# Supplementary material
Source: PubMed Central journal article supplement (PMC7294732)
Supplement: ml0c00153_si_001.pdf [file ml0c00153_si_001.pdf]

# Design and Synthesis of 1,2-Deoxy-pyranose Derivatives of Spliceostatin A toward Prostate Cancer Treatment

Yusuke Yoshikawa<sup>#,a</sup>, Airi Ishibashi<sup>#,b</sup>, Tsunayoshi Takehara<sup>c</sup>, Takeyuki Suzuki<sup>c</sup>, Kenichi Murai<sup>a</sup>, Yasufumi Kaneda<sup>b</sup>, Keisuke Nimura<sup>\*b</sup>, Mitsuhiro Arisawa<sup>\*a</sup>

a) Graduate School of Pharmaceutical Sciences, Osaka University, Yamada-oka 1-6, Suita, Osaka 565-0871, Japan. *el*: (+81) 6-6879-8226, *Fax*: (+81) 6-6879-8226, *E-mail*: arisaw@phs.osaka-u.ac.jp

b) Division of Gene Therapy Science, Graduate School of Medicine, Osaka University, 2-2 Yamada-oka, Suita, Osaka 565-0871, Japan. *el*: (+81) 6-6879-3901; *Fax*: (+81) 6-6879-3909, *E-mail*: nimura@gts.med.osaka-u.ac.jp

c) Comprehensive Analysis Center, The Institute of Scientific and Industrial Research, Osaka University, Mihogaoka 8-1, Ibaraki, Osaka 567-0047, Japan

## Contents

|                                         |       |
|-----------------------------------------|-------|
| 1. General Remarks                      | SI- 1 |
| 2. Structure of SF3b complex Inhibitors | SI- 2 |
| 3. Reaction Conditions                  | SI- 2 |
| 4. Experimental Procedure               | SI- 3 |
| 5. Analytical RP-HPLC                   | SI-21 |
| 6. Biological Assay                     | SI-23 |
| 7. Reference                            | SI-23 |
| 8. NMR Spectra                          | SI-24 |

## 1. General Remarks

All reactions were monitored by thin-layer chromatography using silica plate. The products were purified by column chromatography over silica gel (70–230 mesh ASTM or 40–50  $\mu\text{m}$ , spherical neutral). <sup>1</sup>H NMR and <sup>13</sup>C NMR were recorded at 25 °C on 300 and 75, 400 and 100, 500 and 125 MHz, respectively, and the chemical shifts are reported relative to CDCl<sub>3</sub> (<sup>1</sup>H,  $\delta = 7.26$ , <sup>13</sup>C,  $\delta = 77.0$ ). Data for <sup>1</sup>H NMR spectra are reported as follows: chemical shift ( $\delta$  ppm) (integration, multiplicity, coupling constant (Hz)). Multiplicity and qualifier abbreviations are as follows: s = singlet, d = doublet, t = triplet, q = quartet, m = multiplet, br = broad. High-resolution mass spectra were performed by a mass spectrometer using an orbitrap analyzer. Optical rotations were measured on a polarimeter.

## 2. Structure of SF3b complex Inhibitors

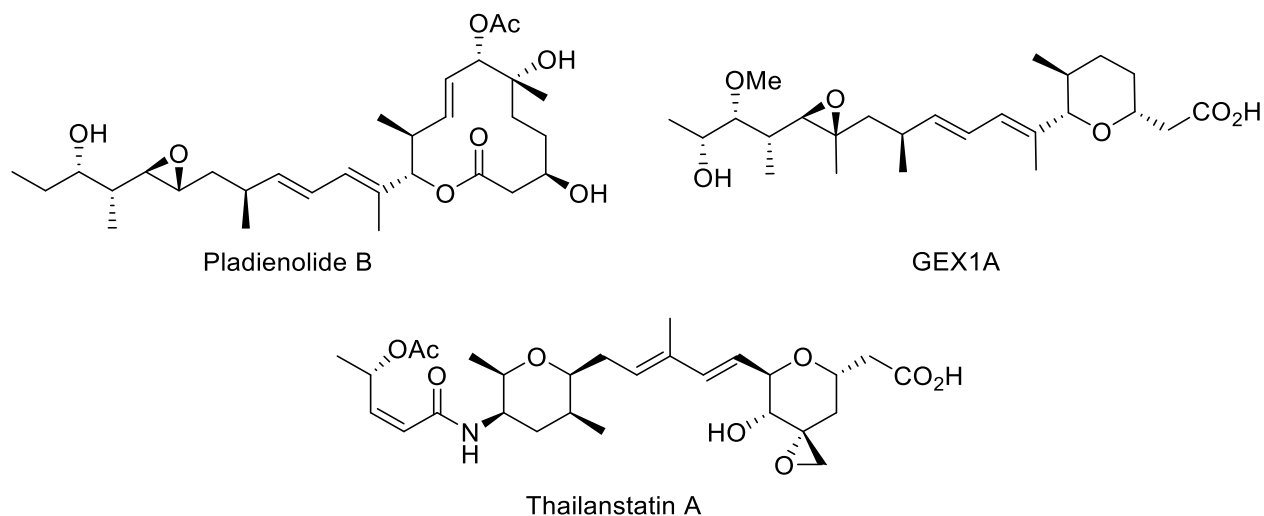

Scheme S1. Structure of Pladienolide B, GEX1A and Thailanstatin A

## 3. Reaction Conditions

### (1) Wittig reaction of **I** and **18**

Conditions for Wittig reactions to build trisubstituted olefins (from **I** to **II** and **III**, and from **18** to **19** and **20**) are shown below. The type of base and the reaction temperature significantly affect the yields and *E* and *Z* selectivity.

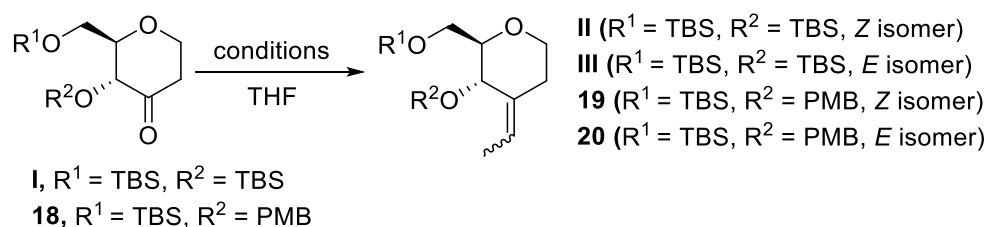

| entry |           | reagent                                                      | Base                        | yield                                                                   |
|-------|-----------|--------------------------------------------------------------|-----------------------------|-------------------------------------------------------------------------|
| 1     | <b>I</b>  | EtPPh <sub>3</sub> <sup>+</sup> Br <sup>-</sup><br>(3.0 eq.) | <i>t</i> BuOK<br>(2.8 eq.)  | 0 °C to rt. : trace                                                     |
| 2     |           |                                                              |                             | 0 °C to 40 °C : trace                                                   |
| 3     | <b>I</b>  | EtPPh <sub>3</sub> <sup>+</sup> Br <sup>-</sup><br>(3.0 eq.) | <i>n</i> -BuLi<br>(2.8 eq.) | 0 °C to rt. : trace                                                     |
| 4     |           |                                                              |                             | 0 °C to 40 °C : 55%<br>( <b>II</b> : <b>III</b> = 5.5 : 1) <sup>a</sup> |
| 5     | <b>18</b> | EtPPh <sub>3</sub> <sup>+</sup> Br <sup>-</sup><br>(3.0 eq.) | <i>t</i> BuOK<br>(2.8 eq.)  | 0 °C to rt.: trace                                                      |
| 6     |           |                                                              |                             | 0 °C to 40 °C : trace                                                   |
| 7     | <b>18</b> | EtPPh <sub>3</sub> <sup>+</sup> Br <sup>-</sup><br>(3.0 eq.) | <i>n</i> -BuLi<br>(2.8 eq.) | 93% ( <b>19</b> : <b>20</b> = 1 : 1)<br>(0 °C to 40 °C)                 |

a, Ratio of geometric isomers were determined by H<sup>1</sup>NMR

Scheme S2. Wittig reaction of **I** and **18**

(2)

As shown below, the Julia coupling reaction with combination **12** and **7** or **8** was not successful. Introduction of a methyl group into the epoxide group could change the steric environment around the sulfonyl group.

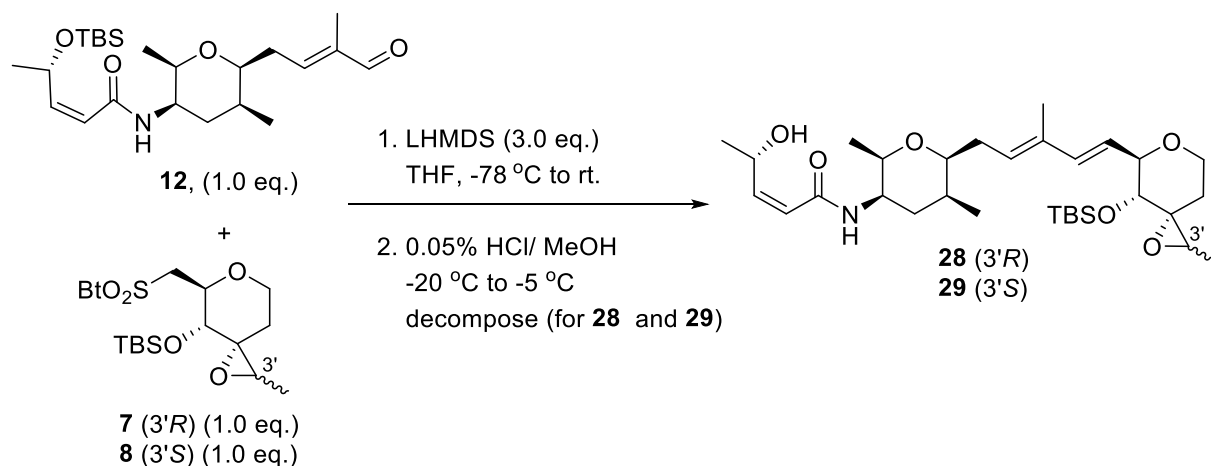

Scheme S3. Julia Kocienski olefination of **12** and **7, 8**

## 4. Experimental Procedure

Preparation and data for **16** from D-glucal : See reference 1.

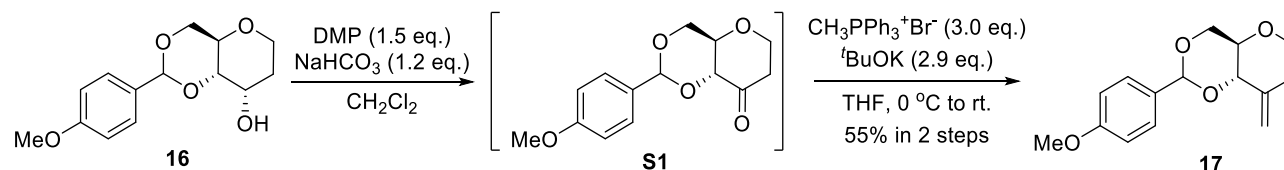

### Compound 17

(Step 1): To a solution of **16** (250 mg, 0.939 mmol, 1.0 equiv.) in dry CH<sub>2</sub>Cl<sub>2</sub> (10 ml) was added DMP (593 mg, 1.40 mmol, 1.5 equiv.) and NaHCO<sub>3</sub> (94.0 mg, 1.12 mmol, 1.2 equiv.) at room temperature. After stirring for 6 h, the reaction mixture was diluted with Et<sub>2</sub>O and quenched with saturated NaHCO<sub>3</sub> aq and saturated Na<sub>2</sub>S<sub>2</sub>O<sub>3</sub> aq. The organic compounds were extracted with Et<sub>2</sub>O. The organic layers were combined, and the solution was dried over anhydrous Na<sub>2</sub>SO<sub>4</sub>, and concentrated under reduced pressure. The residue was passed through a short silica gel column (*n*-hexane/EtOAc = 1/1) to give the crude **S1** (231 mg, 0.874 mmol).

(Step 2): To a solution of MePPh<sub>3</sub><sup>+</sup>Br<sup>-</sup> (934 mg, 2.61 mmol, 3.0 equiv.) in dry THF (13 ml) was added <sup>t</sup>BuOK (285 g, 2.54 mmol, 2.9 equiv.) at 0 °C. After stirring for 10 min, a solution of **S1** (231 mg, 0.874 mmol, 1.0 equiv.) in THF (5.0 ml) was then added via syringe, and then the reaction mixture was warmed to room temperature. After stirring for 20 min, the reaction mixture was quenched with saturated NH<sub>4</sub>Cl aq. The organic compounds were extracted with EtOAc. The organic layers were combined, and the solution was dried over anhydrous Na<sub>2</sub>SO<sub>4</sub>, and concentrated under reduced pressure. The residue was purified by silica gel column chromatography (*n*-hexane/EtOAc = 10/1) to give **17** (135 mg, 0.514 mmol, 55% in 2 steps) as a colorless oil.

**<sup>1</sup>H-NMR** (CDCl<sub>3</sub>, 400 MHz) δ: 7.46 (2H, d, *J* = 8.7 Hz), 6.90 (2H, d, *J* = 8.7 Hz), 5.61 (1H, s), 5.09 (1H, d, *J* = 1.8 Hz), 4.89 (1H, d, *J* = 1.8 Hz), 4.89 (1H, d, *J* = 1.8 Hz), 4.26 (1H, dd, *J* = 10.6, 5.0 Hz), 4.04 (1H, dd, *J* = 10.6, 4.6 Hz), 4.01 (1H, d, *J* = 9.2 Hz), 3.81 (3H, s), 3.74 (1H, dd, *J* = 10.3, 10.3 Hz), 3.53 (1H, ddd, *J* = 12.4, 10.5, 2.8 Hz), 3.31 (1H, ddd, *J* = 9.2, 9.2, 5.0 Hz), 2.53 (1H, ddd, *J* = 14.2, 13.7, 6.0 Hz), 2.36 (1H, ddd, *J* = 14.2, 1.8, 1.8 Hz). **<sup>13</sup>C-NMR**; 35.0, 55.2, 69.1, 69.3, 74.8, 80.2, 101.3, 105.8, 113.5, 127.5, 130.2, 142.0, 160.0; **HRMS** (MALDI-TOF) *m/z* 263.1279 (calcd for C<sub>15</sub>H<sub>19</sub>O<sub>4</sub> [M], 263.1278). [α]<sub>D</sub><sup>23</sup> = +37.9 (c 0.34, CHCl<sub>3</sub>).

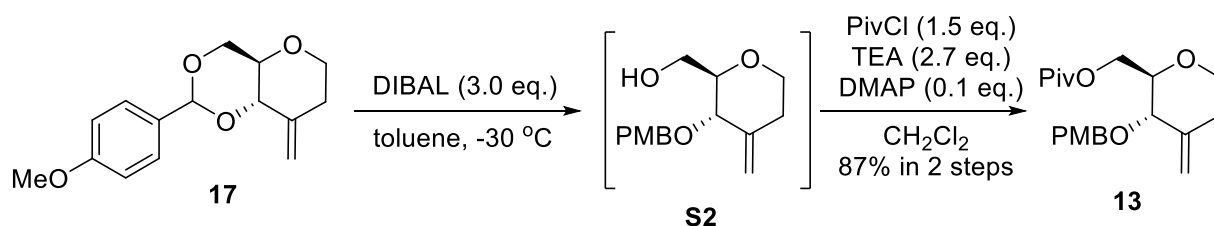

### Compound 13

(Step 1): To a solution of **17** (3.00 g, 11.4 mmol, 1.0 equiv.) in dry toluene (110 ml) was added DIBAL (1M toluene solution) (34 ml, 34.0 mmol, 3.0 equiv.) at -30 °C. After stirring for 6.5 h, the reaction mixture was quenched with MeOH and saturated potassium sodium tartrate aq. The organic compounds were extracted with EtOAc. The organic layers were combined, and the solution was dried over anhydrous Na<sub>2</sub>SO<sub>4</sub>, and concentrated under reduced pressure to give the crude **S2** (2.89 g, 10.9 mmol).

(Step 2): To a solution of **S2** (2.89 g, 10.9 mmol, 1.0 equiv.) in dry CH<sub>2</sub>Cl<sub>2</sub> (50 ml) were added PivCl (2.0 ml, 16.4 mmol, 1.5 equiv.), TEA (4.0 ml, 28.9 mmol, 2.7 equiv.) and DMAP (133 mg, 1.09 mmol, 0.1 equiv.) at room temperature. After stirring for 2 h, the reaction mixture was quenched with H<sub>2</sub>O. The organic compounds were extracted with CH<sub>2</sub>Cl<sub>2</sub>. The organic layers were combined, and the solution was dried over anhydrous Na<sub>2</sub>SO<sub>4</sub>, and concentrated under reduced pressure. The residue was purified by silica gel column chromatography (*n*-hexane/EtOAc = 10/1) to give **13** (3.47 g, 9.96 mmol, 87%) as a colorless oil.

**<sup>1</sup>H-NMR** (CDCl<sub>3</sub>, 400 MHz) δ: 7.28 (2H, d, *J* = 8.7 Hz), 6.88 (2H, d, *J* = 8.7 Hz), 5.11 (1H, d, *J* = 0.9 Hz), 4.94 (1H, d, *J* = 0.9 Hz), 4.63 (1H, d, *J* = 10.8 Hz), 4.39 (1H, d, *J* = 10.8 Hz), 4.35 (1H, dd, *J* = 11.9, 2.7 Hz), 4.25 (1H, dd, *J* = 11.9, 5.0 Hz), 3.99 (1H, m), 3.80 (3H, s), 3.79 (1H, m), 3.43-3.37 (2H, m), 2.40-2.29 (2H, m), 1.21 (9H, s). **<sup>13</sup>C-NMR** (CDCl<sub>3</sub>, 125 MHz) δ: 27.1, 35.1, 38.8, 55.2, 63.4, 68.5, 72.5, 79.9, 107.2, 113.8, 113.9, 129.6, 129.8, 143.9, 159.3, 178.2. **HRMS** (MALDI-TOF) *m/z* 371.1829 (calcd for C<sub>20</sub>H<sub>28</sub>O<sub>5</sub>Na [M+Na]<sup>+</sup>, 371.1826). [α]<sub>D</sub><sup>23</sup> = +130.9 (c 0.09, CHCl<sub>3</sub>).

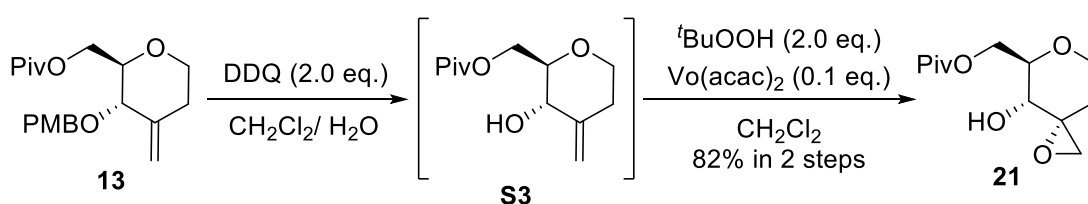

## Compound 21

(Step 1): To a solution of **13** (3.47 g, 9.96 mmol, 1.0 equiv.) in CH<sub>2</sub>Cl<sub>2</sub>/ H<sub>2</sub>O (10 : 1, 100 ml) was added DDQ (4.52 g, 19.9 mmol, 2.0 equiv.) at room temperature. After stirring for 14 h, the reaction mixture was quenched with saturated NaHCO<sub>3</sub> aq and saturated Na<sub>2</sub>S<sub>2</sub>O<sub>3</sub> aq. The organic compounds were extracted with CH<sub>2</sub>Cl<sub>2</sub>. The organic layers were combined, and the solution was dried over anhydrous Na<sub>2</sub>SO<sub>4</sub>, and concentrated under reduced pressure. The residue was passed through a short silica gel column (*n*-hexane/EtOAc = 3/1) to give the crude **S3**.

(Step 2): To a solution of **S3** in dry CH<sub>2</sub>Cl<sub>2</sub> (97 ml) were added <sup>t</sup>BuOOH (5.5 M in decane solution) (3.5 ml, 19.4 mmol, 2.0 equiv.) and VO(acac)<sub>2</sub> (257 mg, 0.969 mmol, 0.1 equiv.) at room temperature. After stirring for 4 h, the reaction mixture was quenched with saturated NaHCO<sub>3</sub> aq and saturated Na<sub>2</sub>S<sub>2</sub>O<sub>3</sub> aq. The organic compounds were extracted with CH<sub>2</sub>Cl<sub>2</sub>. The organic layers were combined, and the solution was dried over anhydrous Na<sub>2</sub>SO<sub>4</sub>, and concentrated under reduced pressure. The residue was purified by silica gel column chromatography (*n*-hexane/EtOAc = 2/1) to give **21** (2.01 g, 8.23 mmol, 82% in 2 steps) as a colorless oil.

<sup>1</sup>H-NMR (CDCl<sub>3</sub>, 400 MHz) δ: 4.41 (1H, dd, *J* = 11.9, 4.1 Hz), 4.31 (1H, dd, *J* = 11.9, 5.0 Hz), 3.98 (1H, dd, *J* = 10.5, 4.6 Hz), 3.74-3.63 (2H, m), 3.43 (1H, ddd, *J* = 7.4, 5.0, 2.3 Hz), 3.15 (1H, d, *J* = 4.4 Hz), 2.65 (1H, d, *J* = 4.4 Hz), 2.32 (1H, m), 1.99 (1H, d, *J* = 10.5 Hz), 1.40 (1H, m), 1.23 (9H, s). <sup>13</sup>C-NMR (CDCl<sub>3</sub>, 125 MHz) δ: 27.1, 32.9, 38.8, 49.5, 58.3, 63.9, 64.8, 65.0, 78.9, 178.6. HRMS (MALDI-TOF) *m/z* 267.1203 (calcd for C<sub>12</sub>H<sub>20</sub>O<sub>5</sub>Na [M+Na]<sup>+</sup>, 267.1204). [α]<sub>D</sub><sup>23</sup> = +30.2 (c 0.19, CHCl<sub>3</sub>).

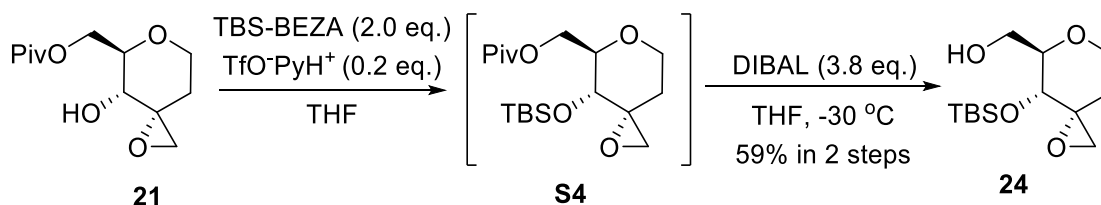

## Compound 24

(Step 1): To a solution of **21** (857 mg, 3.51 mmol, 1.0 equiv.) in dry THF (8.0 ml) was added TBS-BEZA (2.19 g, 7.03 mmol, 2.0 equiv.) and TfO·PyH<sup>+</sup> (174 mg, 0.759 mmol, 0.2 equiv.) at room temperature. After stirring for 15 h, the reaction mixture was quenched with saturated NaHCO<sub>3</sub> aq. The organic compounds were extracted with EtOAc. The organic layers were combined, and the solution was dried over anhydrous Na<sub>2</sub>SO<sub>4</sub>, and concentrated under reduced pressure. The residue was passed through a short silica gel column (*n*-hexane/EtOAc = 10/1 to 5/1) to give the crude **S4** (1.01 g, 2.82 mmol).

(Step 2): To a solution of **S4** (1.01 g, 2.82 mmol, 1.0 equiv.) in dry THF (15 ml) was added DIBAL (1M toluene solution) (10.7 ml, 10.7 mmol, 3.8 equiv.) at -30 °C. After stirring for 4 h, the reaction mixture was quenched with MeOH and saturated potassium sodium tartrate aq. The organic compounds were extracted with EtOAc. The organic layers were combined, and the solution was dried over anhydrous Na<sub>2</sub>SO<sub>4</sub>, and concentrated under reduced pressure.

The residue was purified by silica gel column chromatography (*n*-hexane/EtOAc = 3/1 to 2/1) to give **24** (567 mg, 2.07 mmol, 59% in 2 steps) as a colorless oil.

**<sup>1</sup>H-NMR** (CDCl<sub>3</sub>, 300 MHz) δ: 3.96 (1H, ddd, *J* = 11.4, 5.5, 1.4 Hz), 3.84 (1H, d, *J* = 9.2 Hz), 3.84-3.74 (2H, m), 3.64 (1H, ddd, *J* = 7.4, 6.9, 5.0 Hz), 3.54 (1H, ddd, *J* = 7.4, 5.0, 2.8 Hz), 3.06 (1H, d, *J* = 5.0 Hz), 2.59 (1H, d, *J* = 5.0 Hz), 2.22 (1H, ddd, *J* = 13.7, 12.4, 5.5 Hz), 1.94 (1H, t, *J* = 6.4 Hz), 1.34 (1H, ddd, *J* = 13.7, 2.3, 1.4 Hz), 0.89 (9H, s), 0.11 (3H, s), 0.06 (3H, s). **<sup>13</sup>C-NMR** (CDCl<sub>3</sub>, 125 MHz) δ: -4.76, -4.57, 18.0, 25.7, 33.9, 50.1, 59.3, 62.0, 65.1, 66.2, 79.9. **HRMS** (MALDI-TOF) *m/z* 297.1493 (calcd for C<sub>13</sub>H<sub>26</sub>O<sub>4</sub>SiNa [M+Na]<sup>+</sup>, 297.1493). [α]<sub>D</sub><sup>23</sup> = +68.2 (c 0.15, CHCl<sub>3</sub>).

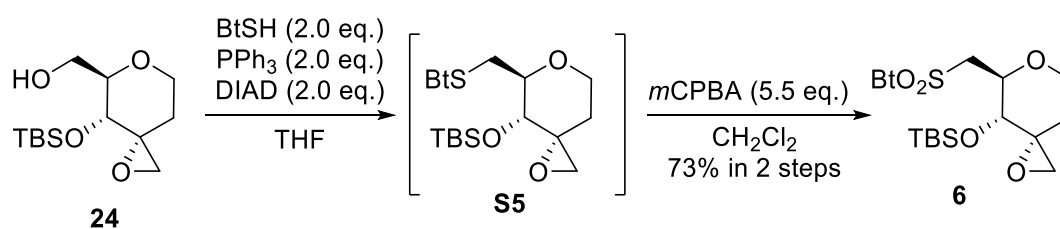

### Compound 6

(Step 1): To a solution of **27** (214 mg, 0.780 mmol, 1.0 equiv.) in dry THF (5.2 ml) was added BtSH (260 mg, 1.55 mmol, 2.0 equiv.), PPh<sub>3</sub> (409 mg, 1.56 mmol, 2.0 equiv.) and DIAD (0.3 ml, 1.56 mmol, 2.0 equiv.) at 0°C, and then the reaction mixture was warmed to room temperature. After stirring for 2 h, the reaction mixture was quenched with H<sub>2</sub>O. The organic compounds were extracted with EtOAc. The organic layers were combined, and the solution was dried over anhydrous Na<sub>2</sub>SO<sub>4</sub>, and concentrated under reduced pressure. The residue was passed through a short silica gel column (*n*-hexane/EtOAc = 20/1 to 10/1) to give the crude **S5**.

(Step 2): To a solution of above **S5** in dry CH<sub>2</sub>Cl<sub>2</sub> (3.2 ml) was added *m*-CPBA (740 mg, 4.29 mmol, 5.5 equiv.) at room temperature. After stirring for 18 h, the reaction mixture was quenched with saturated NaHCO<sub>3</sub> aq and saturated Na<sub>2</sub>S<sub>2</sub>O<sub>3</sub> aq. The organic compounds were extracted with CH<sub>2</sub>Cl<sub>2</sub>. The organic layers were combined, and the solution was dried over anhydrous Na<sub>2</sub>SO<sub>4</sub>, and concentrated under reduced pressure. The residue was purified by silica gel column chromatography (*n*-hexane/EtOAc = 3/1) to give **6** (250 mg, 0.569 mmol, 73% in 2 steps) as a white solid (mp 150-152 °C).

**<sup>1</sup>H-NMR** (CDCl<sub>3</sub>, 400 MHz) δ: 8.20 (1H, dd, *J* = 7.8, 0.9 Hz), 8.00 (1H, dd, *J* = 7.8, 1.8 Hz), 7.64-7.55 (2H, m), 4.17 (1H, ddd, *J* = 10.1, 8.7, 2.3 Hz), 3.83 (1H, ddd, *J* = 14.6, 2.3 Hz), 3.73 (1H, ddd, *J* = 14.6, 10.1 Hz), 3.67 (1H, d, *J* = 8.7 Hz), 3.66 (1H, m), 3.56 (1H, ddd, *J* = 11.4, 6.0, 2.1 Hz), 3.00 (1H, d, *J* = 4.8 Hz), 2.57 (1H, d, *J* = 4.8 Hz), 2.06 (1H, ddd, *J* = 14.0, 11.9, 6.0 Hz), 1.31 (1H, ddd, *J* = 14.0, 2.3, 2.1 Hz), 0.90 (9H, s), 0.12 (3H, s), 0.06 (3H, s). **<sup>13</sup>C-NMR** (CDCl<sub>3</sub>, 100 MHz) δ: -4.5, -4.2, 17.9, 25.6, 33.2, 50.2, 56.9, 58.6, 64.9, 69.0, 75.2, 122.2, 125.3, 127.3, 127.8, 136.8, 152.5, 170.0. **HRMS** (MALDI-TOF) *m/z* 478.1147 (calcd for C<sub>20</sub>H<sub>29</sub>NO<sub>5</sub>SiNaS<sub>2</sub> [M+Na]<sup>+</sup>, 478.1149). [α]<sub>D</sub><sup>23</sup> = +24.9 (c 0.19, CHCl<sub>3</sub>).

Preparation and data for **12** : See reference 2.

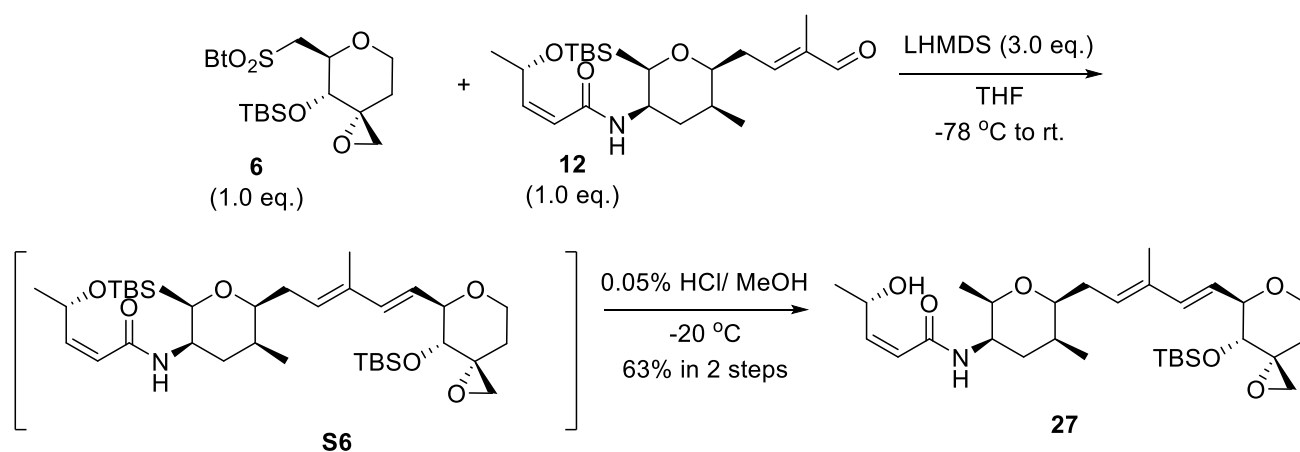

### Compound **27**

(Step 1): To a solution of **6** (99.0 mg, 0.234 mmol, 1.0 equiv.) and **12** (107 mg, 0.243 mmol, 1.0 equiv.) in dry THF (1.5 ml) was added LHMDS (1M THF solution) (0.7 ml, 0.700 mmol, 3.0 equiv.) at -78 °C for 10 min. Then, the reaction mixture was warm to room temperature. After stirring for 18 h, the reaction mixture was quenched with saturated NH<sub>4</sub>Cl aq. The organic compounds were extracted with EtOAc. The organic layers were combined, and the solution was dried over anhydrous Na<sub>2</sub>SO<sub>4</sub>, and concentrated under reduced pressure. The residue was passed through a short silica gel column (*n*-hexane/ EtOAc = 5/1) to give the crude **S6** (136 mg, 0.205 mmol).

(Step 2): To **S6** (136 mg, 0.205 mmol) was added 0.05% HCl/ MeOH (1.5 ml) at -20 °C. After stirring for 13 h, the reaction mixture was quenched with saturated NaHCO<sub>3</sub> aq. The organic compounds were extracted with EtOAc. The organic layers were combined, and the solution was dried over anhydrous Na<sub>2</sub>SO<sub>4</sub>, and concentrated under reduced pressure. The residue was purified by silica gel column chromatography (*n*-hexane/EtOAc = 1/1) to give **27** (81.6 mg, 0.148 mmol, 63% in 2 steps) as a colorless amorphous solid.

**<sup>1</sup>H-NMR** (CDCl<sub>3</sub>, 400 MHz) δ: 6.20 (1H, d, *J* = 15.6 Hz), 6.18 (1H, dd, *J* = 11.9, 5.5 Hz), 5.90 (1H, d, *J* = 8.7 Hz), 5.71 (1H, d, *J* = 11.9 Hz), 5.57 (1H, d, *J* = 4.6 Hz), 5.53 (1H, dd, *J* = 15.6, 7.3 Hz), 5.45 (1H, t, *J* = 6.6 Hz), 4.77 (1H, m), 4.01-3.93 (3H, m), 3.79 (1H, m), 3.65 (2H, d, *J* = 8.7 Hz), 3.53 (1H, m), 3.06 (1H, d, *J* = 5.0 Hz), 2.60 (1H, d, *J* = 5.0 Hz), 2.37 (1H, m), 2.28-2.20 (2H, m), 1.94 (1H, m), 1.79-1.73 (2H, m), 1.75 (3H, s), 1.37 (1H, m), 1.35 (3H, d, *J* = 6.9 Hz), 1.13 (3H, d, *J* = 6.4 Hz), 1.00 (3H, d, *J* = 6.8 Hz), 0.84 (9H, s), 0.02 (3H, s), -0.03 (3H, s), **<sup>13</sup>C-NMR** (CDCl<sub>3</sub>, 125 MHz) δ: -4.4, -4.2, 12.5, 15.1, 17.8, 18.0, 22.7, 25.7, 28.8, 31.8, 34.0, 35.7, 47.5, 50.3, 59.4, 64.5, 65.0, 70.4, 75.8, 80.9, 81.5, 122.5, 124.5, 128.6, 134.5, 138.2, 150.7, 166.1. **HRMS** (MALDI-TOF) *m/z* 572.3382 (calcd for C<sub>30</sub>H<sub>51</sub>NO<sub>6</sub>SiNa [M+Na]<sup>+</sup>, 572.3378). [α]<sub>D</sub><sup>23</sup> = +14.3 (c 0.03, CHCl<sub>3</sub>).

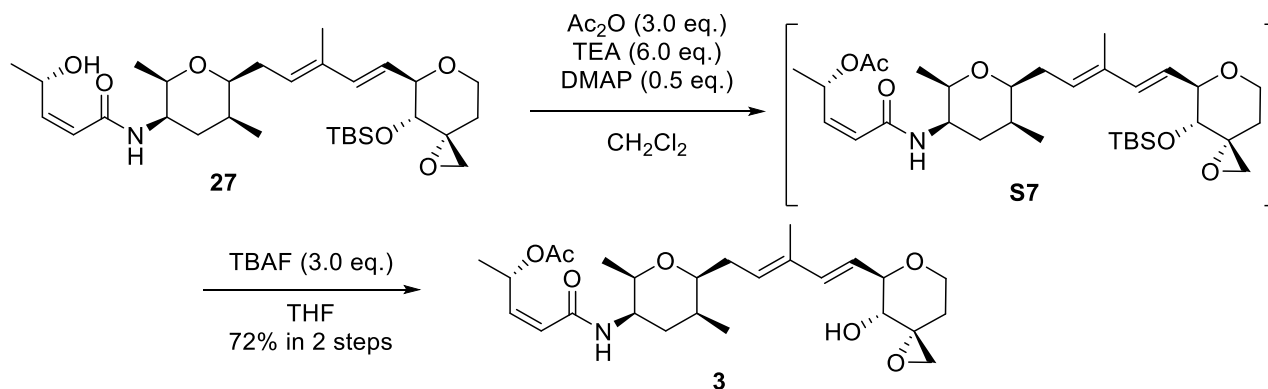

### Compound 3

(Step 1): To a solution of **27** (158 mg, 0.288 mmol, 1.0 equiv.) in dry  $\text{CH}_2\text{Cl}_2$  (3.0 ml) was added TEA (200  $\mu\text{l}$ , 1.64 mmol, 6.0 equiv.), DMAP (18.0 mg, 0.144 mmol, 0.5 equiv.) then  $\text{Ac}_2\text{O}$  (90  $\mu\text{l}$ , 0.862 mmol, 3.0 equiv.) at room temperature. After stirring for 3.5 h, the reaction mixture was quenched with  $\text{H}_2\text{O}$ . The organic compounds were extracted with  $\text{CH}_2\text{Cl}_2$ . The organic layers were combined, and the solution was dried over anhydrous  $\text{Na}_2\text{SO}_4$ , and concentrated under reduced pressure. The residue was passed through a short silica gel column (*n*-hexane/EtOAc = 5/1) to give the crude **S7** (165 mg, 0.278 mmol).

(Step 2): To a solution of **S7** (165 mg, 0.278 mmol) in dry THF (1.0 ml) was added TBAF (1M THF solution) (0.85 ml, 0.85 mmol, 3.0 equiv.) at room temperature. After stirring for 1.5 h, the reaction mixture was quenched with saturated  $\text{NH}_4\text{Cl}$  aq. The organic compounds were extracted with EtOAc. The organic layers were combined, and the solution was dried over anhydrous  $\text{Na}_2\text{SO}_4$ , and concentrated under reduced pressure. The residue was purified by silica gel column chromatography (*n*-hexane/EtOAc = 1/2) to give **3** (99.0 mg, 0.207 mmol, 72% in 2 steps) as a white solid (mp 72-75  $^\circ\text{C}$ ).

$^1\text{H-NMR}$  ( $\text{CDCl}_3$ , 500 MHz)  $\delta$ : 6.39 (1H, d,  $J = 15.8$  Hz), 6.25 (1H, m), 6.00 (1H, d,  $J = 8.9$  Hz), 5.89 (1H, dd,  $J = 11.7, 8.1$  Hz), 5.70 (1H, dd,  $J = 11.7, 1.2$  Hz), 5.64 (1H, dd,  $J = 15.8, 6.0$  Hz), 5.50 (1H, t,  $J = 7.0$  Hz), 4.01 (1H, dd,  $J = 11.5, 6.0$  Hz), 3.93 (1H, m), 3.79-3.71 (2H, m), 3.65 (1H, dq,  $J = 6.3, 2.0$  Hz), 3.63 (1H, m), 3.51 (1H, dt,  $J = 7.2, 2.9$  Hz), 3.15 (1H, d,  $J = 4.6$  Hz), 2.65 (1H, d,  $J = 4.6$  Hz), 2.41-2.31 (2H, m), 2.23 (1H, m), 2.03 (3H, s), 1.98-1.89 (2H, m), 1.80-1.74 (2H, m), 1.77 (3H, s), 1.42 (1H, m), 1.38 (3H, d,  $J = 6.6$  Hz), 1.14 (3H, d,  $J = 6.3$  Hz), 1.01 (3H, d,  $J = 7.2$  Hz).  $^{13}\text{C-NMR}$  ( $\text{CDCl}_3$ , 125 MHz)  $\delta$ : 12.6, 15.1, 17.8, 20.0, 21.2, 28.9, 31.9, 33.2, 35.8, 47.1, 49.7, 58.5, 64.9, 68.7, 68.9, 75.9, 80.8, 81.3, 122.5, 124.1, 129.1, 134.6, 138.0, 143.6, 164.8, 170.4. HRMS (MALDI-TOF)  $m/z$  500.2618 (calcd for  $\text{C}_{26}\text{H}_{39}\text{NO}_7\text{Na}$   $[\text{M}+\text{Na}]^+$ , 500.2619).  $[\alpha]^{23}_{\text{D}} = -11.0$  (c 0.03,  $\text{CHCl}_3$ ).

Preparation and data for **A** from D-glucal : See reference 3.

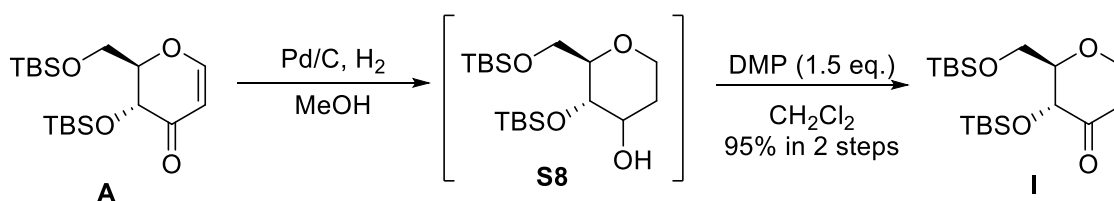



## Compound I

(Step 1): To a solution of **A** (1.13 g, 2.99 mmol, 1.0 equiv.) in dry MeOH (30 ml) was added 10% Pd/C (110 mg, 10% w/w) at room temperature. After stirring for 9 h, the reaction mixture was filtered with celite and washed with AcOEt to give the crude **S8**.

(Step 2): To a solution of **S8** in dry CH<sub>2</sub>Cl<sub>2</sub> (30 ml) was added DMP (1.90 g, 4.48 mmol, 1.2 equiv.) at room temperature. After stirring for 1 h, the reaction mixture was diluted with Et<sub>2</sub>O and quenched with saturated NaHCO<sub>3</sub> aq and saturated Na<sub>2</sub>S<sub>2</sub>O<sub>3</sub> aq. The organic compounds were extracted with Et<sub>2</sub>O. The organic layers were combined, and the solution was dried over anhydrous Na<sub>2</sub>SO<sub>4</sub>, and concentrated under reduced pressure. The residue was passed through a silica gel column (*n*-hexane/EtOAc = 10/1) to give **xx** (1.18 g, 3.15 mmol, 95% in 2 steps) as a colorless oil.

<sup>1</sup>H-NMR (CDCl<sub>3</sub>, 300 MHz) δ: 4.26-4.20 (2H, m), 3.93 (1H, dd, *J* = 11.3, 1.7 Hz), 3.85 (1H, dd, *J* = 11.3, 4.1 Hz), 3.61 (1H, m), 3.40 (1H, ddd, *J* = 9.3, 3.8, 1.7 Hz), 2.65 (1H, m), 2.41 (1H, m), 0.91 (9H, s), 0.90 (9H, s), 0.17 (3H, s), 0.09 (3H, s), 0.08 (3H, s), 0.03 (3H, s). <sup>13</sup>C-NMR (CDCl<sub>3</sub>, 125 MHz) δ: -5.7, -5.3, -5.0, -4.3, 18.4, 18.5, 25.8, 25.9, 42.1, 62.9, 66.8, 75.1, 84.3, 206.5. HRMS (APCA) *m/z* 375.2381 (calcd for C<sub>18</sub>H<sub>39</sub>O<sub>4</sub>Si<sub>2</sub> [M+H], 375.2387). [α]<sub>D</sub><sup>23</sup> = +62.2 (c 0.75, CHCl<sub>3</sub>).

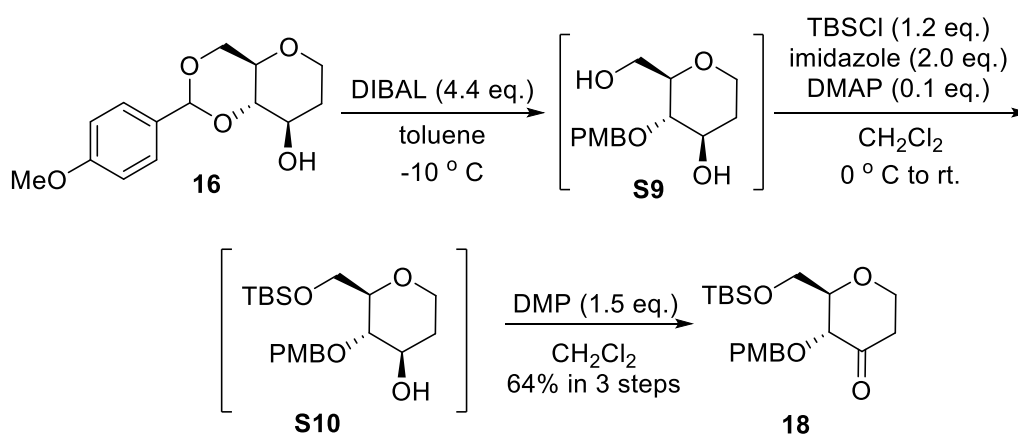

## Compound 18

(Step 1): To a solution of **16** (600 mg, 2.25 mmol, 1.0 equiv.) in dry toluene (22 ml) was added DIBAL (1M toluene solution) (10.0 ml, 10.0 mmol, 4.4 equiv.) at -10 °C. After stirring for 6 h, the reaction mixture was quenched with MeOH and saturated potassium sodium tartrate aq. The organic compounds were extracted with EtOAc. The organic layers were combined, and the solution was dried over anhydrous Na<sub>2</sub>SO<sub>4</sub>, and concentrated under reduced pressure to give the crude **S9**.

(Step 2): To a solution of crude **S9** in dry CH<sub>2</sub>Cl<sub>2</sub> (12 ml) were added imidazole (306 mg, 4.5 mmol, 2.0 equiv.), DMAP (29.2 mg, 0.239 mmol, 0.1 equiv.) at 0 °C. After stirring for 10 min, TBSCl (405 mg, 2.69 mmol, 1.2 equiv.) was then added, and then the reaction mixture was warmed to room temperature. After stirring for 1 h, the reaction

mixture was quenched with saturated NH<sub>4</sub>Cl aq. The organic compounds were extracted with CH<sub>2</sub>Cl<sub>2</sub>. The organic layers were combined, and the solution was dried over anhydrous Na<sub>2</sub>SO<sub>4</sub>, and concentrated under reduced pressure. The residue was purified by short silica gel column chromatography (*n*-hexane/EtOAc = 2/1) to give crude **S10** (560 mg, 1.46 mmol) as a colorless oil.

(Step 3): To a solution of crude **S10** (560 mg, 1.46 mmol, 1.0 equiv.) in dry CH<sub>2</sub>Cl<sub>2</sub> (10 ml) was added DMP (929 mg, 2.19 mmol, 1.5 equiv.) at room temperature. After stirring for 2 h, the reaction mixture was diluted with Et<sub>2</sub>O and quenched with saturated NaHCO<sub>3</sub> aq and saturated Na<sub>2</sub>S<sub>2</sub>O<sub>3</sub> aq. The organic compounds were extracted with Et<sub>2</sub>O. The organic layers were combined, and the solution was dried over anhydrous Na<sub>2</sub>SO<sub>4</sub>, and concentrated under reduced pressure. The residue was passed through a silica gel column (*n*-hexane/EtOAc = 5/1) to give **18** (550 mg, 1.45 mmol, 64% in 3 steps) as a colorless oil.

**<sup>1</sup>H-NMR** (CDCl<sub>3</sub>, 300 MHz) δ: 7.31 (2H, d, *J* = 8.6 Hz), 6.87 (2H, d, *J* = 8.6 Hz), 4.82 (1H, d, *J* = 10.7 Hz), 4.43 (1H, d, *J* = 10.7 Hz), 4.25 (1H, ddd, *J* = 11.2, 9.3, 1.1 Hz), 4.10 (1H, d, *J* = 9.3 Hz), 3.90-3.82 (2H, m), 3.80 (3H, s), 3.62 (1H, ddd, *J* = 12.4, 11.2, 2.4 Hz), 3.49 (1H, ddd, *J* = 8.7, 3.5, 2.1 Hz), 2.69 (1H, m), 2.44 (1H, m), 0.91 (9H, s), 0.09 (6H, s). **<sup>13</sup>C-NMR** (CDCl<sub>3</sub>, 125 MHz) δ: -5.4, -5.2, 18.4, 25.9, 42.5, 55.2, 62.7, 66.9, 73.1, 79.5, 82.8, 113.7, 129.7, 129.8, 159.3, 206.6. **HRMS** (MALDI-TOF) *m/z* 403.1910 (calcd for C<sub>20</sub>H<sub>32</sub>O<sub>5</sub>NaSi [M+Na]<sup>+</sup>, 403.1911). [α]<sub>D</sub><sup>23</sup> = +94.6 (c 0.29, CHCl<sub>3</sub>).

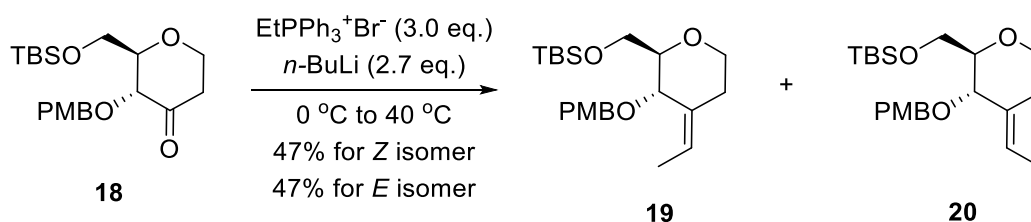

### Compound **19** and **20**

To a solution of EtPPh<sub>3</sub><sup>+</sup>Br<sup>-</sup> (1138 mg, 3.07 mmol, 3.0 equiv.) in dry THF (10 ml) was added *n*-BuLi (2.76 M hexane solution) (1.0 ml, 2.76 mmol, 2.7 equiv.) at 0 °C. After stirring for 10 min, a solution of **18** (390 mg, 1.02 mmol, 1.0 equiv.) in THF (5.0 ml) was then added via syringe, and then the reaction mixture was warmed to 40 °C. After stirring for 2 h, the reaction mixture was quenched with saturated NH<sub>4</sub>Cl aq. The organic compounds were extracted with EtOAc. The organic layers were combined, and the solution was dried over anhydrous Na<sub>2</sub>SO<sub>4</sub>, and concentrated under reduced pressure. The residue was purified by silica gel column chromatography (*n*-hexane/EtOAc = 1/0 to 10/1 to 5/1) to give **19** (*Z* isomer) (190 mg, 0.48 mmol, 47%) and **20** (*E* isomer) (190 mg, 0.48 mmol, 47%) as a colorless oil respectively.

**19** (*Z* isomer): **<sup>1</sup>H-NMR** (CDCl<sub>3</sub>, 400 MHz) δ: 7.27 (2H, d, *J* = 8.7 Hz), 6.85 (2H, d, *J* = 8.7 Hz), 5.64 (1H, dq, *J* = 6.9, 1.8 Hz), 4.56 (1H, d, *J* = 11.9 Hz), 4.34 (1H, m), 4.30 (1H, d, *J* = 11.9 Hz), 3.96 (1H, ddd, *J* = 7.8, 5.5, 1.8 Hz), 3.83-3.77 (1H, m), 3.80 (3H, s), 3.66-3.62 (2H, m), 3.59 (1H, m), 2.73 (1H, m), 1.91 (1H, m), 1.58 (3H, dd, *J* = 6.9, 1.8 Hz), 0.89 (9H, s), 0.02 (3H, s), 0.01 (3H, s). **<sup>13</sup>C-NMR** (CDCl<sub>3</sub>, 100 MHz) δ: -5.6, -5.5, 12.8, 18.0, 25.7, 32.3,

55.2, 60.7, 64.2, 69.0, 70.5, 78.3, 113.7, 124.4, 129.1, 130.8, 131.4, 159.0. **HRMS** (MALDI-TOF)  $m/z$  415.2274 (calcd for  $C_{22}H_{36}O_4NaSi$   $[M+Na]^+$ , 415.2275).  $[\alpha]^{23}_D = -8.19$  (c 0.20,  $CHCl_3$ ).

**20** (*E* isomer):  **$^1H$ -NMR** ( $CDCl_3$ , 400 MHz)  $\delta$ : 7.27 (2H, d,  $J = 8.5$  Hz), 6.87 (2H, d,  $J = 8.5$  Hz), 5.59 (1H, q,  $J = 6.7$  Hz), 4.56 (1H, d,  $J = 11.0$  Hz), 4.39 (1H, d,  $J = 11.0$  Hz), 3.88 (1H, m), 3.80 (3H, s), 3.76 (1H, d,  $J = 4.1$  Hz), 3.79-3.74 (2H, m), 3.45 (1H, dt,  $J = 10.3, 3.2$  Hz), 3.35 (1H, dt,  $J = 7.3, 4.1$  Hz), 2.53 (1H, dt,  $J = 14.2, 3.4$  Hz), 2.12 (1H, ddd,  $J = 14.2, 10.3, 5.0$  Hz), 1.66 (3H, d,  $J = 6.7$  Hz), 0.89 (9H, s), 0.06 (6H, s).  **$^{13}C$ -NMR** ( $CDCl_3$ , 100 MHz)  $\delta$ : -5.3, -5.2, 12.5, 18.3, 25.9, 27.7, 55.2, 62.8, 65.5, 71.6, 77.5, 81.9, 113.7, 117.0, 129.4, 130.6, 133.9, 159.1. **HRMS** (MALDI-TOF)  $m/z$  415.2275 (calcd for  $C_{22}H_{36}O_4NaSi$   $[M+Na]^+$ , 415.2275).  $[\alpha]^{23}_D = +67.4$  (c 0.17,  $CHCl_3$ ).

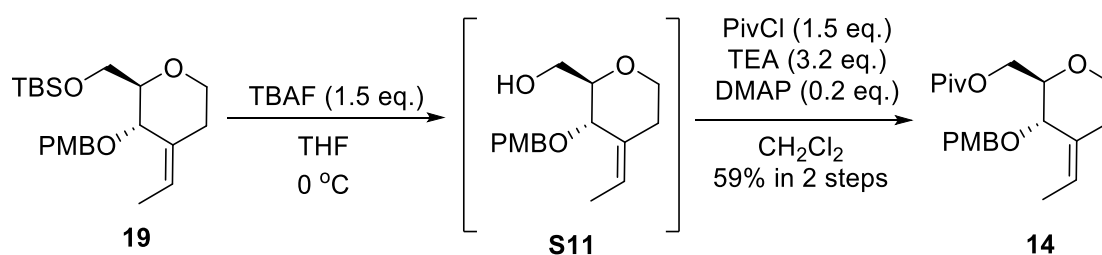

#### Compound 14

(Step 1): To a solution of **19** (1.85 g, 4.71 mmol, 1.0 equiv.) in dry THF (23 ml) was added TBAF (1M THF solution) (7.0 ml, 7.00 mmol, 1.5 equiv.) at 0 °C. After stirring for 2 h, the reaction mixture was quenched with saturated  $NH_4Cl$  aq. The organic compounds were extracted with EtOAc. The organic layers were combined, and the solution was dried over anhydrous  $Na_2SO_4$ , and concentrated under reduced pressure. The residue was passed through a short silica gel column (*n*-hexane/EtOAc = 1/1 to 1/2) to give the crude **S11** (1.17 g, 4.20 mmol).

(Step 2): To a solution of **S11** (1.17 g, 4.20 mmol, 1.0 equiv.) in dry  $CH_2Cl_2$  (35 ml) were added TEA (1.33 g, 13.1 mmol, 3.2 equiv.) and DMAP (54.0 mg, 0.44 mmol, 0.1 equiv.) and then PivCl (790 mg, 6.55 mmol, 1.5 equiv.) at room temperature. After stirring for 1 h, the reaction mixture was quenched with saturated  $NH_4Cl$  aq. The organic compounds were extracted with  $CH_2Cl_2$ . The organic layers were combined, and the solution was dried over anhydrous  $Na_2SO_4$ , and concentrated under reduced pressure. The residue was purified by silica gel column chromatography (*n*-hexane/EtOAc = 10/1) to give **14** (1.01 g, 2.79 mmol, 59% in 2 steps) as a colorless oil.

**$^1H$ -NMR** ( $CDCl_3$ , 300 MHz)  $\delta$ : 7.26 (2H, d,  $J = 8.7$  Hz), 6.86 (2H, d,  $J = 8.7$  Hz), 5.67 (1H, q,  $J = 6.4$  Hz), 4.58 (1H, d,  $J = 11.9$  Hz), 4.26 (1H, d,  $J = 11.9$  Hz), 4.21-4.01 (4H, m), 3.83 (1H, m), 3.80 (3H, s), 3.66 (1H, dt,  $J = 11.0, 3.2$  Hz), 2.75 (1H, m), 1.94 (1H, m), 1.55 (3H, d,  $J = 6.4$  Hz), 1.13 (9H, s),  **$^{13}C$ -NMR** ( $CDCl_3$ , 125 MHz)  $\delta$ : 12.5, 26.9, 32.2, 38.5, 55.1, 61.1, 63.9, 68.9, 70.4, 75.5, 113.6, 124.5, 129.1, 130.3, 130.9, 160.0, 177.9. **HRMS** (MALDI-TOF)  $m/z$  385.1980 (calcd for  $C_{21}H_{30}O_5Na$   $[M+Na]^+$ , 385.1986).  $[\alpha]^{23}_D = +21.9$  (c 0.28,  $CHCl_3$ ).

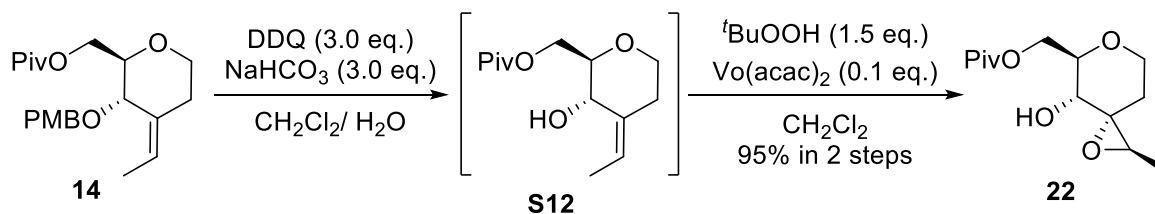

### Compound 22

(Step 1): To a solution of **14** (1.47 g, 4.06 mmol, 1.0 equiv.) in CH<sub>2</sub>Cl<sub>2</sub>/ H<sub>2</sub>O (10 : 1, 40 ml) was added DDQ (2.76 mg, 12.2 mmol, 3.0 equiv.) and NaHCO<sub>3</sub> (1.02 g, 12.1 mmol, 3.0 equiv.) at room temperature. After stirring for 2 h, the reaction mixture was quenched with saturated NaHCO<sub>3</sub> aq and saturated Na<sub>2</sub>S<sub>2</sub>O<sub>3</sub> aq. The organic compounds were extracted with CH<sub>2</sub>Cl<sub>2</sub>. The organic layers were combined, and the solution was dried over anhydrous Na<sub>2</sub>SO<sub>4</sub>, and concentrated under reduced pressure. The residue was passed through a short silica gel column (*n*-hexane/EtOAc = 5/1 to 3/1) to give the crude **S12**.

(Step 2): To a solution of **S12** in dry CH<sub>2</sub>Cl<sub>2</sub> (40 ml) were added <sup>t</sup>BuOOH (5.5 M in decane solution) (1.1 ml, 6.05 mmol, 1.5 equiv.) and Vo(acac)<sub>2</sub> (103 mg, 0.39 mmol, 0.1 equiv.) at room temperature. After stirring for 4 h, the reaction mixture was quenched with saturated NaHCO<sub>3</sub> aq and saturated Na<sub>2</sub>S<sub>2</sub>O<sub>3</sub> aq. The organic compounds were extracted with CH<sub>2</sub>Cl<sub>2</sub>. The organic layers were combined, and the solution was dried over anhydrous Na<sub>2</sub>SO<sub>4</sub>, and concentrated under reduced pressure. The residue was purified by silica gel column chromatography (*n*-hexane/EtOAc = 2/1) to give **22** (996 mg, 3.86 mmol, 95% in 2 steps) as a colorless oil.

<sup>1</sup>H-NMR (CDCl<sub>3</sub>, 300 MHz) δ: 4.41 (1H, dd, *J* = 11.9, 5.3 Hz), 4.31 (1H, dd, *J* = 11.9, 2.1 Hz), 3.92 (1H, ddd, *J* = 10.2, 5.3, 2.1 Hz), 3.76 (1H, t, *J* = 10.2 Hz), 3.64 (1H, dt, *J* = 12.2, 2.3 Hz), 3.44 (1H, m), 2.92 (1H, q, *J* = 6.0 Hz), 2.18 (1H, ddd, *J* = 14.2, 12.2, 5.5 Hz), 2.05 (1H, d, *J* = 10.2 Hz), 1.55 (3H, d, *J* = 6.0 Hz), 1.34 (1H, m), 1.22 (9H, s), <sup>13</sup>C-NMR (CDCl<sub>3</sub>, 125 MHz) δ: 13.4, 27.0, 33.9, 38.6, 60.7, 61.3, 63.5, 64.3, 64.7, 79.1, 178.3. HRMS (MALDI-TOF) *m/z* 281.1359 (calcd for C<sub>13</sub>H<sub>22</sub>O<sub>5</sub>Na [M+Na]<sup>+</sup>, 281.1359). [α]<sub>D</sub><sup>23</sup> = +21.1 (c 0.32, CHCl<sub>3</sub>).

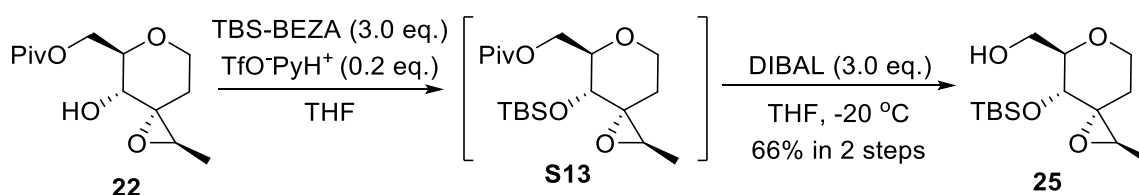

### Compound 25

(Step 1): To a solution of **22** (422 mg, 1.63 mmol, 1.0 equiv.) in dry THF (8.0 ml) was added TBS-BEZA (1.52 g, 4.88 mmol, 3.0 equiv.) and TfO·PyH<sup>+</sup> (75.6 mg, 0.33 mmol, 0.2 equiv.) at room temperature. After stirring for 6 h, the reaction mixture was quenched with saturated NaHCO<sub>3</sub> aq. The organic compounds were extracted with EtOAc. The organic layers were combined, and the solution was dried over anhydrous Na<sub>2</sub>SO<sub>4</sub>, and concentrated under reduced pressure. The residue was passed through a short silica gel column (*n*-hexane/EtOAc = 10/1) to give the crude **S13** (424 mg, 1.14 mmol).

(Step 2): To a solution of **S13** (424 mg, 1.14 mmol, 1.0 equiv.) in dry THF (11 ml) was added DIBAL (1M toluene solution) (3.4 ml, 3.40 mmol, 3.0 equiv.) at -20 °C. After stirring for 3 h, the reaction mixture was quenched with saturated potassium sodium tartrate aq. The organic compounds were extracted with EtOAc. The organic layers were combined, and the solution was dried over anhydrous Na<sub>2</sub>SO<sub>4</sub>, and concentrated under reduced pressure. The residue was purified by silica gel column chromatography (*n*-hexane/EtOAc = 2/1) to give **25** (310 mg, 1.07 mmol, 66% in 2 steps) as a colorless oil.

**<sup>1</sup>H-NMR** (CDCl<sub>3</sub>, 300 MHz) δ: 3.97-3.87 (2H, m), 3.87-3.76 (2H, m), 3.55-3.45 (2H, m), 2.96 (1H, q, *J* = 5.5 Hz), 2.64 (1H, ddd, *J* = 11.9, 11.9, 5.9 Hz), 1.85 (1H, dd, *J* = 8.7, 2.3 Hz), 1.32 (3H, d, *J* = 5.5 Hz), 1.01 (1H, m), 0.92 (9H, s), 0.12 (3H, s), 0.09 (3H, s). **<sup>13</sup>C-NMR** (CDCl<sub>3</sub>, 125 MHz) δ: -4.9, -4.5, 14.5, 18.1, 25.8, 30.0, 58.9, 60.5, 61.1, 61.2, 68.3, 81.4. **HRMS** (MALDI-TOF) *m/z* 311.1643 (calcd for C<sub>14</sub>H<sub>28</sub>O<sub>4</sub>NaSi [M+Na]<sup>+</sup>, 311.1649). [α]<sub>D</sub><sup>23</sup> = +25.4 (c 0.14, CHCl<sub>3</sub>).

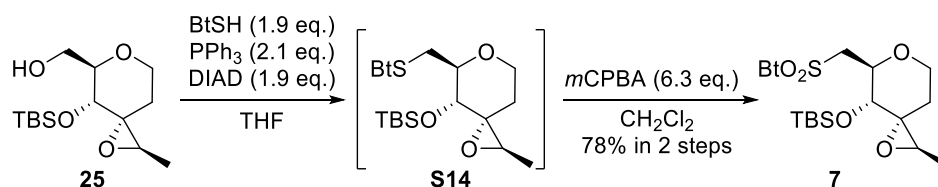

### Compound 7

(Step 1): To a solution of **25** (30.7 mg, 0.106 mmol, 1.0 equiv.) in dry THF (1.0 ml) was added BtSH (34.4 mg, 0.206 mmol, 1.9 equiv.), PPh<sub>3</sub> (57.2 mg, 0.218 mmol, 2.1 equiv.) and DIAD (40 μl, 0.198 mmol, 1.9 equiv.) at room temperature. After stirring for 2 h, the reaction mixture was quenched with H<sub>2</sub>O. The organic compounds were extracted with EtOAc. The organic layers were combined, and the solution was dried over anhydrous Na<sub>2</sub>SO<sub>4</sub>, and concentrated under reduced pressure. The residue was passed through a short silica gel column (*n*-hexane/EtOAc = 8/1) to give the crude **S14**.

(Step 2): To a solution of above **S14** in dry CH<sub>2</sub>Cl<sub>2</sub> (2.0 ml) was added *m*-CPBA (115 mg, 0.666 mmol, 6.3 equiv.) at room temperature. After stirring for 15 h, the reaction mixture was quenched with saturated NaHCO<sub>3</sub> aq and saturated Na<sub>2</sub>S<sub>2</sub>O<sub>3</sub> aq. The organic compounds were extracted with CH<sub>2</sub>Cl<sub>2</sub>. The organic layers were combined, and the solution was dried over anhydrous Na<sub>2</sub>SO<sub>4</sub>, and concentrated under reduced pressure. The residue was purified by silica gel column chromatography (*n*-hexane/EtOAc = 5/1) to give **7** (39.0 mg, 0.083 mmol, 78% in 2 steps) as a colorless amorphous solid.

**<sup>1</sup>H-NMR** (CDCl<sub>3</sub>, 400 MHz) δ: 8.20 (1H, d, *J* = 7.8 Hz), 8.01 (1H, d, *J* = 7.8 Hz), 7.67-7.58 (2H, m), 4.52 (1H, dd, *J* = 6.4, 6.4 Hz), 4.08 (1H, dd, *J* = 14.7, 7.8 Hz), 3.60 (1H, m Hz), 3.55 (1H, m Hz), 3.53 (1H, m Hz), 3.43 (1H, dd, *J* = 14.7, 5.5 Hz), 3.00 (1H, q, *J* = 5.8 Hz), 2.57 (1H, m), 1.43 (3H, d, *J* = 5.8 Hz), 0.9 (9H, s), 0.88 (1H, m), 0.911 (3H, s), 0.09 (3H, s). **<sup>13</sup>C-NMR** (CDCl<sub>3</sub>, 100 MHz) δ: -4.9, -4.6, 14.9, 18.1, 25.7, 29.5, 53.3, 60.2, 60.4, 61.2, 69.9, 74.8, 122.4, 125.3, 127.7, 128.1, 136.8, 152.5, 165.8. **HRMS** (MALDI-TOF) *m/z* 492.1307 (calcd for

C<sub>21</sub>H<sub>31</sub>NO<sub>5</sub>NaSiS<sub>2</sub> [M+Na]<sup>+</sup>, 492.1305). [ $\alpha$ ]<sup>23</sup><sub>D</sub> = -10.2 (c 0.18, CHCl<sub>3</sub>).

Preparation and data for **13** : See reference 4.

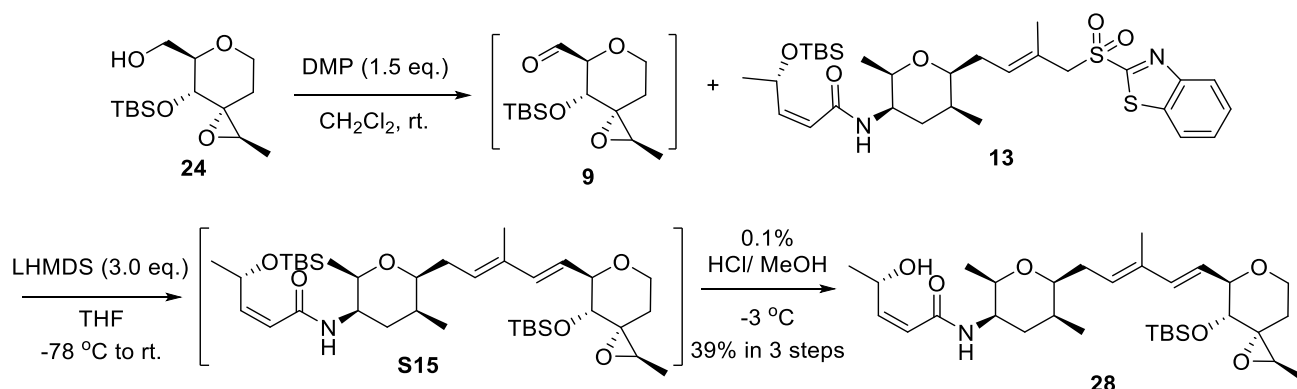

### Compound **28**

(Step 1): To a solution of **24** (30.3 mg, 0.105 mmol, 1.0 equiv.) in dry CH<sub>2</sub>Cl<sub>2</sub> (1.0 ml) was added DMP (66.5 mg, 0.157 mmol, 1.5 equiv.) at room temperature. After stirring for 1 h, the reaction mixture was diluted with Et<sub>2</sub>O and quenched with saturated NaHCO<sub>3</sub> aq and saturated Na<sub>2</sub>S<sub>2</sub>O<sub>3</sub> aq. The organic compounds were extracted with Et<sub>2</sub>O. The organic layers were combined, and the solution was dried over anhydrous Na<sub>2</sub>SO<sub>4</sub>, and concentrated under reduced pressure to give the crude **9** (29.2 mg, 0.101 mmol).

(Step 2): To a solution of **9** (29.2 mg, 0.102 mmol, 1.0 equiv.) and **13** (60.3 mg, 0.099 mmol, 1.0 equiv.) in dry THF (1.0 ml) was added LHMDS (1M THF solution) (0.30 ml, 0.300 mmol, 3.0 equiv.) at -78 °C. After 30 min, the solution was warm to room temperature and stirred for 15 h. The reaction mixture was quenched with saturated NH<sub>4</sub>Cl aq. The organic compounds were extracted with EtOAc. The organic layers were combined, and the solution was dried over anhydrous Na<sub>2</sub>SO<sub>4</sub>, and concentrated under reduced pressure. The residue was passed through a short silica gel column (*n*-hexane/EtOAc = 3/1) to give the crude **S15**.

(Step 3): To **S15** was added 0.1% HCl/ MeOH (2.0 ml) at -3 °C. After stirring for 21 h, the reaction mixture was quenched with saturated NaHCO<sub>3</sub> aq. The organic compounds were extracted with EtOAc. The organic layers were combined, and the solution was dried over anhydrous Na<sub>2</sub>SO<sub>4</sub>, and concentrated under reduced pressure. The residue was purified by silica gel column chromatography (*n*-hexane/EtOAc = 1/1 to 4/6) to give **28** (23.1 mg, 0.041 mmol, 39% in 3 steps) as a colorless amorphous solid.

<sup>1</sup>H-NMR (CDCl<sub>3</sub>, 500 MHz)  $\delta$ : 6.30 (1H, d, *J* = 15.8 Hz), 6.17 (1H, dd, *J* = 12.1, 5.5 Hz), 5.93 (1H, d, *J* = 9.2 Hz), 5.71 (1H, dd, *J* = 12.1, 1.8 Hz), 5.62 (1H, dd, *J* = 15.8, 6.9 Hz), 5.54 (1H, d, *J* = 4.6 Hz), 5.50 (1H, t, *J* = 6.6 Hz), 4.78 (1H, m), 4.37 (1H, d, *J* = 6.9 Hz), 3.93 (1H, m), 3.90-3.83 (2H, m), 3.67 (1H, dq, *J* = 6.3, 2.3 Hz), 3.54 (1H, dt, *J* = 7.2, 2.6 Hz), 3.47 (1H, m), 2.95 (1H, q, *J* = 5.7 Hz), 2.66 (1H, m), 2.39 (1H, m), 2.24 (1H, m), 1.95 (2H, t, *J* = 3.5 Hz), 1.83-1.74 (2H, m), 1.76 (3H, s), 1.34 (3H, d, *J* = 6.9 Hz), 1.30 (3H, d, *J* = 5.7 Hz), 1.14 (3H, d, *J* = 6.3 Hz), 1.01 (3H, d, *J* = 7.5 Hz), 0.92 (9H, s), 0.12 (3H, s), 0.08 (3H, s). <sup>13</sup>C-NMR (CDCl<sub>3</sub>, 125 MHz)  $\delta$ : -4.8, -4.5, 12.7,

15.1, 15.2, 17.8, 18.2, 22.7, 25.8, 28.9, 30.5, 31.9, 35.7, 47.4, 60.5, 61.2, 61.2, 64.6, 71.8, 75.9, 80.8, 81.5, 121.1, 122.5, 129.2, 134.4, 138.1, 150.7, 166.1. **HRMS** (MALDI-TOF)  $m/z$  586.3534 (calcd for  $C_{31}H_{53}NO_6SiNa$   $[M+Na]^+$ , 586.3534).  $[\alpha]_D^{23} = +33.1$  (c 0.15,  $CHCl_3$ ).

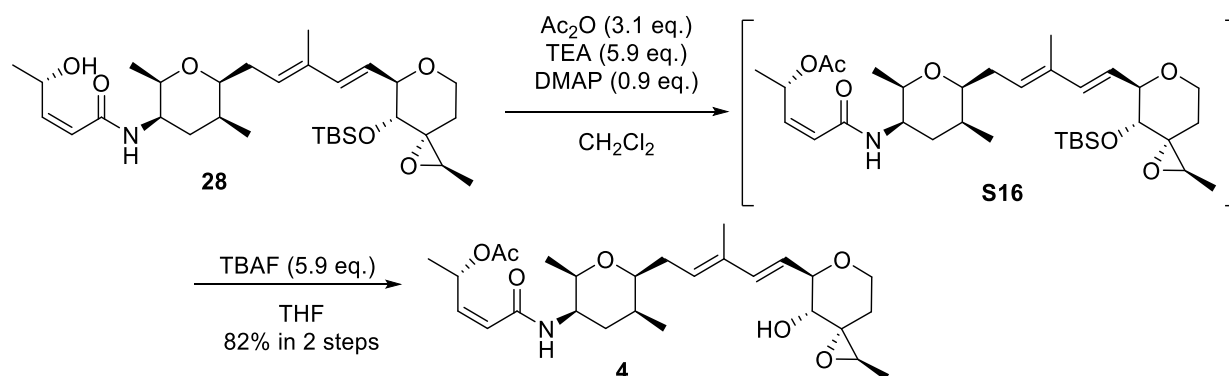

### Compound 4

(Step 1): To a solution of **28** (12.2 mg, 0.022 mmol, 1.0 equiv.) in dry  $CH_2Cl_2$  (1.0 ml) was added TEA (15  $\mu$ l, 0.129 mmol, 5.9 equiv.), DMAP (2.5 mg, 0.020 mmol, 0.9 equiv.) then  $Ac_2O$  (7  $\mu$ l mg, 0.068 mmol, 3.1 equiv.) at room temperature. After stirring for 1 h, the reaction mixture was quenched with saturated  $NH_4Cl$  aq. The organic compounds were extracted with  $CH_2Cl_2$ . The organic layers were combined, and the solution was dried over anhydrous  $Na_2SO_4$ , and concentrated under reduced pressure. The residue was passed through a short silica gel column ( $n$ -hexane/EtOAc = 1/1) to give the crude **S16** (13.2 mg, 0.021 mmol).

(Step 2): To a solution of **S16** (13.2 mg, 0.022 mmol, 1.0 equiv.) in dry THF (1.0 ml) was added TBAF (1M THF solution) (130  $\mu$ l, 0.130 mmol, 5.9 equiv.) at room temperature. After stirring for 1 h, the reaction mixture was quenched with saturated  $NH_4Cl$  aq. The organic compounds were extracted with EtOAc. The organic layers were combined, and the solution was dried over anhydrous  $Na_2SO_4$ , and concentrated under reduced pressure. The residue was purified by silica gel column chromatography ( $n$ -hexane/EtOAc = 1/2) to give **4** (8.7 mg, 0.018 mmol, 82% in 2 steps) as a white solid (mp 96-99  $^{\circ}C$ ).

**$^1H$ -NMR** ( $CDCl_3$ , 500 MHz)  $\delta$ : 6.39 (1H, d,  $J = 16.1$  Hz), 6.28 (1H, m), 6.02 (1H, d,  $J = 9.2$  Hz), 5.89 (1H, dd,  $J = 11.5, 7.5$  Hz), 5.75-5.67 (2H, m), 5.50 (1H, t,  $J = 7.2$  Hz), 3.97-3.90 (2H, m), 3.81 (1H, m), 3.71 (1H, dt,  $J = 11.5, 2.9$  Hz), 3.68-3.62 (2H, m), 3.51 (1H, dt,  $J = 6.9, 2.9$  Hz), 2.93 (1H, q,  $J = 6.3$  Hz), 2.38 (1H, m), 2.21 (1H, m), 2.14 (1H, m), 2.04 (3H, s), 1.98-1.89 (3H, m), 1.79-1.77 (1H, m), 1.77 (3H, s), 1.53 (3H, d,  $J = 6.3$  Hz), 1.44 (1H, m), 1.38 (3H, d,  $J = 6.3$  Hz), 1.14 (3H, d,  $J = 6.3$  Hz), 1.00 (3H, d,  $J = 7.5$  Hz).  **$^{13}C$ -NMR** ( $CDCl_3$ , 125 MHz)  $\delta$ : 12.6, 13.7, 15.0, 17.8, 20.0, 21.2, 28.9, 31.9, 34.1, 35.8, 47.1, 60.9, 61.6, 64.2, 68.6, 68.9, 75.9, 80.8, 81.5, 122.5, 123.8, 129.1, 134.6, 138.2, 143.6, 164.9, 170.4. **HRMS** (MALDI-TOF)  $m/z$  514.2775 (calcd for  $C_{27}H_{41}NO_7Na$   $[M+Na]^+$ , 514.2775).  $[\alpha]_D^{23} = -33.1$  (c 0.02,  $CHCl_3$ ).

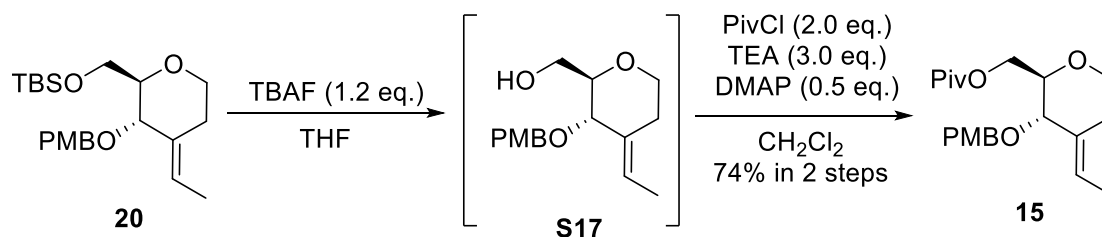

### Compound 15

(Step 1): To a solution of **20** (2.45 g, 6.24 mmol, 1.0 equiv.) in dry THF (35 ml) was added TBAF (1M THF solution) (7.5 ml, 7.50 mmol, 1.2 equiv.) at room temperature. After stirring for 12 h, the reaction mixture was quenched with saturated  $\text{NH}_4\text{Cl}$  aq. The organic compounds were extracted with EtOAc. The organic layers were combined, and the solution was dried over anhydrous  $\text{Na}_2\text{SO}_4$ , and concentrated under reduced pressure. The residue was passed through a short silica gel column ( $n$ -hexane/EtOAc = 1/1) to give the crude **S17** (1.40 g, 5.03 mmol).

(Step 2): To a solution of **S17** (1.40 g, 5.03 mmol, 1.0 equiv.) in dry  $\text{CH}_2\text{Cl}_2$  (20 ml) were added PivCl (1.24 g, 10.3 mmol, 2.0 equiv.), TEA (1.53 g, 15.1 mmol, 3.0 equiv.) and DMAP (309 mg, 2.53 mmol, 0.5 equiv.) at room temperature. After stirring for 3 h, the reaction mixture was quenched with saturated  $\text{NH}_4\text{Cl}$  aq. The organic compounds were extracted with  $\text{CH}_2\text{Cl}_2$ . The organic layers were combined, and the solution was dried over anhydrous  $\text{Na}_2\text{SO}_4$ , and concentrated under reduced pressure. The residue was purified by silica gel column chromatography ( $n$ -hexane/EtOAc = 10/1) to give **16** (1.68 g, 4.63 mmol, 74% in 2 steps) as a colorless oil.

$^1\text{H-NMR}$  ( $\text{CDCl}_3$ , 400 MHz)  $\delta$ : 7.26 (2H, d,  $J = 8.7$  Hz), 6.88 (2H, d,  $J = 8.7$  Hz), 5.61 (1H, q,  $J = 6.9$  Hz), 4.57 (1H, d,  $J = 11.0$  Hz), 4.33 (1H, d,  $J = 11.0$  Hz), 4.30-4.20 (2H, m), 3.91 (1H, m), 3.80 (3H, s), 3.69 (1H, m), 3.50 (1H, m), 3.44 (1H, dt,  $J = 10.5, 3.2$  Hz), 2.57 (1H, m), 2.12 (1H, m), 1.67 (3H, d,  $J = 6.9$  Hz), 1.19 (9H, s).  $^{13}\text{C-NMR}$  ( $\text{CDCl}_3$ , 100 MHz)  $\delta$ : 12.5, 27.2, 27.8, 38.8, 55.2, 63.3, 66.8, 71.7, 77.6, 79.3, 113.8, 117.1, 129.5, 130.0, 133.4, 159.2, 178.2. **HRMS** (MALDI-TOF)  $m/z$  385.1980 (calcd for  $\text{C}_{21}\text{H}_{30}\text{O}_5\text{Na}$   $[\text{M}+\text{Na}]^+$ , 385.1986).  $[\alpha]_D^{23} = +86.6$  (c 0.20,  $\text{CHCl}_3$ ).

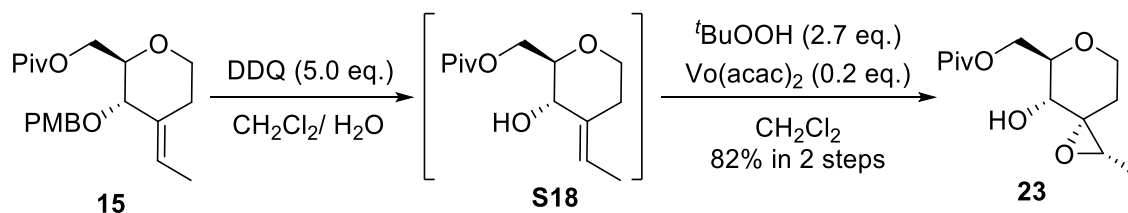

### Compound 23

(Step 1): To a solution of **15** (2.40 g, 6.62 mmol, 1.0 equiv.) in  $\text{CH}_2\text{Cl}_2/\text{H}_2\text{O}$  (10 : 1, 150 ml) was added DDQ (7.51 g, 33.1 mmol, 5.0 equiv.) at room temperature. After stirring for 12 h, the reaction mixture was quenched with saturated  $\text{NaHCO}_3$  aq and saturated  $\text{Na}_2\text{S}_2\text{O}_3$  aq. The organic compounds were extracted with  $\text{CH}_2\text{Cl}_2$ . The organic layers were combined, and the solution was dried over anhydrous  $\text{Na}_2\text{SO}_4$ , and concentrated under reduced pressure. The residue was passed through a short silica gel column ( $n$ -hexane/EtOAc = 3/1) to give the crude **S18**.



(Step 2): To a solution of **S18** in dry CH<sub>2</sub>Cl<sub>2</sub> (60 ml) were added <sup>t</sup>BuOOH (5.5M in decane solution) (3.2 ml, 17.6 mmol, 2.7 equiv.) and Vo(acac)<sub>2</sub> (311 mg, 1.17 mmol, 0.2 equiv.) at room temperature. After stirring for 1 h, the reaction mixture was quenched with saturated NaHCO<sub>3</sub> aq and saturated Na<sub>2</sub>S<sub>2</sub>O<sub>3</sub> aq. The organic compounds were extracted with CH<sub>2</sub>Cl<sub>2</sub>. The organic layers were combined, and the solution was dried over anhydrous Na<sub>2</sub>SO<sub>4</sub>, and concentrated under reduced pressure. The residue was purified by silica gel column chromatography (*n*-hexane/EtOAc = 2/1) to give **23** (1.41 g, 5.46 mmol, 82% in 2 steps) as a colorless oil.

<sup>1</sup>H-NMR (CDCl<sub>3</sub>, 300 MHz) δ: 4.40 (1H, dd, *J* = 11.9, 2.3 Hz), 4.30 (1H, dd, *J* = 11.9, 5.0 Hz), 4.02 (1H, ddd, *J* = 10.1, 5.5, 1.4 Hz), 3.69-3.57 (2H, m), 3.43 (1H, q, *J* = 6.0 Hz), 3.42-3.30 (2H, m), 2.09 (1H, m), 1.98 (1H, d, *J* = 10.6 Hz), 1.55 (3H, m), 1.23 (9H, s). <sup>13</sup>C-NMR (CDCl<sub>3</sub>, 100 MHz) δ: 12.6, 27.1, 28.6, 38.9, 54.4, 61.7, 64.1, 65.1, 65.3, 78.6, 178.7. HRMS (MALDI-TOF) *m/z* 281.1359 (calcd for C<sub>13</sub>H<sub>22</sub>O<sub>5</sub>Na [M+Na]<sup>+</sup>, 281.1359). [α]<sub>D</sub><sup>23</sup> = +10.9 (c 0.10, CHCl<sub>3</sub>).

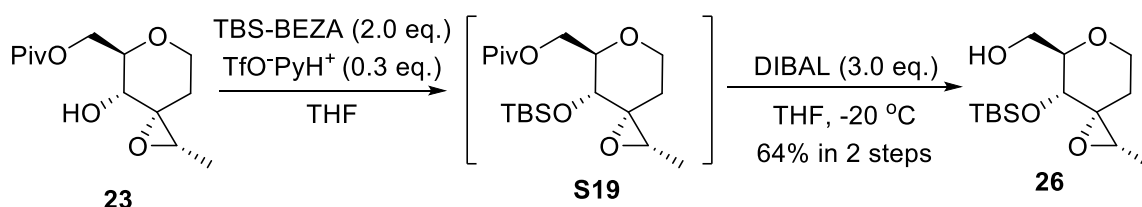

### Compound 26

(Step 1): To a solution of **26** (810 mg, 3.14 mmol, 1.0 equiv.) in dry THF (8.0 ml) was added TBS-BEZA (1955 mg, 6.28 mmol, 2.0 equiv.) and TfO·PyH<sup>+</sup> (185 mg, 0.807 mmol, 0.3 equiv.) at room temperature. After stirring for 12 h, the reaction mixture was quenched with saturated NaHCO<sub>3</sub> aq. The organic compounds were extracted with EtOAc. The organic layers were combined, and the solution was dried over anhydrous Na<sub>2</sub>SO<sub>4</sub>, and concentrated under reduced pressure. The residue was passed through a short silica gel column (*n*-hexane/EtOAc = 7/1) to give the crude **S19** (910 mg, 2.44 mmol).

(Step 2): To a solution of **S19** (910 mg, 2.44 mmol, 1.0 equiv.) in dry THF (24 ml) was added DIBAL (1M toluene solution) (7.3 ml, 7.30 mmol, 3.0 equiv.) at -20 °C. After stirring for 1 h, the reaction mixture was quenched with saturated potassium sodium tartrate aq. The organic compounds were extracted with EtOAc. The organic layers were combined, and the solution was dried over anhydrous Na<sub>2</sub>SO<sub>4</sub>, and concentrated under reduced pressure. The residue was purified by silica gel column chromatography (*n*-hexane/EtOAc = 2/1) to give **26** (577 mg, 2.00 mmol, 64% in 2 steps) as a colorless oil.

<sup>1</sup>H-NMR (CDCl<sub>3</sub>, 300 MHz) δ: 4.00 (1H, ddd, *J* = 11.0, 5.5, 1.8 Hz), 3.79 (1H, m), 3.75 (1H, d, *J* = 4.1 Hz), 3.72 (1H, m), 3.63 (1H, m), 3.53 (1H, ddd, *J* = 8.7, 5.0, 2.7 Hz), 3.34 (1H, q, *J* = 5.5 Hz), 1.97 (1H, m), 1.94 (1H, t, *J* = 6.4 Hz), 1.50 (1H, m), 1.27 (3H, d, *J* = 5.5 Hz), 0.90 (9H, s), 0.11 (3H, s), 0.05 (3H, s). <sup>13</sup>C-NMR (CDCl<sub>3</sub>, 100 MHz) δ: -4.8, -4.7, 12.8, 18.0, 25.7, 29.6, 54.6, 62.1, 62.8, 65.0, 67.2, 79.5. HRMS (MALDI-TOF) *m/z* 311.1645 (calcd for C<sub>14</sub>H<sub>28</sub>O<sub>4</sub>SiNa [M+Na]<sup>+</sup>, 311.1649). [α]<sub>D</sub><sup>23</sup> = +59.0 (c 0.19, CHCl<sub>3</sub>).

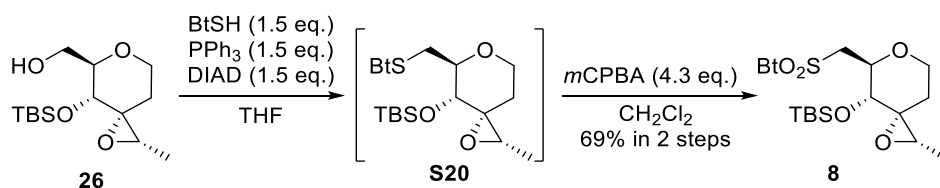

### Compound 8

(Step 1): To a solution of **26** (150 mg, 0.520 mmol, 1.0 equiv.) in dry THF (3.5 ml) was added BtSH (131 mg, 0.783 mmol, 1.5 equiv.), PPh<sub>3</sub> (205 mg, 0.782 mmol, 1.5 equiv.) and DIAD (0.15 ml, 0.78 mmol, 1.5 equiv.) at room temperature. After stirring for 2 h, the reaction mixture was quenched with H<sub>2</sub>O. The organic compounds were extracted with EtOAc. The organic layers were combined, and the solution was dried over anhydrous Na<sub>2</sub>SO<sub>4</sub>, and concentrated under reduced pressure. The residue was passed through a short silica gel column (*n*-hexane/EtOAc = 7/1) to give the crude **S20**.

(Step 2): To a solution of above **S20** in dry CH<sub>2</sub>Cl<sub>2</sub> (2.0 ml) was added *m*-CPBA (382 mg, 2.21 mmol, 4.3 equiv.) at room temperature. After stirring for 2 h, the reaction mixture was quenched with saturated NaHCO<sub>3</sub> aq and saturated Na<sub>2</sub>S<sub>2</sub>O<sub>3</sub> aq. The organic compounds were extracted with CH<sub>2</sub>Cl<sub>2</sub>. The organic layers were combined, and the solution was dried over anhydrous Na<sub>2</sub>SO<sub>4</sub>, and concentrated under reduced pressure. The residue was purified by silica gel column chromatography (*n*-hexane/EtOAc = 3/1) to give **8** (170 mg, 0.361 mmol, 69% in 2 steps) as a white solid (mp 145-148 °C).

**<sup>1</sup>H-NMR** (CDCl<sub>3</sub>, 400 MHz) δ: 8.20 (1H, d, *J* = 8.1 Hz), 8.00 (1H, d, *J* = 8.1 Hz), 7.64-7.55 (2H, m), 4.15 (1H, m), 3.82 (1H, dd, *J* = 14.7, 2.3 Hz), 3.72 (1H, dd, *J* = 14.7, 10.1 Hz), 3.61-3.56 (2H, m), 3.56 (1H, d, *J* = 8.7 Hz), 3.26 (1H, q, *J* = 5.8 Hz), 1.84 (1H, m), 1.44 (1H, m), 1.23 (3H, d, *J* = 5.8 Hz), 0.90 (9H, s), 0.11 (3H, s), 0.04 (3H, s). **<sup>13</sup>C-NMR** (CDCl<sub>3</sub>, 100 MHz) δ: -4.5, -4.2, 12.7, 18.0, 25.6, 29.0, 54.9, 57.0, 62.1, 64.9, 69.9, 74.8, 122.2, 125.4, 127.4, 127.8, 136.9, 152.5, 167.0. **HRMS** (MALDI-TOF) *m/z* 492.1311 (calcd for C<sub>21</sub>H<sub>31</sub>NO<sub>5</sub>NaSi<sub>2</sub> [M+Na]<sup>+</sup>, 492.1305). [α]<sup>23</sup><sub>D</sub> = +5.95 (c 0.20, CHCl<sub>3</sub>).

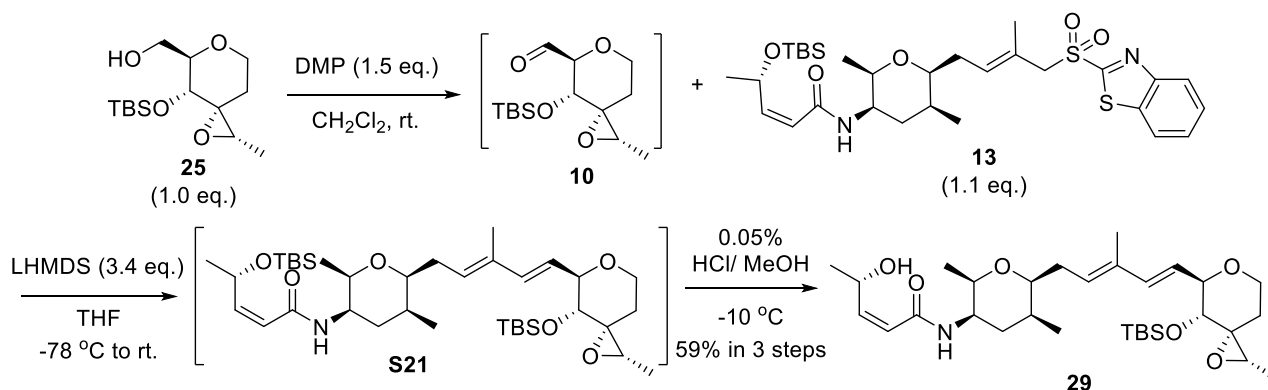

### Compound 29

(Step 1): To a solution of **25** (33.5 mg, 0.116 mmol, 1.0 equiv.) in dry CH<sub>2</sub>Cl<sub>2</sub> (1.1 ml) was added DMP (76.0 mg,

0.179 mmol, 1.5 equiv.) at room temperature. After stirring for 2 h, the reaction mixture was diluted with Et<sub>2</sub>O and quenched with saturated NaHCO<sub>3</sub> aq and saturated Na<sub>2</sub>S<sub>2</sub>O<sub>3</sub> aq. The organic compounds were extracted with Et<sub>2</sub>O. The organic layers were combined, and the solution was dried over anhydrous Na<sub>2</sub>SO<sub>4</sub>, and concentrated under reduced pressure to give the crude **10**.

(Step 2): To a solution of **13** (75.1 mg, 0.124 mmol, 1.1 equiv.) and **10** in dry THF (1.2 ml) was added LHMDs (1M THF solution) (0.4 ml, 0.400 mmol, 3.4 equiv.) at -78 °C. After 30 min, the solution was warm to room temperature and stirred for 23 h. The reaction mixture was quenched with saturated NH<sub>4</sub>Cl aq. The organic compounds were extracted with EtOAc. The organic layers were combined, and the solution was dried over anhydrous Na<sub>2</sub>SO<sub>4</sub>, and concentrated under reduced pressure. The residue was passed through a short silica gel column (*n*-hexane/EtOAc = 3/1) to give the crude **S21**.

(Step 3): To **S21** was added 0.05% HCl/ MeOH (3.0 ml) at -10 °C. After stirring for 12 h, the reaction mixture was quenched with saturated NaHCO<sub>3</sub> aq. The organic compounds were extracted with EtOAc. The organic layers were combined, and the solution was dried over anhydrous Na<sub>2</sub>SO<sub>4</sub>, and concentrated under reduced pressure. The residue was purified by silica gel column chromatography (*n*-hexane/EtOAc = 1/1) to give **29** (38.2 mg, 0.068 mmol, 59% in 3 steps) as a colorless amorphous solid.

**<sup>1</sup>H-NMR** (CDCl<sub>3</sub>, 500 MHz) δ: 6.29 (1H, d, *J* = 15.8 Hz), 6.17 (1H, dd, *J* = 12.1, 5.2 Hz), 5.93 (1H, d, *J* = 9.2 Hz), 5.70 (1H, dd, *J* = 12.1, 1.7 Hz), 5.58 (1H, d, *J* = 4.6 Hz), 5.52 (1H, dd, *J* = 15.8, 6.9 Hz), 5.44 (1H, t, *J* = 7.2 Hz), 4.77 (1H, m), 4.02-3.90 (3H, m), 3.75 (1H, dt, *J* = 12.1, 2.3 Hz), 3.65 (1H, m), 3.55 (1H, d, *J* = 8.6 Hz), 3.52 (1H, m), 3.33 (1H, q, *J* = 5.6 Hz), 2.37 (1H, m), 2.24 (1H, m), 1.99 (1H, m), 1.93 (2H, m), 1.76 (1H, m), 1.74 (3H, s), 1.52 (1H, m), 1.34 (3H, d, *J* = 6.3 Hz), 1.26 (3H, d, *J* = 5.6 Hz), 1.12 (3H, d, *J* = 6.3 Hz), 0.98 (3H, d, *J* = 7.5 Hz), 0.84 (9H, s), 0.003 (3H, s), -0.041 (3H, s). **<sup>13</sup>C-NMR** (CDCl<sub>3</sub>, 125 MHz) δ: -4.5, -4.2, 12.5, 12.9, 15.1, 17.8, 18.0, 22.7, 25.7, 28.8, 29.7, 31.9, 35.7, 47.5, 54.9, 62.9, 64.6, 64.9, 71.3, 75.8, 80.9, 81.0, 122.5, 124.5, 128.5, 134.5, 138.0, 150.7, 166.1. **HRMS** (MALDI-TOF) *m/z* 586.3535 (calcd for C<sub>31</sub>H<sub>53</sub>NO<sub>6</sub>SiNa [M+Na]<sup>+</sup>, 586.3534). [α]<sub>D</sub><sup>23</sup> = +5.94 (c 0.09, CHCl<sub>3</sub>).

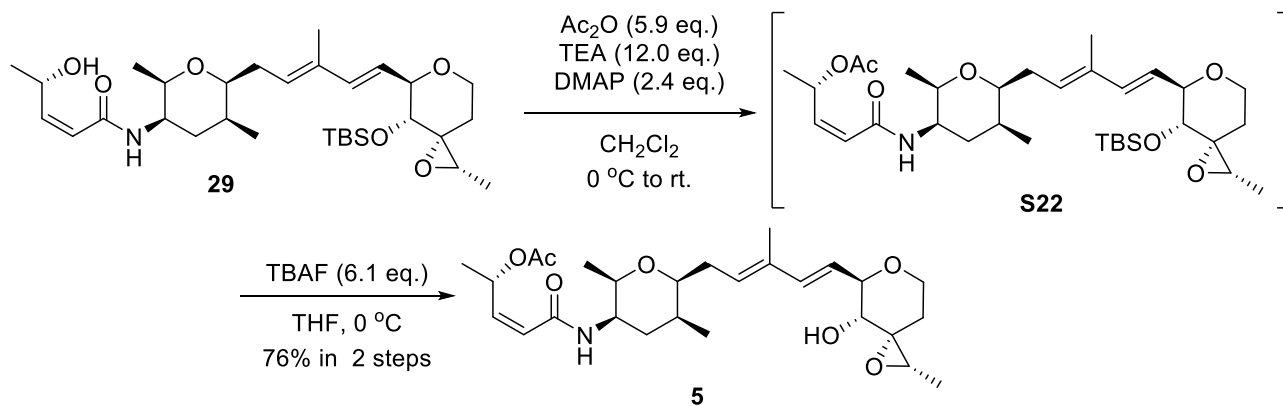

## Compound 5

(Step 1): To a solution of **29** (38.2 mg, 0.068 mmol, 1.0 equiv.) in dry CH<sub>2</sub>Cl<sub>2</sub> (2.0 ml) was added TEA (82.3 mg, 0.813 mmol, 12.0 equiv.), DMAP (20.2 mg, 0.165 mmol, 2.4 equiv.) then Ac<sub>2</sub>O (38  $\mu$ l, 0.402 mmol, 5.9 equiv.) at 0 °C and the gradually warm to room temperature. After stirring for 1 h, the reaction mixture was quenched with saturated NH<sub>4</sub>Cl aq. The organic compounds were extracted with CH<sub>2</sub>Cl<sub>2</sub>. The organic layers were combined, and the solution was dried over anhydrous Na<sub>2</sub>SO<sub>4</sub>, and concentrated under reduced pressure. The residue was passed through a short silica gel column (*n*-hexane/EtOAc = 3/1) to give the crude **S22** (34.5 mg, 0.057 mmol).

(Step 2): To a solution of crude **S22** (34.5 mg, 0.057 mmol, 1.0 equiv.) in dry THF (3.0 ml) was added TBAF (1M THF solution) (0.35 ml, 0.350 mmol, 6.1 equiv.) at 0 °C. After stirring for 12 h, the reaction mixture was quenched with saturated NH<sub>4</sub>Cl aq. The organic compounds were extracted with EtOAc. The organic layers were combined, and the solution was dried over anhydrous Na<sub>2</sub>SO<sub>4</sub>, and concentrated under reduced pressure. The residue was purified by silica gel column chromatography (*n*-hexane/EtOAc = 1/2) to give **5** (25.8 mg, 0.052 mmol, 76% in 2 steps) as a white solid (mp 92-95 °C).

**<sup>1</sup>H-NMR** (CDCl<sub>3</sub>, 500 MHz)  $\delta$ : 6.38 (1H, d, *J* = 15.5 Hz), 6.25 (1H, m), 6.01 (1H, d, *J* = 9.2 Hz), 5.88 (1H, dd, *J* = 10.1, 6.7 Hz), 5.71 (1H, m), 5.68 (1H, m), 5.49 (1H, t, *J* = 6.9 Hz), 4.04 (1H, d, *J* = 11.5, 4.6 Hz), 3.92 (1H, m), 3.73-3.68 (2H, m), 3.65 (1H, m), 3.54-3.49 (2H, m), 3.43 (1H, q, *J* = 5.7 Hz), 2.38 (1H, m), 2.22 (1H, m), 2.12 (1H, m), 2.03 (3H, s), 1.98-1.89 (2H, m), 1.79 (1H, m), 1.77 (3H, s), 1.71 (1H, d, *J* = 10.3 Hz), 1.57 (1H, m), 1.38 (3H, d, *J* = 6.9 Hz), 1.30 (3H, d, *J* = 5.7 Hz), 1.13 (3H, d, *J* = 6.3 Hz), 1.00 (3H, d, *J* = 7.5 Hz). **<sup>13</sup>C-NMR** (CDCl<sub>3</sub>, 125 MHz)  $\delta$ : 12.6, 12.7, 15.0, 17.8, 20.0, 21.2, 28.8, 28.9, 31.9, 35.8, 47.1, 54.4, 61.9, 64.9, 68.9, 69.2, 75.9, 80.8, 80.9, 122.5, 124.3, 129.0, 134.6, 137.9, 143.6, 164.8, 170.3. **HRMS** (MALDI-TOF) *m/z* 514.2772 (calcd for C<sub>27</sub>H<sub>41</sub>NO<sub>7</sub>Na [M+Na]<sup>+</sup>, 514.2775). [ $\alpha$ ]<sub>D</sub><sup>23</sup> = -37.9 (c 0.02, CHCl<sub>3</sub>).

## **5. Analytical RP-HPLC**

HPLC purity determination of compound **3**, **4** and **5** was performed on a reversed CEL (Mightysil RP-18 GP 250-10).

### **Compound 3**

Purity is > 95%. Condition : eluting with acetonitrile and water (70 : 30, 0.2 ml/ min) over 30 min. UV detection ( $\lambda$  = 254 nm)

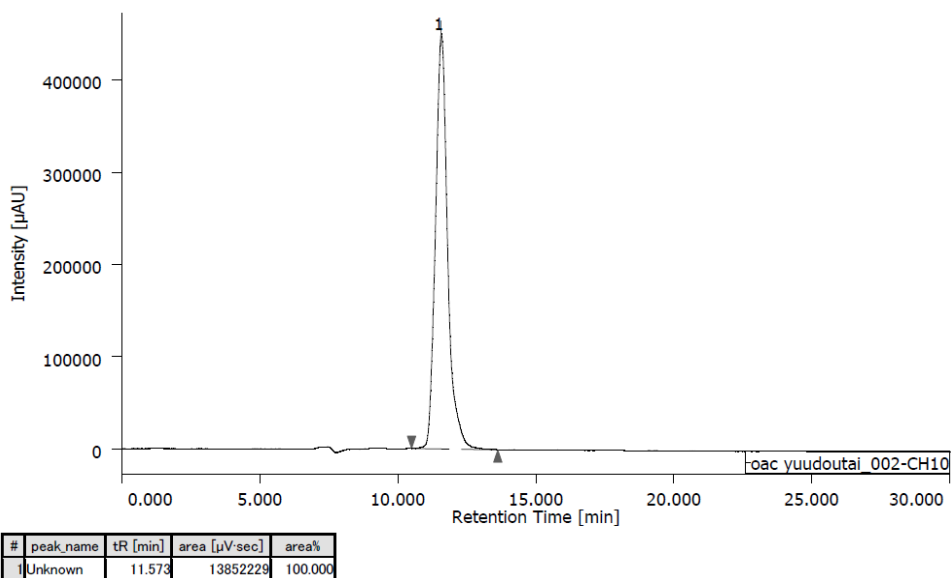

**Compound 4**

Purity is > 95%. Condition : eluting with acetonitrile and water (60 : 40, 0.4 ml/ min) over 30 min. UV detection ( $\lambda$  = 210 nm)

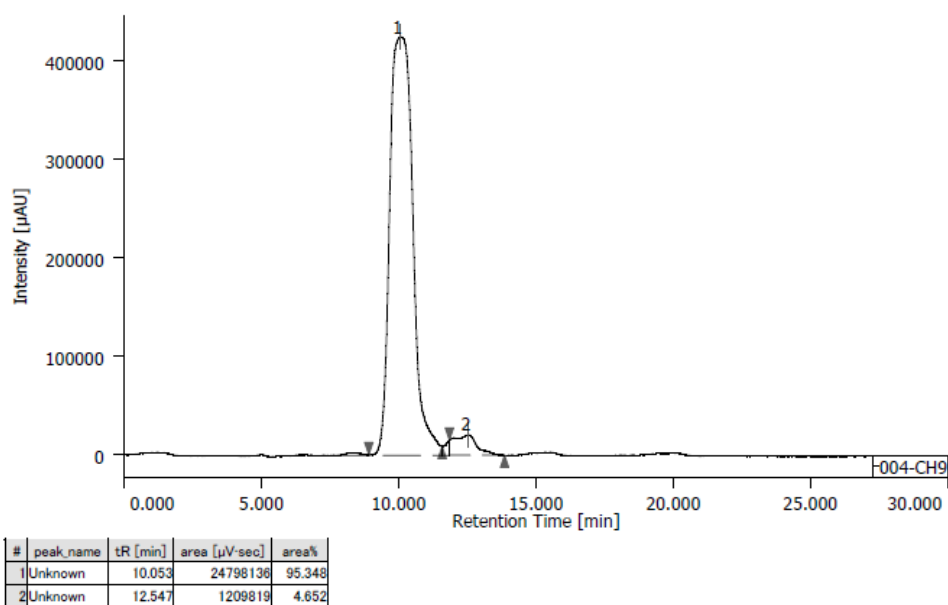

**Compound 5**

Purity is > 95%. Condition : eluting with acetonitrile and water (80 : 20, 0.3 ml/ min) over 20 min. UV detection ( $\lambda$  = 210 nm)

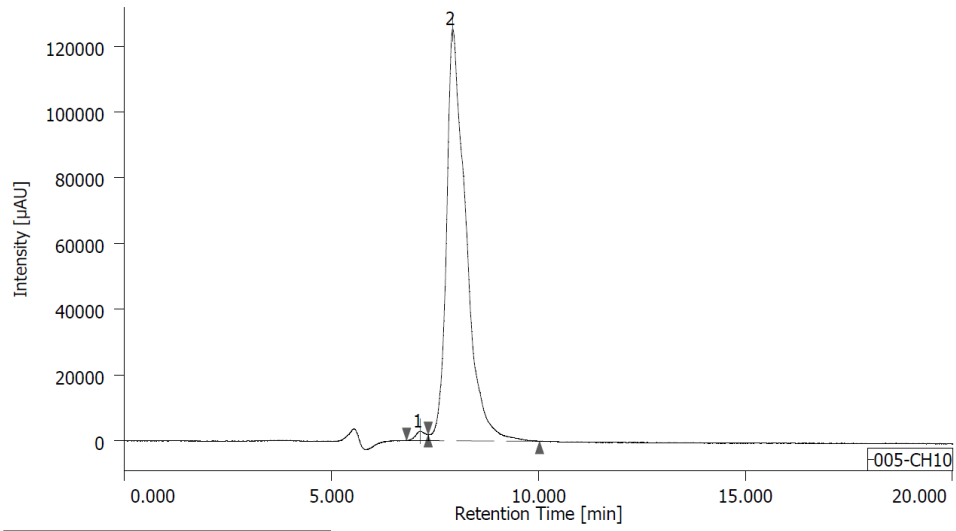

| # | peak_name | tR [min] | area [µV·sec] | area%  |
|---|-----------|----------|---------------|--------|
| 1 | Unknown   | 7.147    | 49160         | 1.193  |
| 2 | Unknown   | 7.933    | 4072958       | 98.807 |

## **6. Biological Assay**

Method

AR-V7-GFP splicing assay. AR-V7-GFP CWR22Rv1 cell was previously established and cultured as previously described<sup>5</sup>. GFP signals can be used for quantitative examination of AR-V7 splicing in this system. After three days of treatment, GFP expression was measured by FACS Aria II (BD Biosciences) as previously described. IC<sub>50</sub> was calculated using approximate curves<sup>5</sup>.

*In vivo* toxicity test. Animal experiments were approved by the Osaka University Animal Experiments committee and were performed following the guidelines. Spliceostain A or its derivatives (**3-5**) were intraperitoneally injected into eight to ten-week-old C57BL/6 male mice with 300  $\mu$ l PBS containing 10% DMSO three times on every other day. Body weight was measured on every other day.

### AR-V7-GFP expression assay for **3, 4, 5**

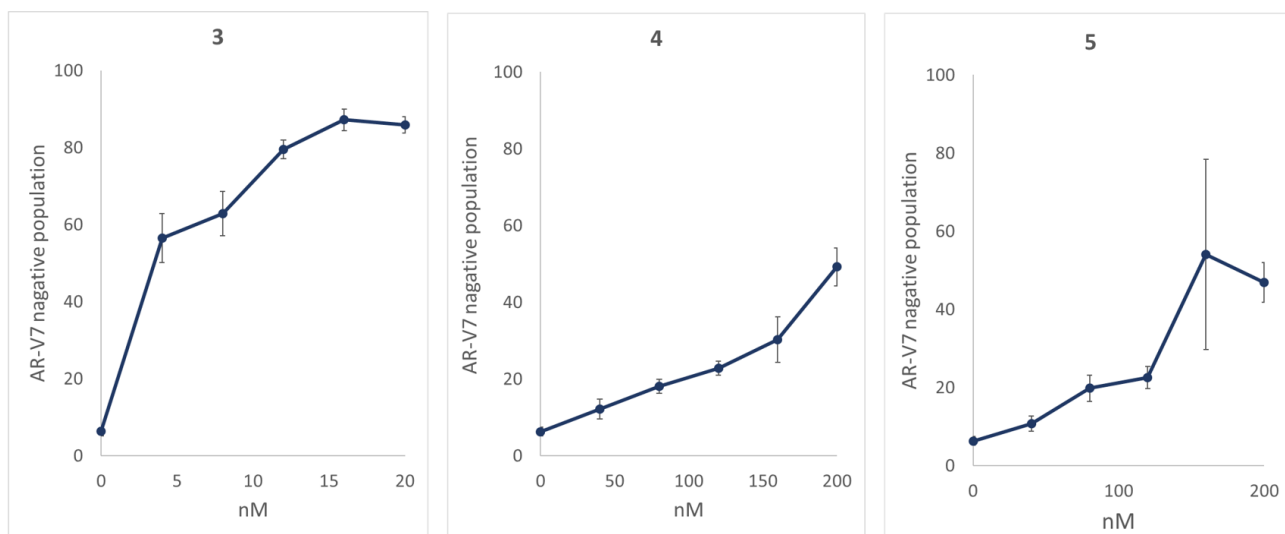

## 7. Reference

- 1) Catino, A. J.; Sherlock, A.; Shieh, P.; Wzorek, J. S.; Evans, D. A. *Org. Lett.* **2013**, *15*, 3330-3333.
- 2) Yoshikawa, Y.; Ishibashi, A.; Murai, K.; Kaneda, Y.; Nimura, K.; Arisawa, M. *Tetrahedron Lett.* 10.1016/j.tetlet.2019.151313.
- 3) Fujiwara, T.; Hayashi, M. *J. Org. Chem.* **2008**, *73*, 9161-9163.
- 4) Motoyoshi, H.; Horigome, M.; Watanabe, H.; Kitahara, T. *Tetrahedron* **2006**, *62*, 1378-1389
- 5) N. Kawamura, K. Nimura, K. Saga, A. Ishibashi, K. Kitamura, H. Nagano, Y. Yoshikawa, K. Ishida, N. Nonomura, M. Arisawa, J. Luo and Y. Kaneda, *Can. Res.* **2019**, *79*, 5204-5217.

## 8. NMR Spectra

single pulse

F:\SAA論文\NMR\muchikan OPMP olefin2 proton-1-1.als

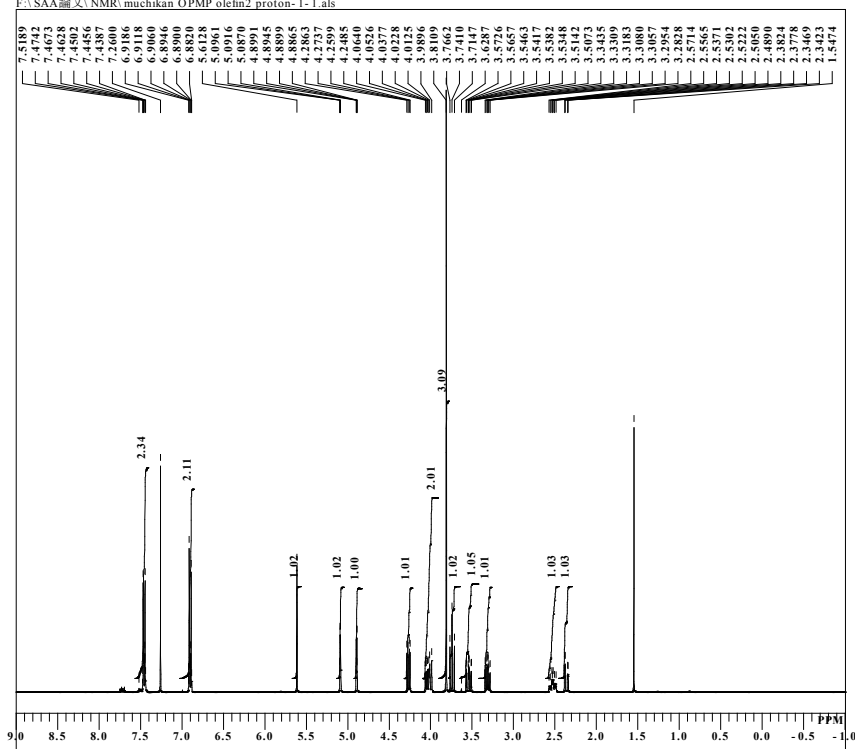

```

DFILE muchikan OPMP olefin2 proton-1-1.ah
COMNT single_pulse
DATIM 2019-07-24 16:54:59
OBNUC 13C
EXMOD proton.jxp
OBFRQ 399.78 MHz
OBSET 4.19 KHz
OBFIN 7.29 Hz
POINT 13107
FREQU 6002.40 Hz
SCANS 5
ACQTM 2.1837 sec
PD 10.0000 sec
PWI 7.25 usec
IRNUC 1H
CTEMP 22.6 c
SLVNT CDCL3
EXREF 7.26 ppm
BF 0.12 Hz
RGAIN 48
    
```

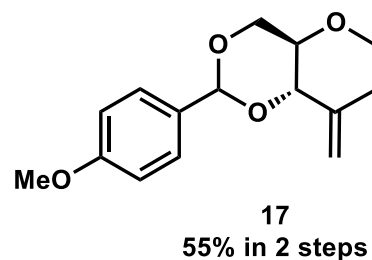

single pulse decoupled gated NOE

F:\SAA論文\NMR\muchikan OPMP olefin carbon-1-1.als

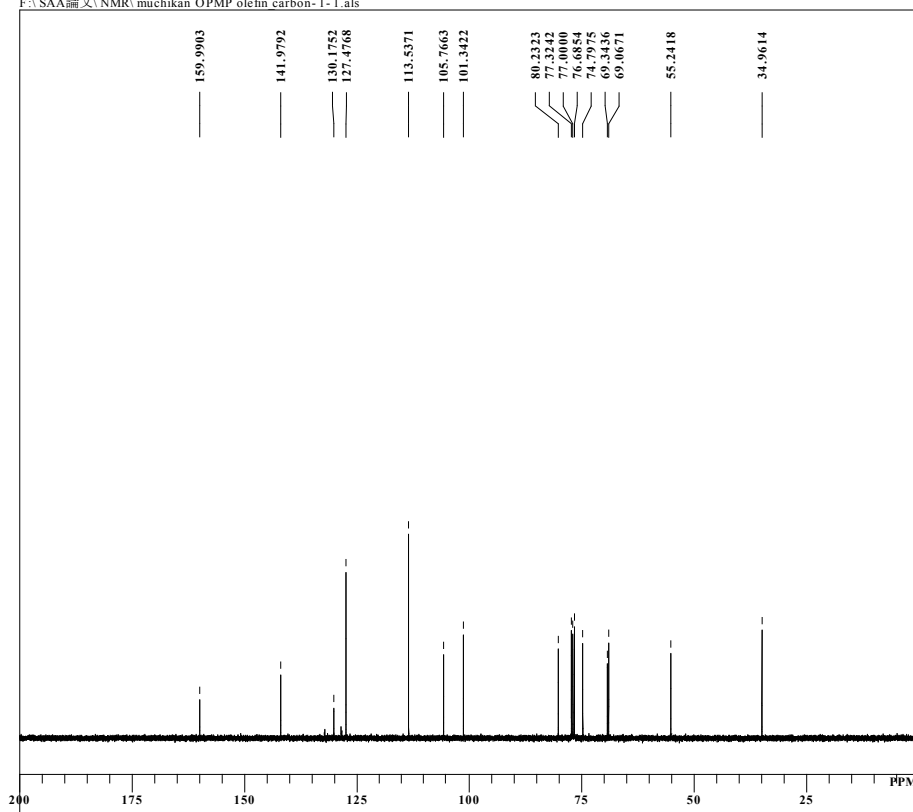

```

DFILE muchikan OPMP olefin carbon-1-1.als
COMNT single pulse decoupled gated NOE
DATIM 2019-07-24 17:42:03
OBNUC 13C
EXMOD carbon.jxp
OBFRQ 100.53 MHz
OBSET 5.35 KHz
OBFIN 5.86 Hz
POINT 26214
FREQU 25125.63 Hz
SCANS 176
ACQTM 1.0433 sec
PD 1.0000 sec
PWI 3.17 usec
IRNUC 1H
CTEMP 22.8 c
SLVNT CDCL3
EXREF 77.00 ppm
BF 0.12 Hz
RGAIN 60
    
```



single pulse

F:\SAA論文\NMR\muchikan OPiv OPMB olefin proton-1-1.als

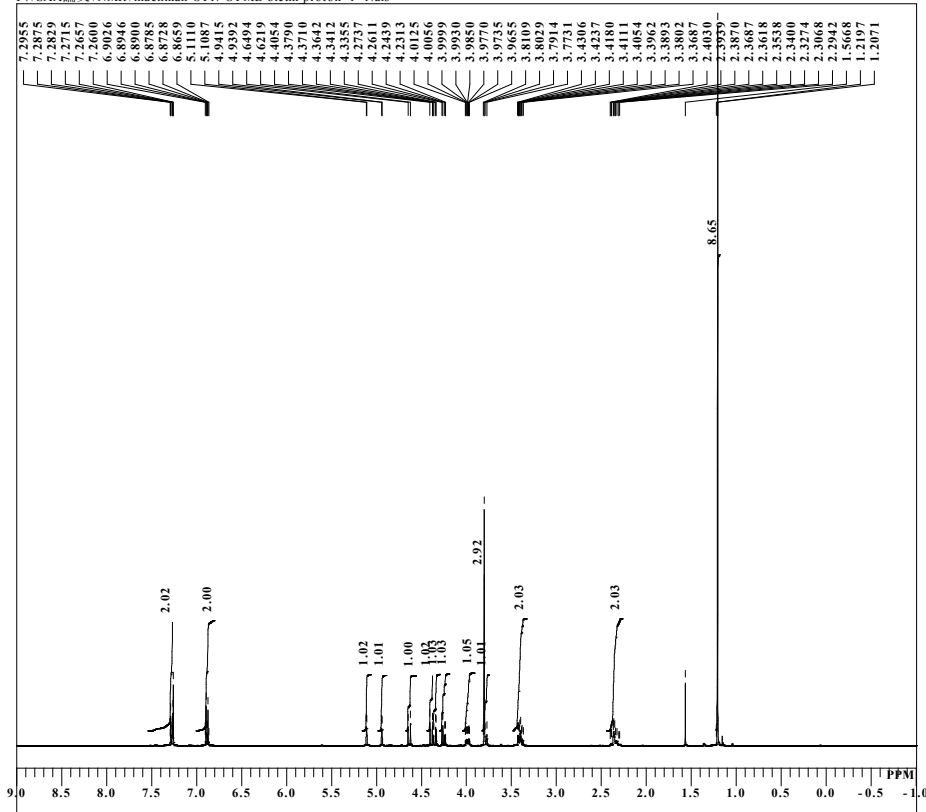

```

DFILE      muchikan OPiv OPMB olefin proton-1-
COMINT     single pulse
DATIM      2019-05-20 15:13:09
OBNUC      1H
EXMOD      proton.jsp
OBFREQ     399.78 MHz
OBSET      4.19 KHz
OBFIN      7.29 Hz
POINT      13107
FREQU      6002.40 Hz
SCANS      11
ACQTM      2.1837 sec
PD          1.0000 sec
PW1         7.25 usec
IRNUC      1H
CTEMP      20.9 c
SLVNT      CDCL3
EXREF      7.26 ppm
BF          0.12 Hz
RGAIN      46
    
```

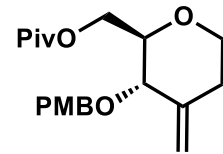

**13**  
87% in 2 steps

single pulse decoupled gated NOE

F:\SAA論文\NMR\muchikan OPiv OPMB olefin Carbon-1-1.als

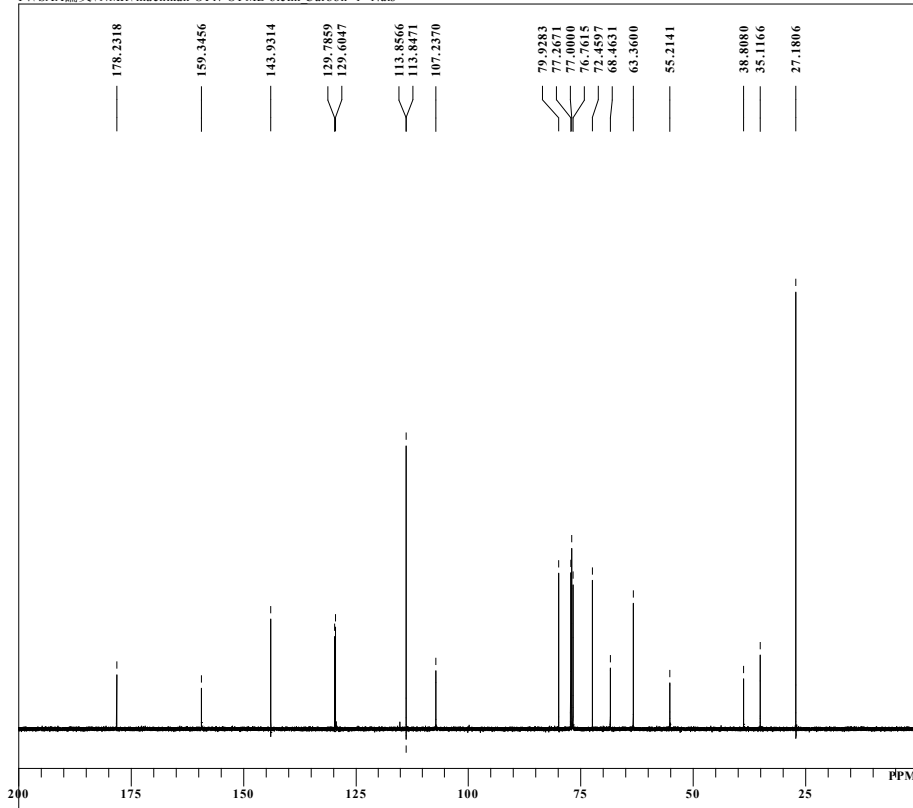

```

DFILE      muchikan OPiv OPMB olefin Carbon-1-
COMINT     single pulse decoupled gated NOE
DATIM      2019-05-20 14:58:39
OBNUC      13C
EXMOD      carbon.jsp
OBFREQ     125.77 MHz
OBSET      7.87 KHz
OBFIN      4.21 Hz
POINT      26214
FREQU      31446.54 Hz
SCANS      87
ACQTM      0.8336 sec
PD          3.0000 sec
PW1         3.27 usec
IRNUC      1H
CTEMP      20.5 c
SLVNT      CDCL3
EXREF      77.00 ppm
BF          0.12 Hz
RGAIN      60
    
```

single\_pulse

F:\SAA論文\NMR\muchikan OPiv OH epoxy proton-1-1.als

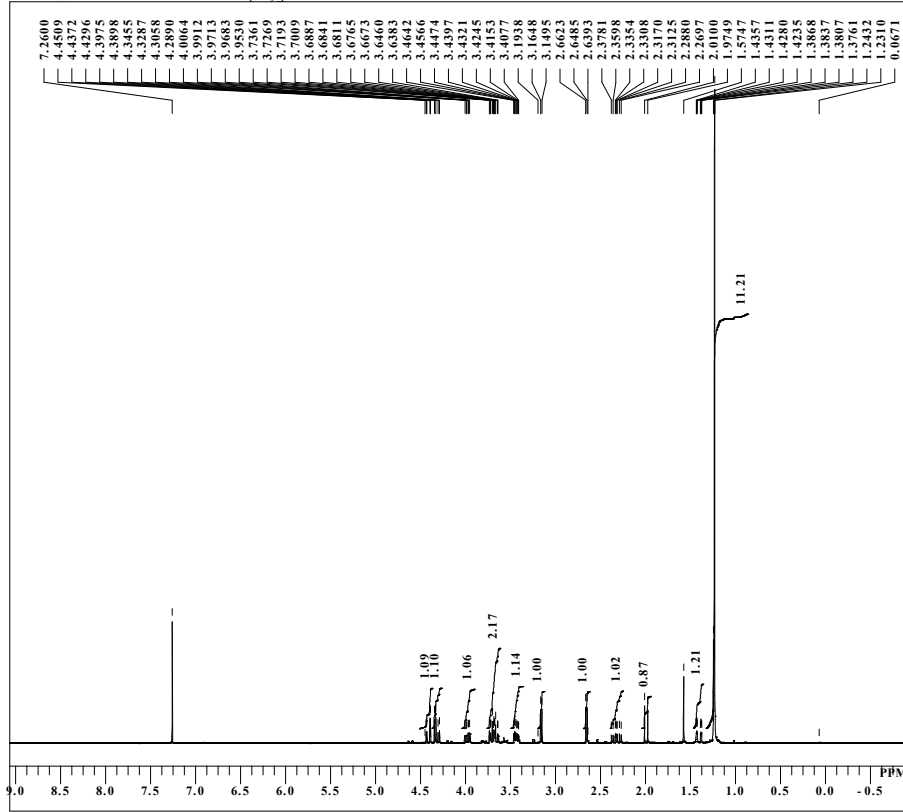

DFILE muchikan OPiv OH epoxy\_proton-1-1.  
COMNT single\_pulse  
DATIM 2019-05-22 12:10:26  
OBNUC 1H  
EXMOD proton.jsp  
OBFRO 300.53 MHz  
OBSET 1.15 KHz  
OBFIN 8.57 Hz  
POINT 13107  
FREQU 6016.85 Hz  
SCANS 13  
ACQTM 2.1784 sec  
PD 1.0000 sec  
PW1 5.50 usec  
IRNUC 1H  
CTEMP 19.7 c  
SLVNT CDCL3  
EXREF 7.26 ppm  
BF 0.12 Hz  
RGAIN 40

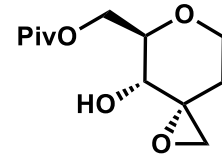

21  
82% in 2 steps

single\_pulse decoupled gated NOE

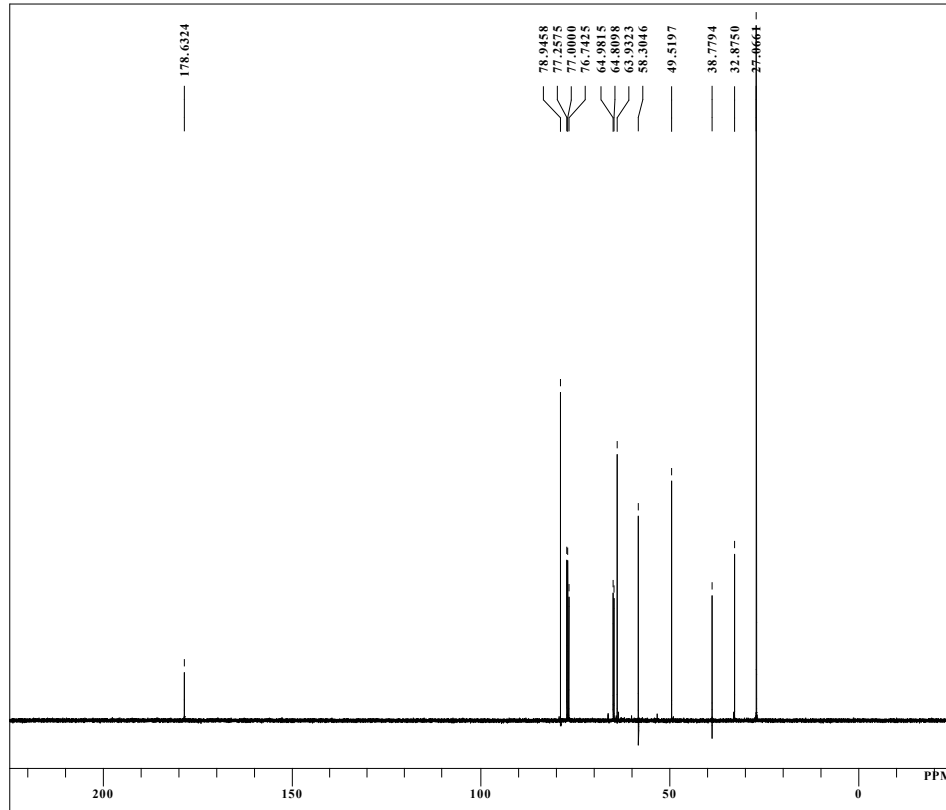

DFILE muchikan OPiv OH epoxy\_Carbon-2-1.  
COMNT single\_pulse decoupled gated NOE  
DATIM 2019-05-22 14:11:07  
OBNUC 13C  
EXMOD carbon.jsp  
OBFRO 125.77 MHz  
OBSET 7.87 KHz  
OBFIN 4.21 Hz  
POINT 26214  
FREQU 31446.54 Hz  
SCANS 122  
ACQTM 0.8336 sec  
PD 2.5000 sec  
PW1 3.27 usec  
IRNUC 13C  
CTEMP 20.2 c  
SLVNT CDCL3  
EXREF 77.00 ppm  
BF 0.12 Hz  
RGAIN 58

single\_pulse

F:\SAA論文\NMR\muchikan OH OTBS epoxy proton-1-1.als

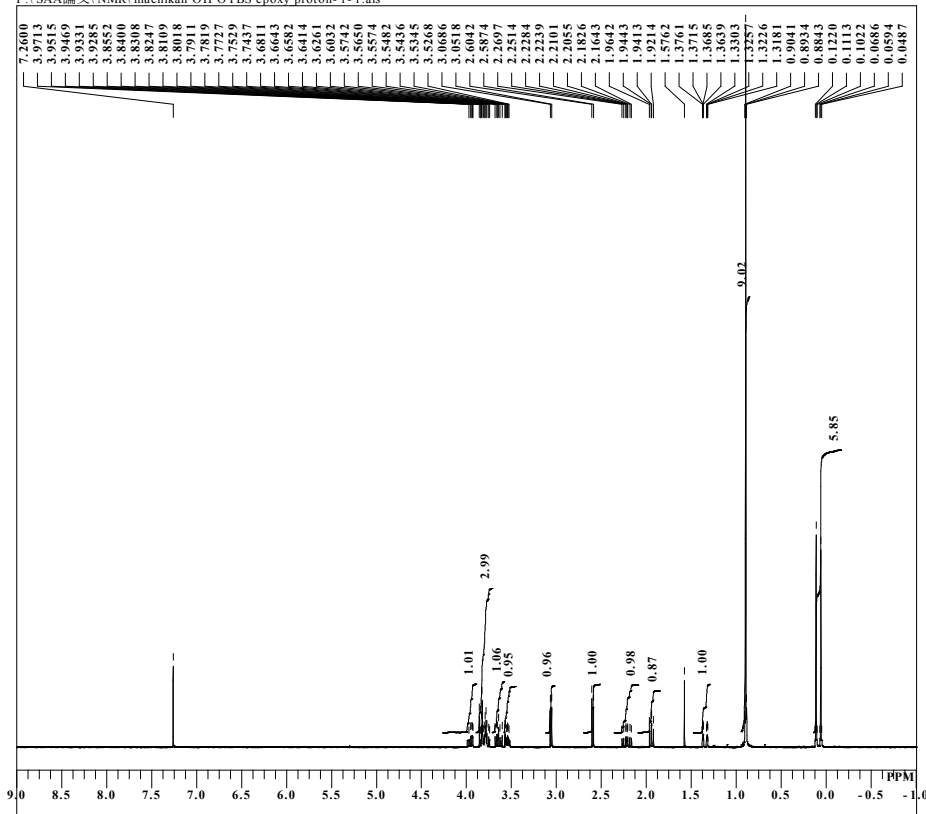

```

DFILE      muchikan OH OTBS epoxy_proton-1-1
COMINT     single_pulse
DATIM      2019-05-23 15:42:23
OBNUC      1H
EXMOD      proton.jsp
OBFREQ     300.53 MHz
OBSET      1.15 KHz
OBFIN      8.57 Hz
POINT      13107
FREQU      6016.85 Hz
SCANS      16
ACQTM      2.1784 sec
PD          1.0000 sec
PW1         5.50 usec
IRNUC      1H
CTEMP      20.1 c
SLVNT      CDCL3
EXREF      7.26 ppm
BF          0.12 Hz
RGAIN      38
    
```

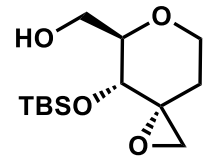

24

59% in 2 steps

single\_pulse decoupled gated NOE

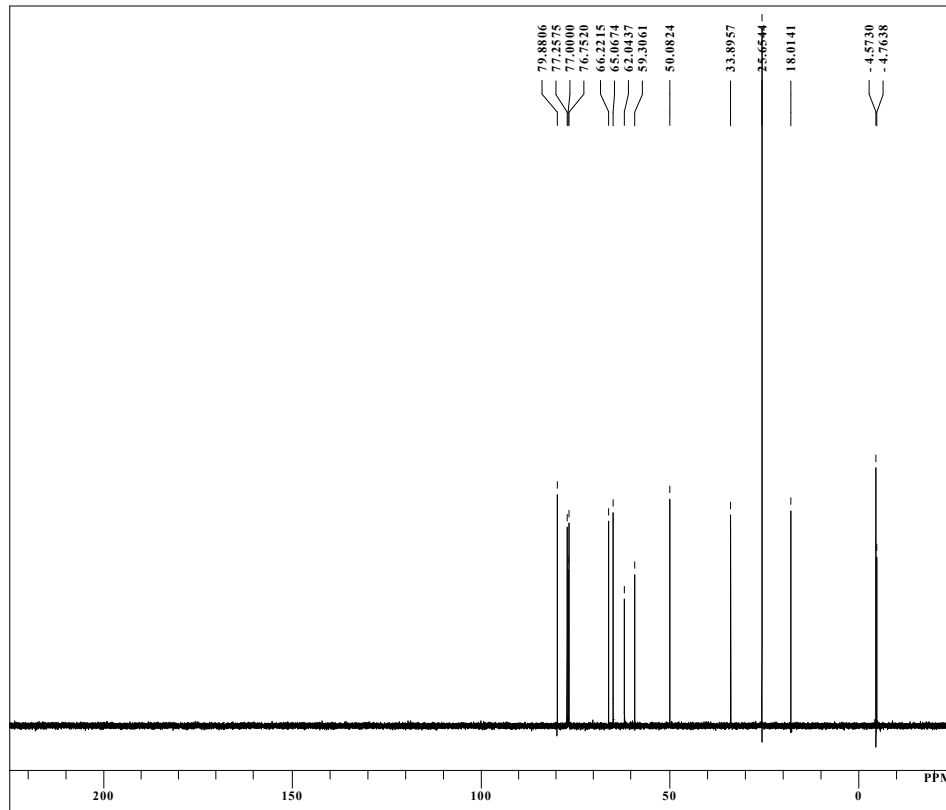

```

DFILE      muchikan OH OTBS epoxy_Carbon-1
COMINT     single_pulse decoupled gated NOE
DATIM      2019-05-23 15:20:28
OBNUC      13C
EXMOD      carbon.jsp
OBFREQ     125.77 MHz
OBSET      7.87 KHz
OBFIN      4.21 Hz
POINT      26214
FREQU      31446.54 Hz
SCANS      76
ACQTM      0.8336 sec
PD          2.0000 sec
PW1         3.27 usec
IRNUC      1H
CTEMP      20.1 c
SLVNT      CDCL3
EXREF      77.00 ppm
BF          0.12 Hz
RGAIN      60
    
```

single\_pulse

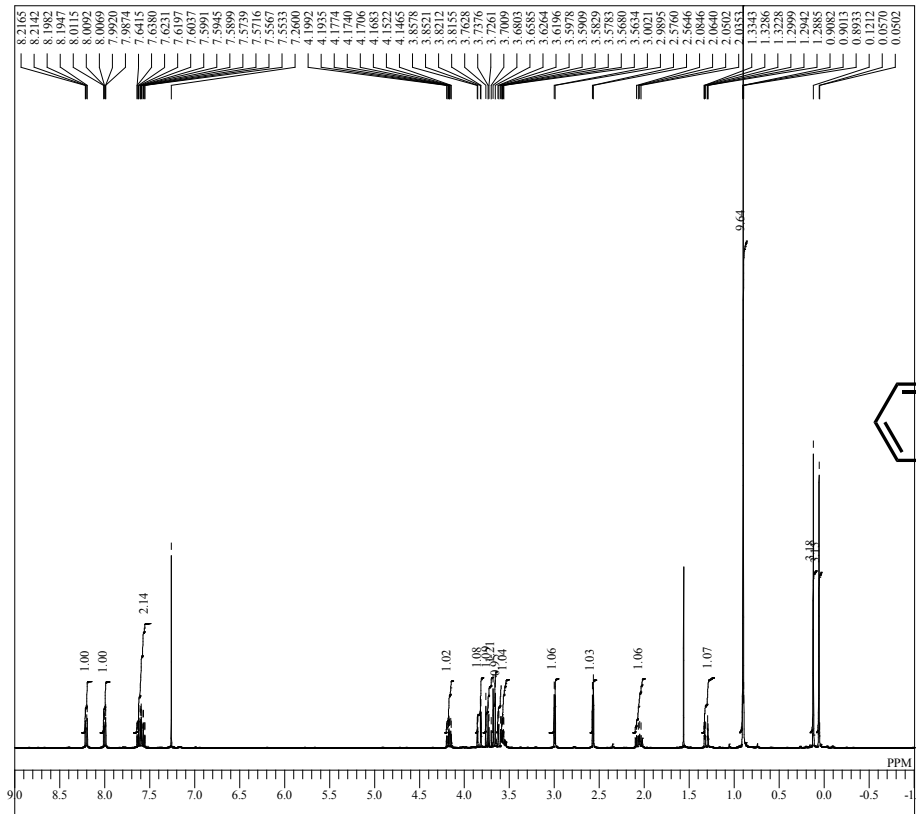

DFILE muchikan SQ2Bt\_proton-1-1.als  
 COMNT single\_pulse  
 DATIM 2019-07-30 15:04:14  
 OBNUC 1H  
 EXMOD proton\_jxp  
 OBFRO 399.78 MHz  
 OBSSET 4.19 KHz  
 OBFIN 7.29 Hz  
 POINT 13107  
 FREQU 6002.40 Hz  
 SCANS 12  
 ACOTM 2.1837 sec  
 PD 2.0000 sec  
 PW1 7.25 usec  
 IRNUC 1H  
 CTEMP 23.1 c  
 SLVNT CDCL3  
 EXREF 7.26 ppm  
 BF 0.12 Hz  
 RGAIN 46

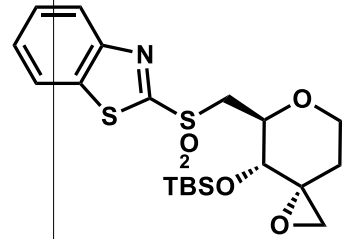

**6**  
**73% in 2 steps**

single\_pulse decoupled gated NOE

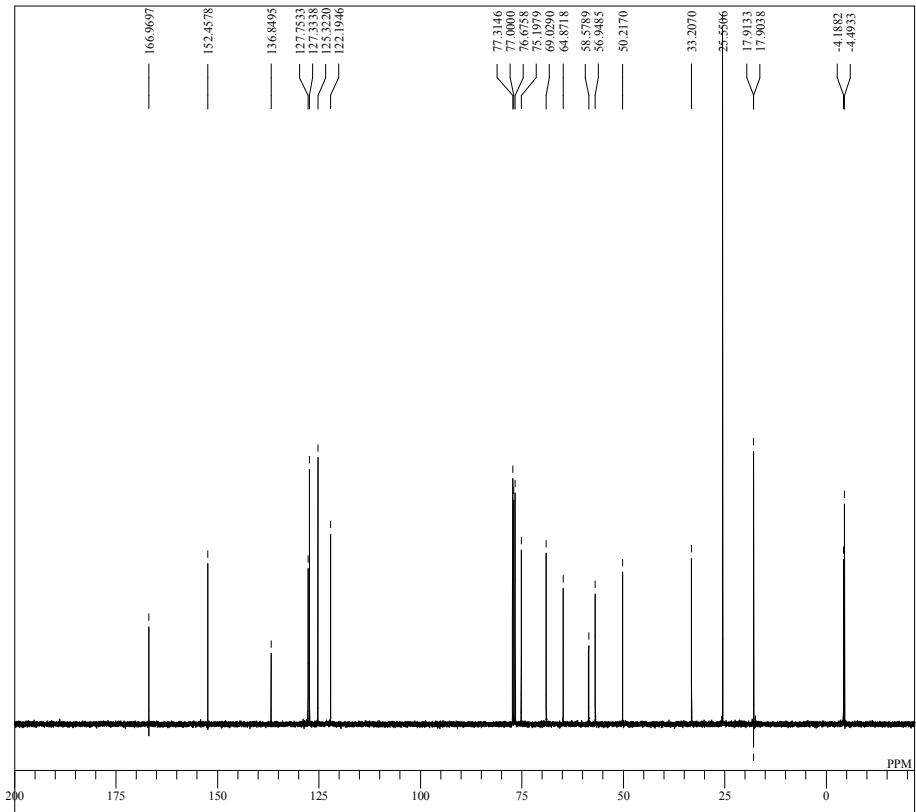

DFILE muchikan SQ2Bt\_carbon-1-1.als  
 COMNT single\_pulse decoupled gated NOE  
 DATIM 2019-07-30 15:25:04  
 OBNUC 13C  
 EXMOD carbon\_jxp  
 OBFRO 100.53 MHz  
 OBSSET 5.35 KHz  
 OBFIN 5.86 Hz  
 POINT 26214  
 FREQU 25125.63 Hz  
 SCANS 372  
 ACOTM 1.0433 sec  
 PD 2.0000 sec  
 PW1 3.17 usec  
 IRNUC 1H  
 CTEMP 23.4 c  
 SLVNT CDCL3  
 EXREF 77.00 ppm  
 BF 0.12 Hz  
 RGAIN 60

single\_pulse

F:\SAA論文\NMR\muchikan normal HCl MeOH proton-1-1.als

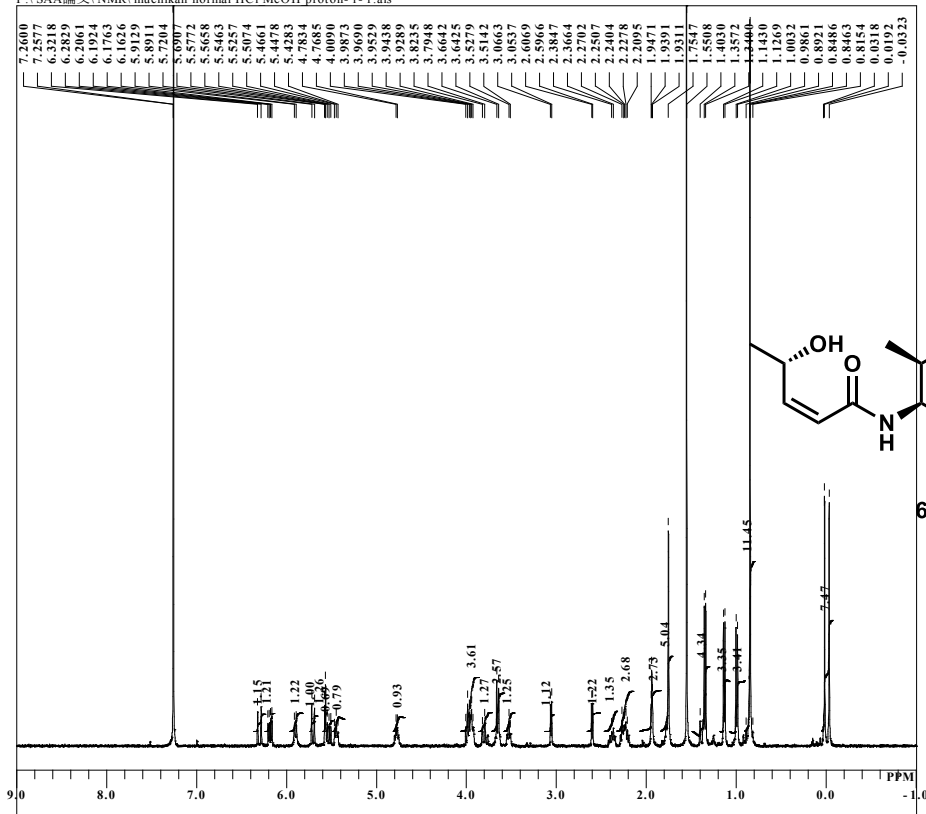

DFILE muchikan normal HCl MeOH proton-1-  
COMNT single\_pulse  
DATIM 2019-06-13 15:26:00  
OBNUC 1H  
EXMOD proton.jsp  
OBFRO 399.78 MHz  
OBSET 4.19 KHz  
OBFIN 7.29 Hz  
POINT 13107  
FREQU 6002.40 Hz  
SCANS 16  
ACQTM 2.1837 sec  
PD 2.0000 sec  
PWI 7.25 usec  
IRNUC 1H  
CTEMP 21.8 c  
SLVNT CDCL3  
EXREF 7.26 ppm  
BF 0.12 Hz  
RGAIN 54

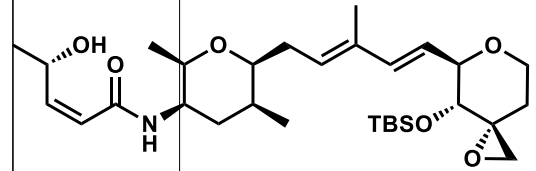

63% in 2 steps

single\_pulse decoupled gated NOE

F:\SAA論文\NMR\muchikantai HCl MeOH Carbon-1-1.als

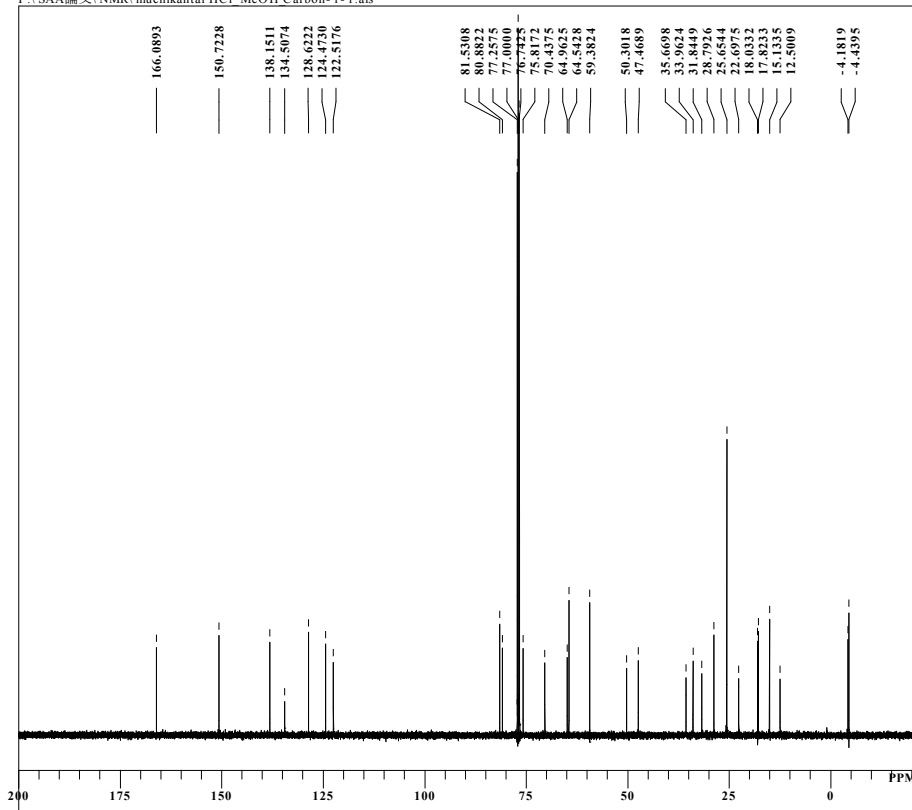

DFILE muchikantai HCl MeOH Carbon-1-1-  
COMNT single\_pulse decoupled gated NOE  
DATIM 2019-06-13 15:49:31  
OBNUC 13C  
EXMOD carbon.jsp  
OBFRO 125.77 MHz  
OBSET 7.87 KHz  
OBFIN 4.21 Hz  
POINT 26214  
FREQU 31446.54 Hz  
SCANS 1052  
ACQTM 0.8336 sec  
PD 2.0000 sec  
PWI 3.27 usec  
IRNUC 1H  
CTEMP 20.9 c  
SLVNT CDCL3  
EXREF 77.00 ppm  
BF 0.12 Hz  
RGAIN 60

single\_pulse

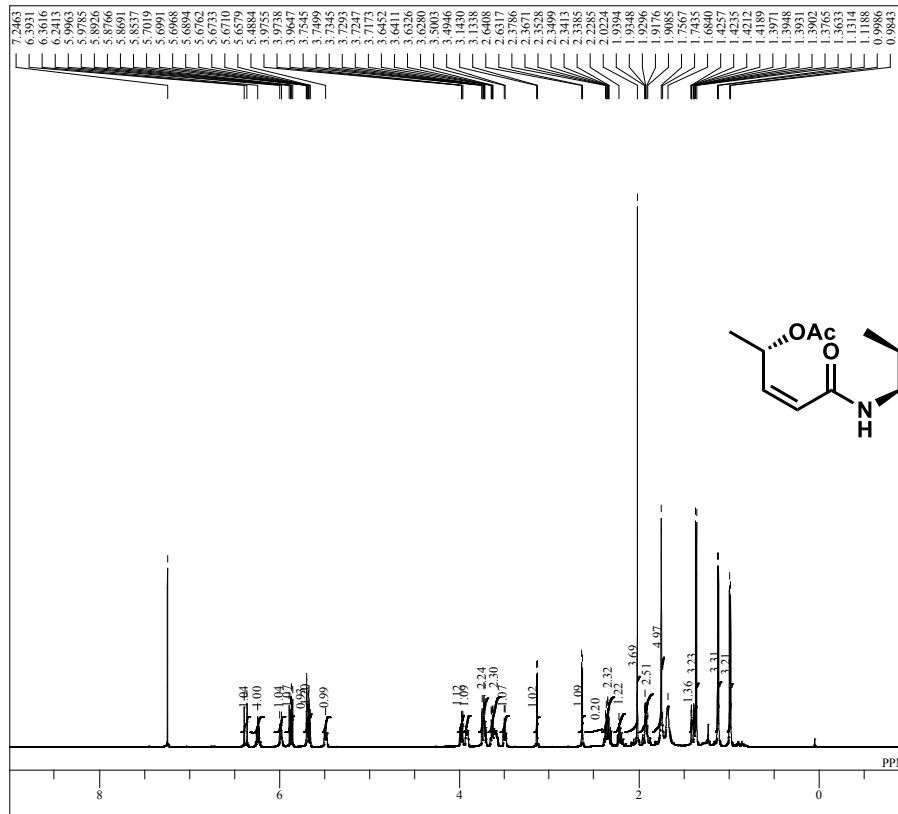

DFILE muchikan OAc yuudoutai\_proton-1-1.als  
COMNT single\_pulse  
DATIM 2019-09-04 21:13:03  
OBNUC 1H  
EXMOD proton\_jxp  
OBFRO 500.16 MHz  
OBSSET 2.41 KHz  
OBFIN 6.01 Hz  
POINT 26214  
FREQU 7507.51 Hz  
SCANS 9  
ACOTM 3.4918 sec  
PD 2.0000 sec  
PW1 6.50 usec  
IRNUC 1H  
CTEMP 22.3 c  
SIVNT CDCL3  
EXREF 7.26 ppm  
BF 0.12 Hz  
RGAIN 44

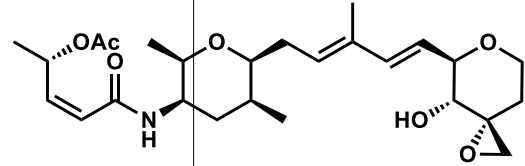

**3**  
72% in 2 steps

single\_pulse decoupled gated NOE

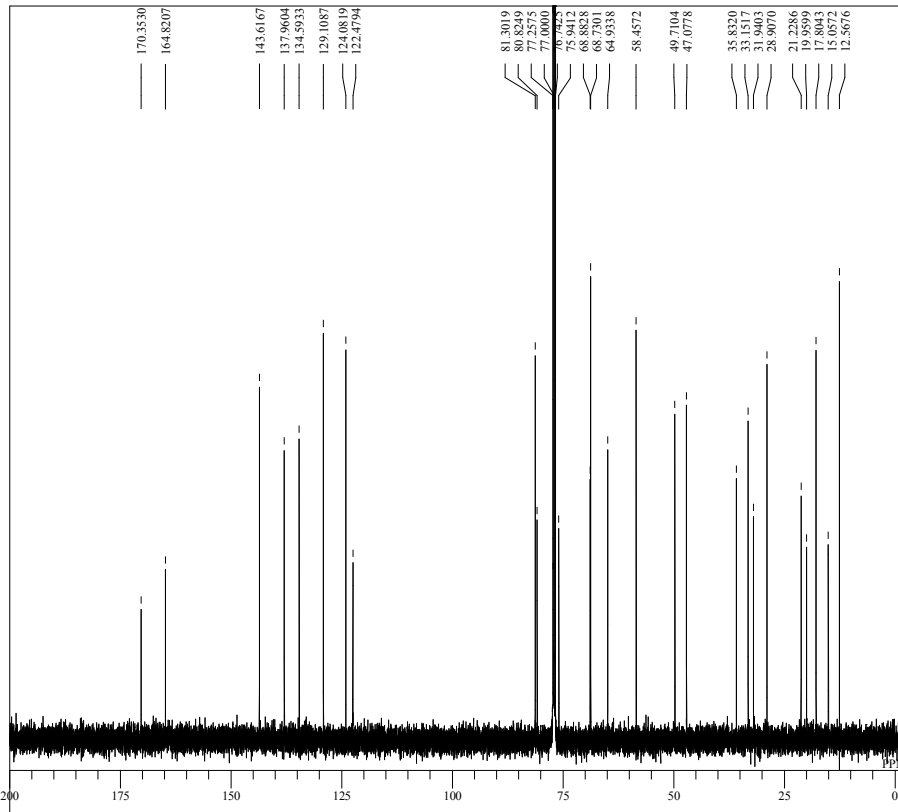

DFILE muchikan OAc yuudoutai\_Carbon-1-1.als  
COMNT single\_pulse decoupled gated NOE  
DATIM 2019-09-04 19:39:35  
OBNUC 13C  
EXMOD carbon\_jxp  
OBFRO 125.77 MHz  
OBSSET 7.87 KHz  
OBFIN 4.21 Hz  
POINT 26214  
FREQU 31446.54 Hz  
SCANS 2398  
ACOTM 0.8336 sec  
PD 1.0000 sec  
PW1 3.27 usec  
IRNUC 13C  
CTEMP 22.6 c  
SIVNT CDCL3  
EXREF 77.00 ppm  
BF 0.12 Hz  
RGAIN 50

single\_pulse

E:\SAA論文\NMR\right muchikan OTBS OTBS keton proton-1-1.als

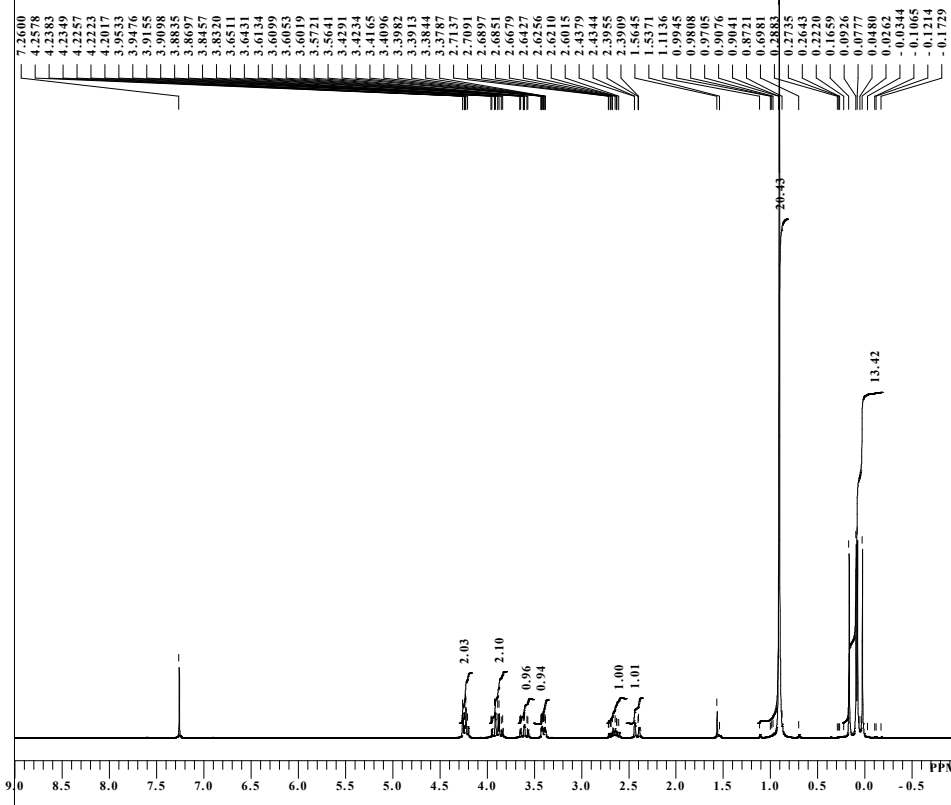

DFILE right muchikan OTBS OTBS keton\_pr  
 COMINT single\_pulse  
 DATIM 2020-02-04 22:00:52  
 OBNUC 1H  
 EXMOD proton.jxp  
 OBFREQ 300.53 MHz  
 OBSSET 1.15 KHz  
 OBFIN 8.57 Hz  
 POINT 13107  
 FREQU 4508.57 Hz  
 SCANS 12  
 ACQTM 2.9072 sec  
 PD 2.0000 sec  
 PWI 5.50 usec  
 IRNUC 1H  
 CTEMP 17.8 c  
 SLVNT CDCL3  
 EXREF 7.26 ppm  
 BF 0.12 Hz  
 RGAIN 40

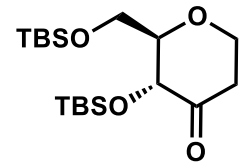

**1**  
 95% in 2 steps

single\_pulse decoupled gated NOE

E:\SAA論文\NMR\right muchikan OTBS oTBS Carbon-1-1.als

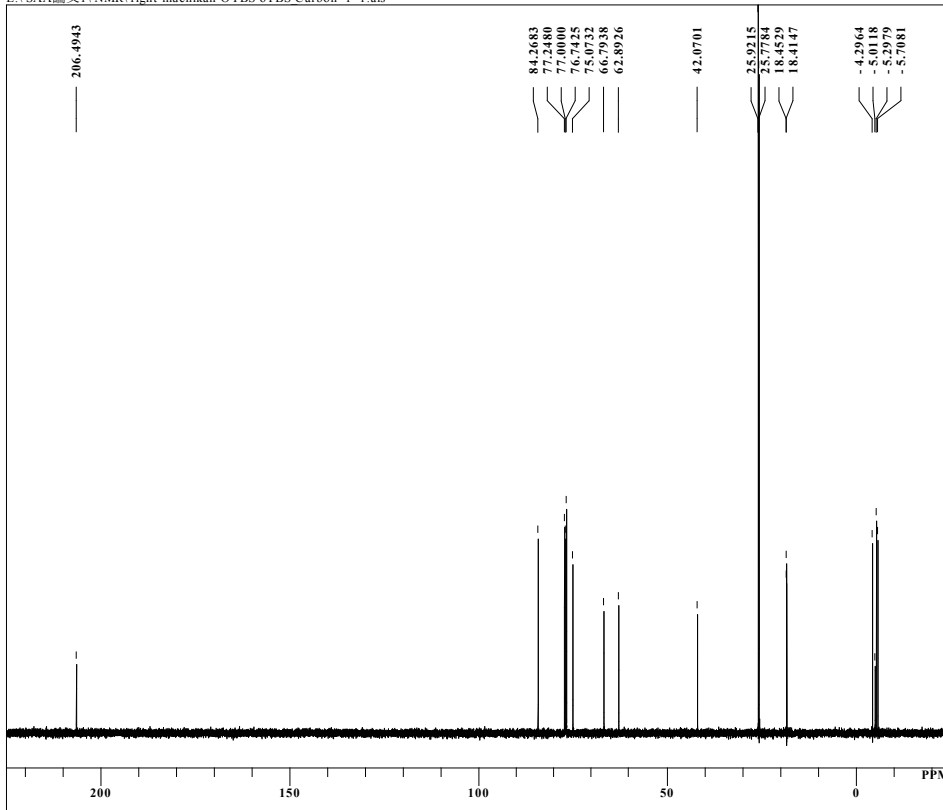

DFILE right muchikan OTBS oTBS Carbon-1  
 COMINT single\_pulse decoupled gated NOE  
 DATIM 2020-02-04 21:53:45  
 OBNUC 13C  
 EXMOD carbon.jxp  
 OBFREQ 125.77 MHz  
 OBSSET 7.87 KHz  
 OBFIN 4.21 Hz  
 POINT 26214  
 FREQU 31446.54 Hz  
 SCANS 62  
 ACQTM 0.8336 sec  
 PD 2.0000 sec  
 PWI 3.27 usec  
 IRNUC 1H  
 CTEMP 20.5 c  
 SLVNT CDCL3  
 EXREF 77.00 ppm  
 BF 0.12 Hz  
 RGAIN 60





single\_pulse

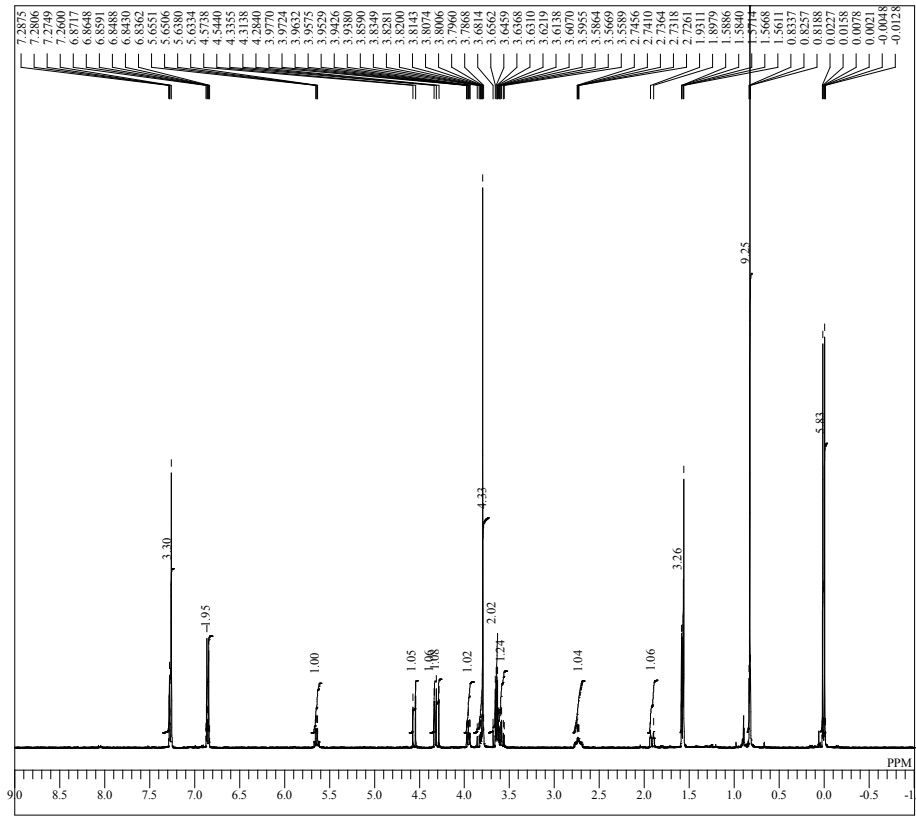

DFILE right\_muchikan\_OTBS\_OPMB\_etylolfrin\_shita\_proton  
 COMNT single\_pulse  
 DATIM 2019-07-27 17:43:37  
 OBNUC 1H  
 EXMOD proton\_jxp  
 OBFRO 399.78 MHz  
 OBSSET 4.19 KHz  
 OBFIN 7.29 Hz  
 POINT 13107  
 FREQU 6002.40 Hz  
 SCANS 8  
 ACQTM 2.1837 sec  
 PD 1.0000 sec  
 PW1 7.25 usec  
 IRNUC 1H  
 CTEMP 22.4 c  
 SLVNT CDCL3  
 EXREF 7.26 ppm  
 BF 0.12 Hz  
 RGAIN 46

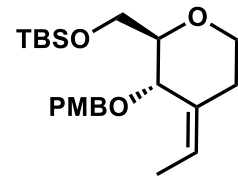

19  
 47%

single\_pulse decoupled gated NOE

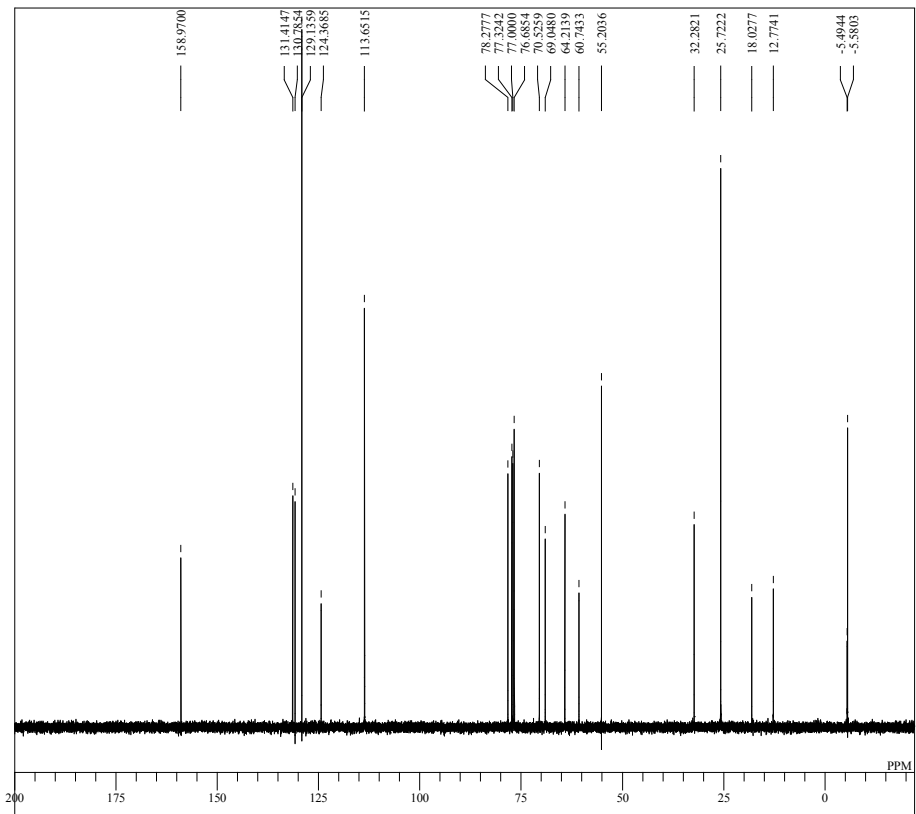

DFILE right\_muchikan\_OPMB\_OTBS\_etylolfrin\_shita\_carbon  
 COMNT single\_pulse decoupled gated NOE  
 DATIM 2019-07-27 18:00:47  
 OBNUC 13C  
 EXMOD carbon\_jxp  
 OBFRO 100.53 MHz  
 OBSSET 5.35 KHz  
 OBFIN 5.86 Hz  
 POINT 26214  
 FREQU 25125.63 Hz  
 SCANS 196  
 ACQTM 1.0433 sec  
 PD 1.0000 sec  
 PW1 3.17 usec  
 IRNUC 1H  
 CTEMP 22.8 c  
 SLVNT CDCL3  
 EXREF 77.00 ppm  
 BF 0.12 Hz  
 RGAIN 60

single\_pulse

F:\SAA論文\NMR\muchikann OPiv OPMB etyl olefin shita proton-1-1.als

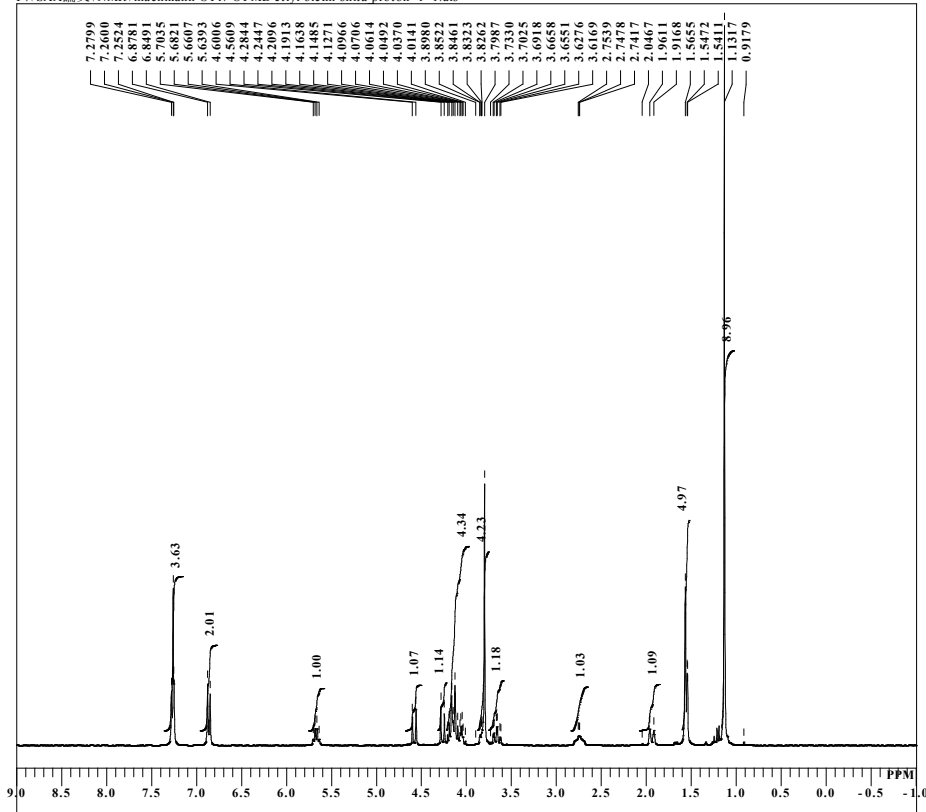

DFILE muchikann OPiv OPMB etyl olefin shit  
 COMNT single\_pulse  
 DATIM 2019-05-29 13:31:09  
 OBNUC 1H  
 EXMOD proton.jsp  
 OBFRO 300.53 MHz  
 OBSET 1.15 KHz  
 OBFIN 8.57 Hz  
 POINT 13107  
 FREQU 6016.85 Hz  
 SCANS 20  
 ACQTM 2.1784 sec  
 PD 1.0000 sec  
 PWI 5.50 usec  
 IRNUC 1H  
 CTEMP 20.4 c  
 SLVNT CDCL3  
 EXREF 7.26 ppm  
 BF 1.20 Hz  
 RGAIN 40

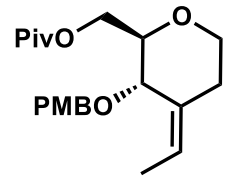

14  
 59% in 2 steps

single\_pulse decoupled gated NOE

F:\SAA論文\NMR\muchikan OPiv OPMB etyl olefin shita Carbon-1-1.als

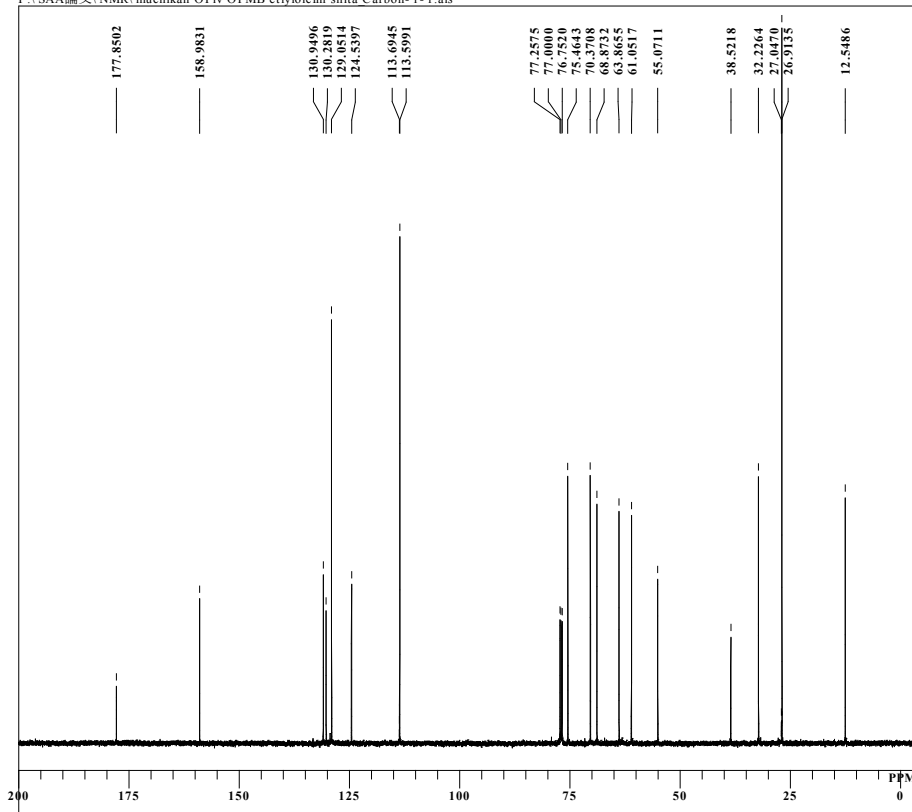

DFILE muchikan OPiv OPMB etyl olefin shita  
 COMNT single\_pulse decoupled gated NOE  
 DATIM 2019-05-29 13:41:32  
 OBNUC 13C  
 EXMOD carbon.jsp  
 OBFRO 125.77 MHz  
 OBSET 7.87 KHz  
 OBFIN 4.21 Hz  
 POINT 26214  
 FREQU 31446.54 Hz  
 SCANS 76  
 ACQTM 0.8336 sec  
 PD 2.0000 sec  
 PWI 3.27 usec  
 IRNUC 1H  
 CTEMP 20.5 c  
 SLVNT CDCL3  
 EXREF 77.00 ppm  
 BF 1.20 Hz  
 RGAIN 58

single\_pulse

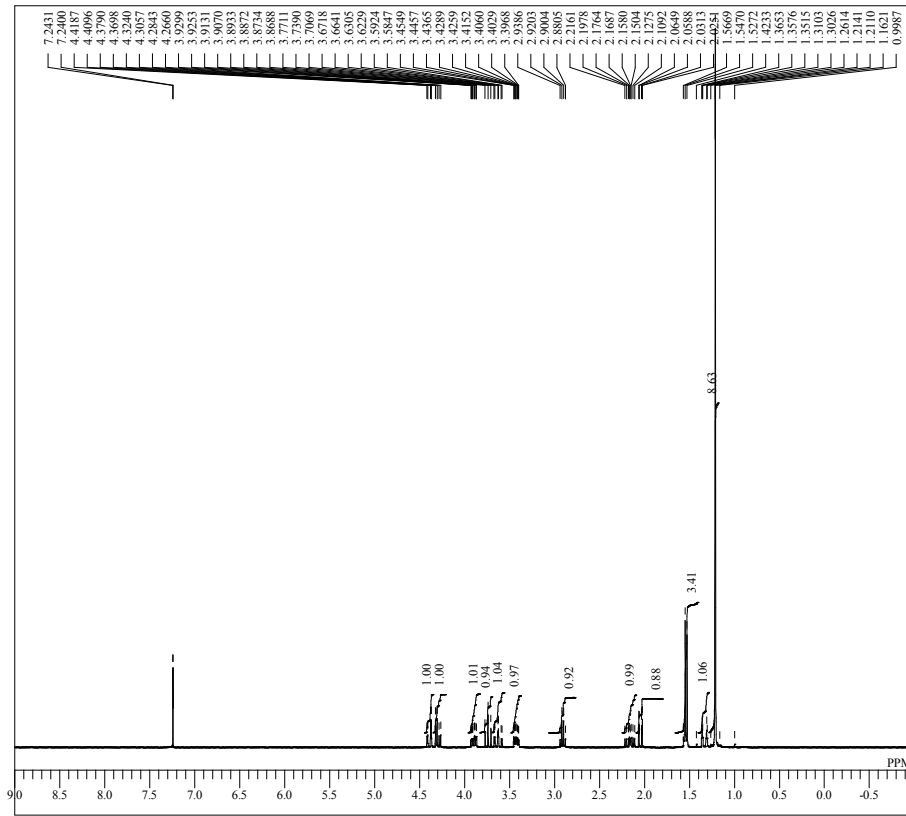

DFILE muchikan OPiv OH ethylelefin shita\_proton-1-1.als  
 COMNT single\_pulse  
 DATIM 2019-05-30 18:21:44  
 OBNUC 1H  
 EXMOD proton.jsp  
 OBFRO 300.53 MHz  
 OBSRT 1.15 KHz  
 OBFIN 8.57 Hz  
 POINT 13107  
 FREQU 6016.85 Hz  
 SCANS 16  
 ACQTM 2.1784 sec  
 PD 1.0000 sec  
 PW1 5.50 usec  
 IRNUC 1H  
 CTEMP 20.5 c  
 SLVNT CDCL3  
 EXREF 7.24 ppm  
 BF 0.12 Hz  
 RGAIN 40

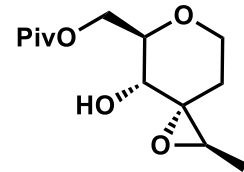

**22**  
 95% in 2 steps

single\_pulse decoupled gated NOE

F:\SAA論文\NMR\ muchikan OPiv OH ethyl epoxy shita Carbon-1-1.als

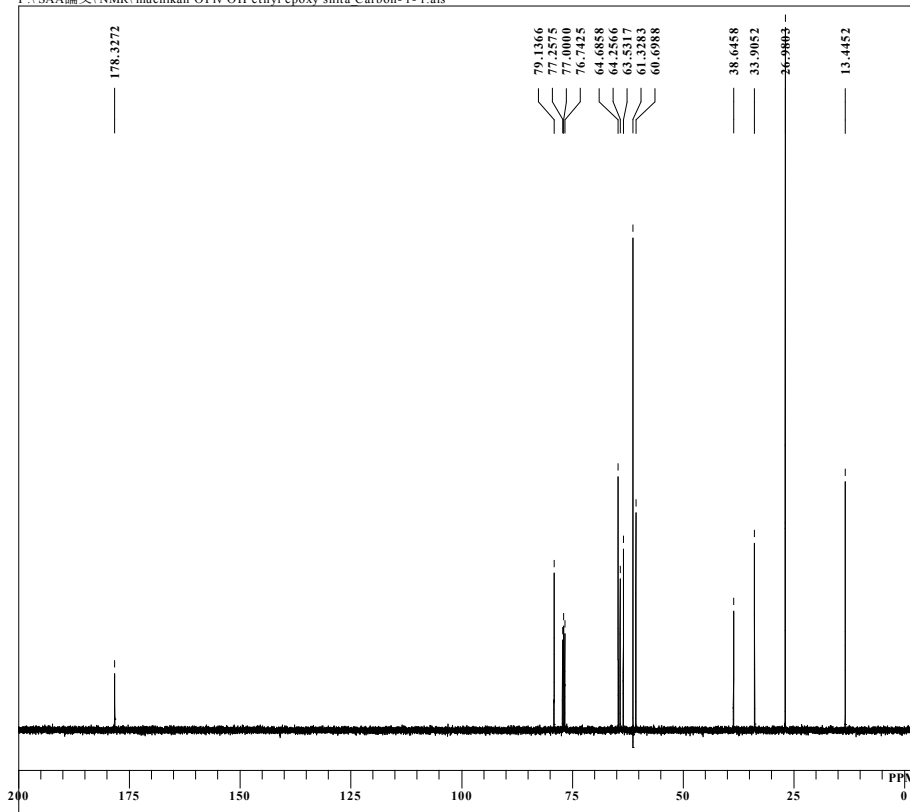

DFILE muchikan OPiv OH ethyl epoxy shita\_C  
 COMNT single\_pulse decoupled gated NOE  
 DATIM 2019-05-30 20:21:51  
 OBNUC 13C  
 EXMOD carbon.jsp  
 OBFRO 125.77 MHz  
 OBSRT 7.87 KHz  
 OBFIN 4.21 Hz  
 POINT 26214  
 FREQU 31446.54 Hz  
 SCANS 43  
 ACQTM 0.8336 sec  
 PD 2.0000 sec  
 PW1 3.27 usec  
 IRNUC 1H  
 CTEMP 20.3 c  
 SLVNT CDCL3  
 EXREF 77.00 ppm  
 BF 0.12 Hz  
 RGAIN 60

single\_pulse

F:\SAA論文\NMR\muchikan OH OTBS ethylepoxy shita proton-1-1.als

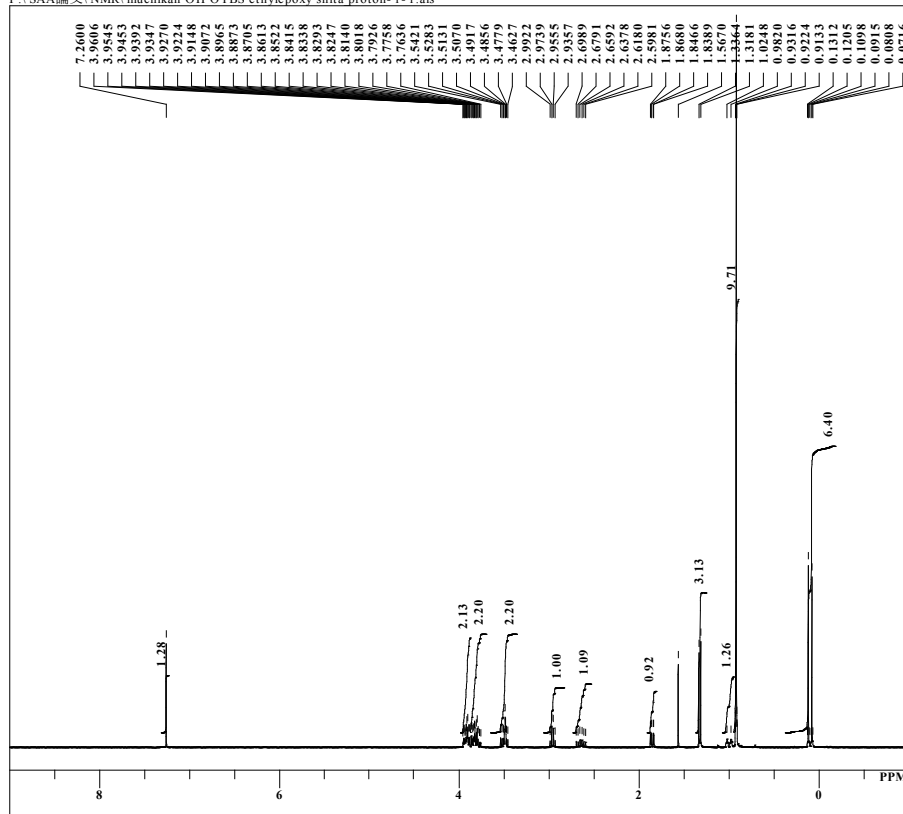

DFILE muchikan OH OTBS ethylepoxy shita\_p  
COMNT single\_pulse  
DATIM 2019-05-31 21:44:56  
OBNUC 1H  
EXMOD proton.jsp  
OBFREQ 300.53 MHz  
OBSET 1.15 KHz  
OBFIN 8.57 Hz  
POINT 13107  
FREQU 6016.85 Hz  
SCANS 13  
ACQTM 2.1784 sec  
PD 1.0000 sec  
PW1 5.50 usec  
IRNUC 1H  
CTEMP 20.6 c  
SLVNT CDCL3  
EXREF 7.26 ppm  
BF 0.12 Hz  
RGAIN 40

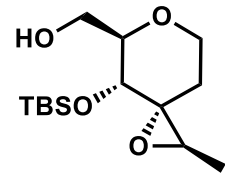

25  
66% in 2 steps

single\_pulse decoupled gated NOE

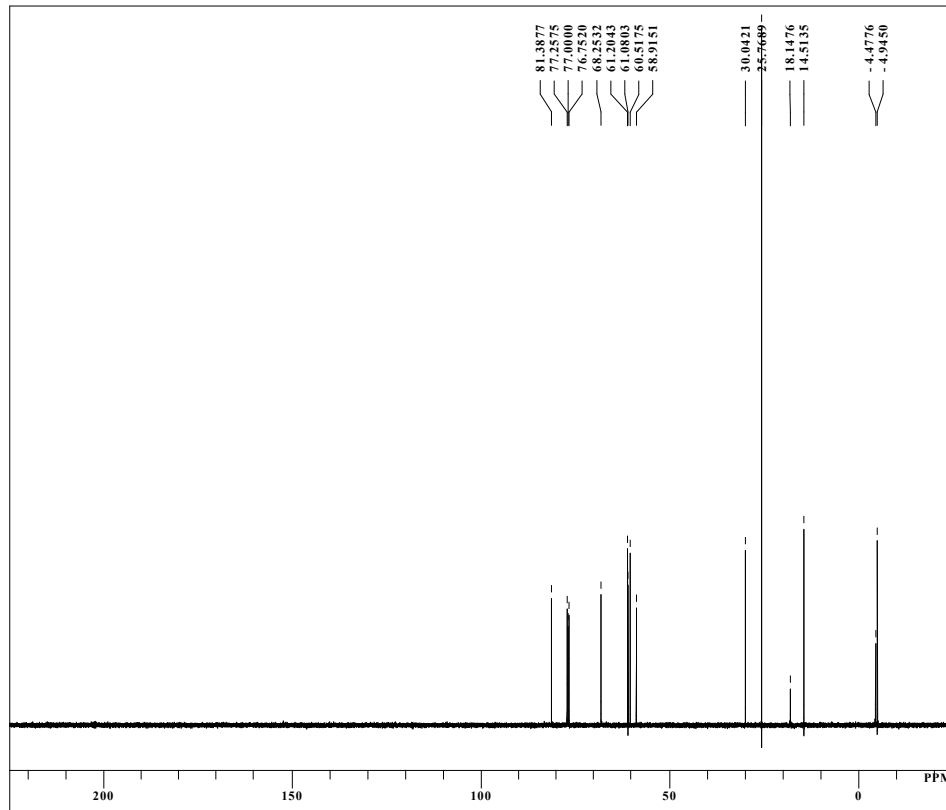

DFILE muchikan OH OTBS ethylepoxy shita  
COMNT single\_pulse decoupled gated NOE  
DATIM 2019-06-05 22:56:55  
OBNUC 13C  
EXMOD carbon.jsp  
OBFREQ 125.77 MHz  
OBSET 7.87 KHz  
OBFIN 4.21 Hz  
POINT 26214  
FREQU 31446.54 Hz  
SCANS 96  
ACQTM 0.8336 sec  
PD 1.0000 sec  
PW1 3.27 usec  
IRNUC 13C  
CTEMP 21.8 c  
SLVNT CDCL3  
EXREF 77.00 ppm  
BF 0.12 Hz  
RGAIN 60

single\_pulse

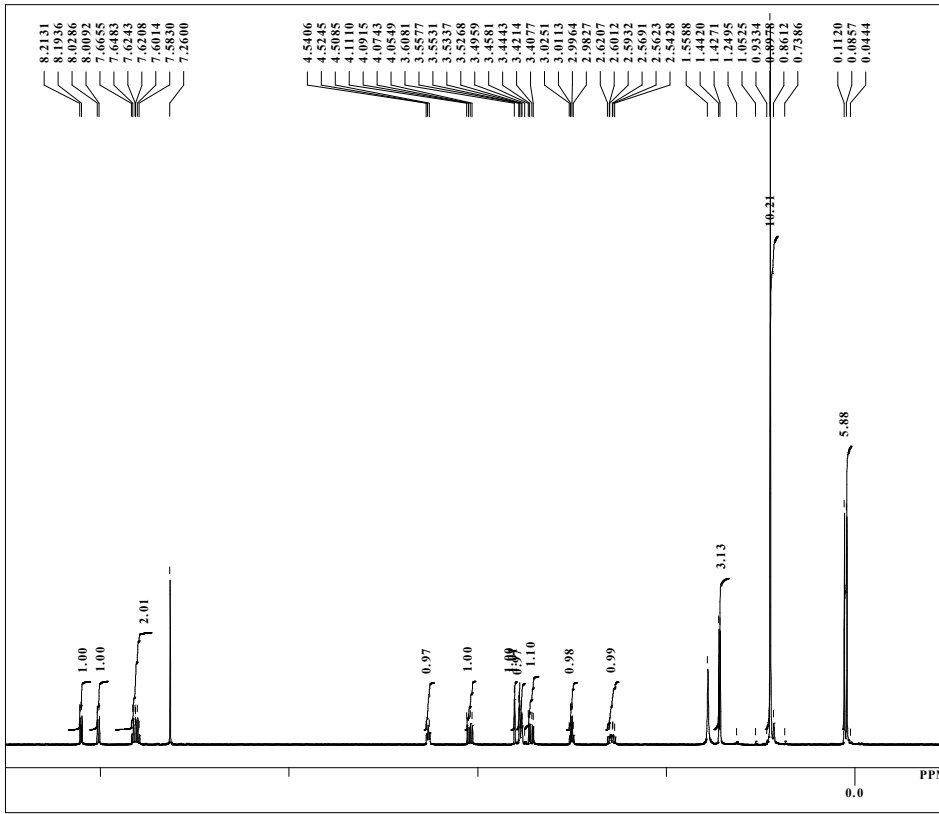

DFILE right\_muchikan\_shita\_SO2Bt\_OTBS\_ep  
 COMINT single\_pulse  
 DATUM 2019-12-30 15:14:53  
 OBNUC 1H  
 EXMOD proton.jxp  
 OBFREQ 399.78 MHz  
 OBSSET 4.19 KHz  
 OBFIN 7.29 Hz  
 POINT 13107  
 FREQU 6002.40 Hz  
 SCANS 10  
 ACQTM 2.1837 sec  
 PD 2.0000 sec  
 PWI 6.65 usec  
 IRNUC 1H  
 CTEMP 20.1 c  
 SLVNT CDCL3  
 EXREF 7.26 ppm  
 BF 0.12 Hz  
 RGAIN 40

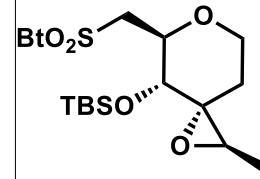

**7**  
**78% in 2 steps**

single\_pulse decoupled gated NOE

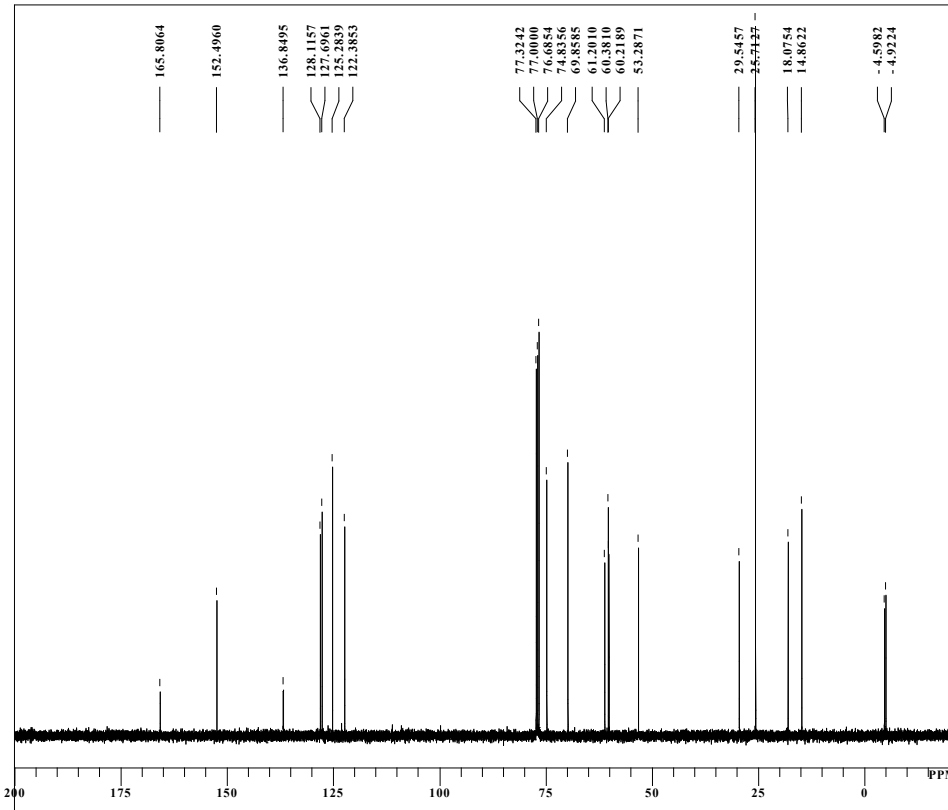

DFILE right\_muchikan\_shita\_SO2Bt\_OTBS\_ep  
 COMINT single\_pulse decoupled gated NOE  
 DATUM 2019-12-30 15:38:19  
 OBNUC 13C  
 EXMOD carbon.jxp  
 OBFREQ 100.53 MHz  
 OBSSET 5.35 KHz  
 OBFIN 5.86 Hz  
 POINT 26214  
 FREQU 25125.63 Hz  
 SCANS 274  
 ACQTM 1.0433 sec  
 PD 2.0000 sec  
 PWI 3.40 usec  
 IRNUC 1H  
 CTEMP 20.5 c  
 SLVNT CDCL3  
 EXREF 77.00 ppm  
 BF 0.12 Hz  
 RGAIN 60

single\_pulse

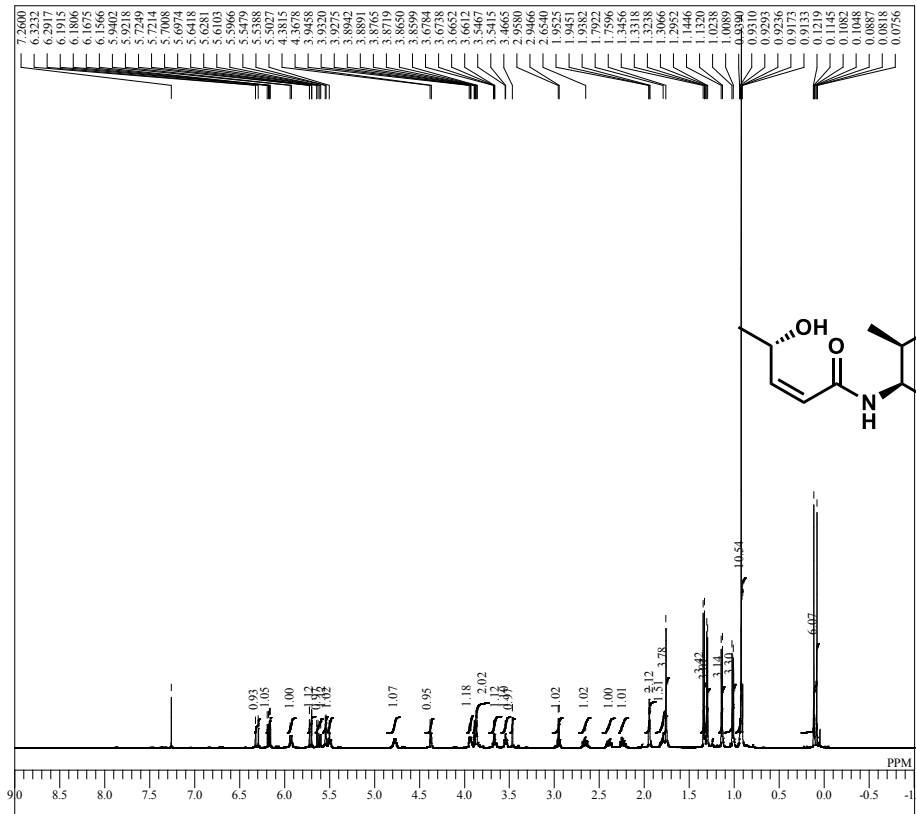

DFILE muchikan etyl shita HCl\_MeOH\_proton-1-1.als  
 COMNT single\_pulse  
 DATIM 2019-09-14 15:29:51  
 OBNUC 1H  
 EXMOD proton.jsp  
 OBFRO 500.16 MHz  
 OBSET 2.41 KHz  
 OBFIN 6.01 Hz  
 POINT 26214  
 FREQU 7507.51 Hz  
 SCANS 9  
 ACQTM 3.4918 sec  
 PD 10.0000 sec  
 PW1 6.50 usec  
 IRNUC 1H  
 CTEMP 23.3 c  
 SLVNT CDCL3  
 EXREF 7.26 ppm  
 BF 0.12 Hz  
 RGAIN 34

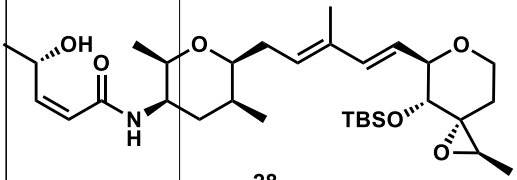

**28**  
39% in 3 steps

single\_pulse decoupled gated NOE

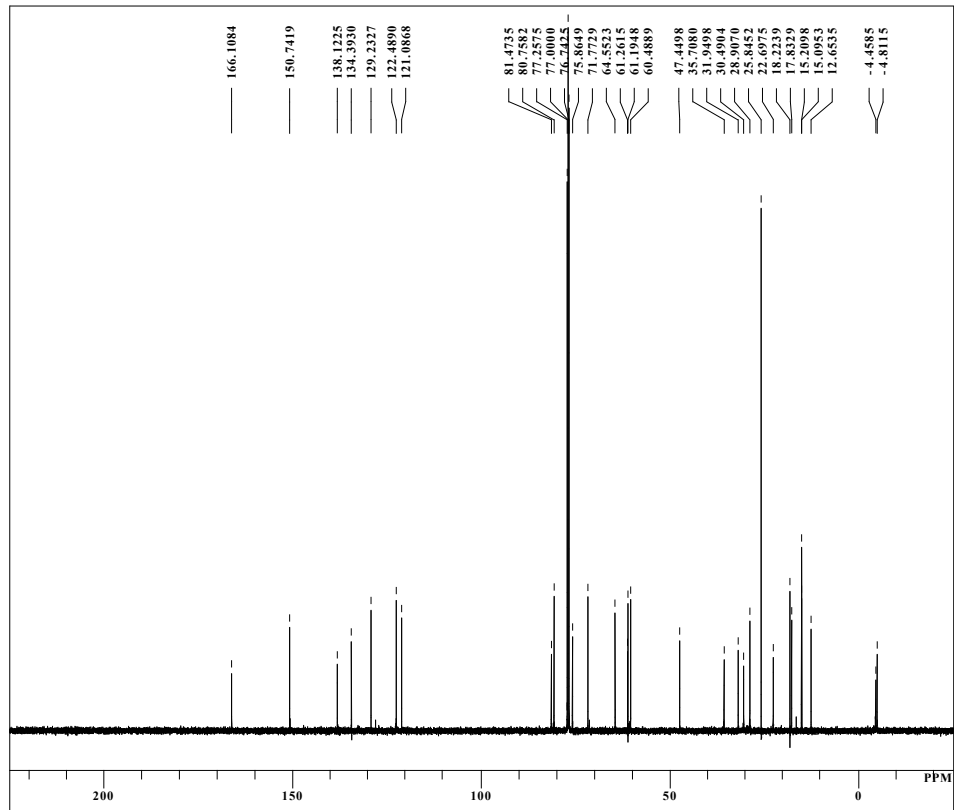

DFILE muchikan etyl shita HCl\_MeOH\_Carbi  
 COMNT single\_pulse decoupled gated NOE  
 DATIM 2019-09-14 15:39:29  
 OBNUC 13C  
 EXMOD carbon.jsp  
 OBFRO 125.77 MHz  
 OBSET 7.87 KHz  
 OBFIN 4.21 Hz  
 POINT 26214  
 FREQU 31446.54 Hz  
 SCANS 1024  
 ACQTM 0.8336 sec  
 PD 2.0000 sec  
 PW1 3.27 usec  
 IRNUC 1H  
 CTEMP 23.6 c  
 SLVNT CDCL3  
 EXREF 77.00 ppm  
 BF 0.12 Hz  
 RGAIN 60

single\_pulse

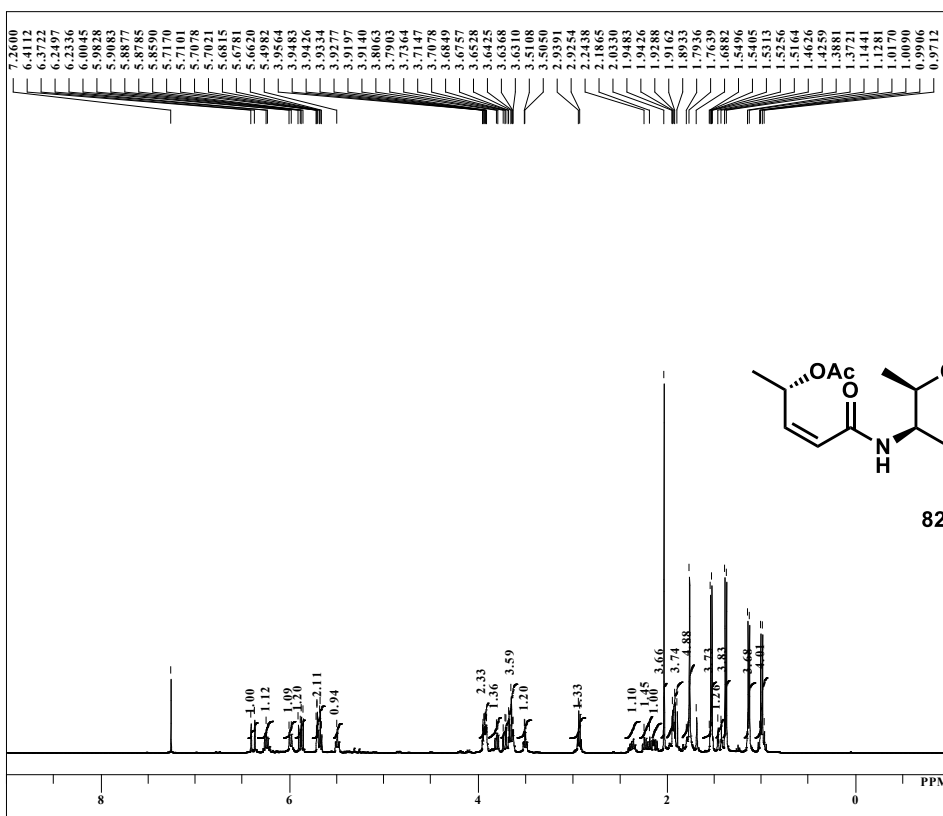

DFILE muchikan-yuudoutai shita proton-1-1  
 COMINT single\_pulse  
 DATIM 2019-12-30 21:05:03  
 OBNUC 1H  
 EXMOD proton.jxp  
 OBFREQ 399.78 MHz  
 OBSSET 4.19 KHz  
 OBFIN 7.29 Hz  
 POINT 13107  
 FREQU 6002.40 Hz  
 SCANS 13  
 ACQTM 2.1837 sec  
 PD 2.0000 sec  
 PWI 6.65 usec  
 IRNUC 1H  
 CTEMP 19.9 c  
 SLVNT CDCL3  
 EXREF 7.26 ppm  
 BF 0.12 Hz  
 RGAIN 34

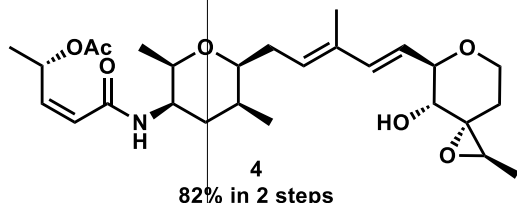

single\_pulse decoupled gated NOE

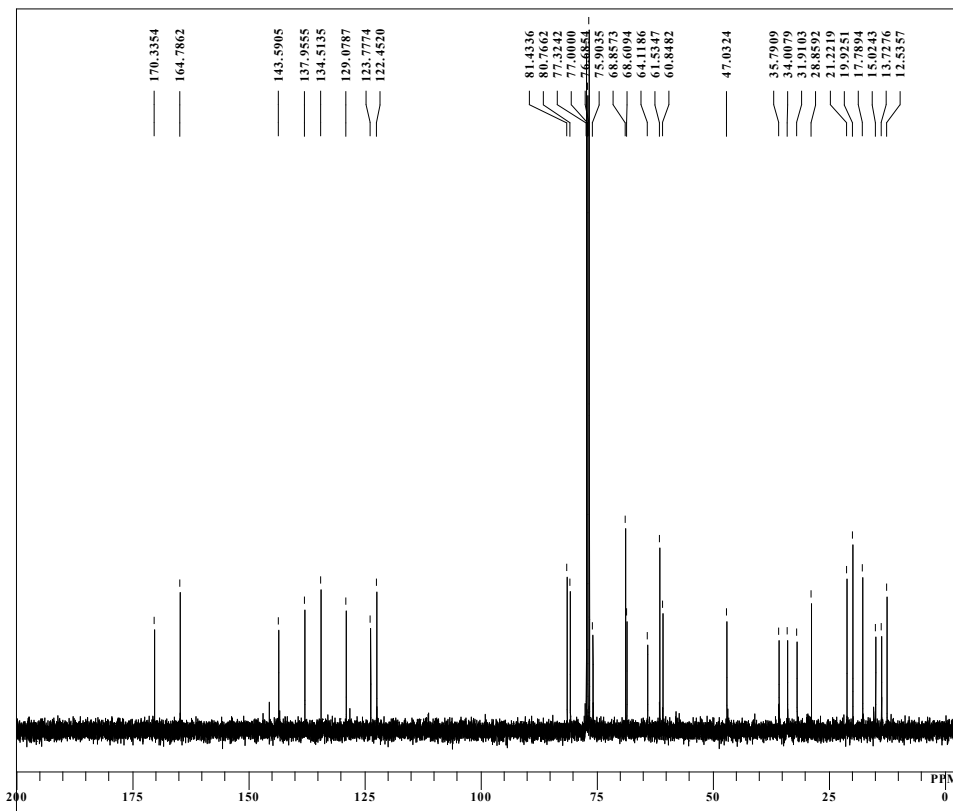

DFILE muchikan-yuudoutai shita carbon-1-1  
 COMINT single\_pulse decoupled gated NOE  
 DATIM 2019-12-30 21:38:60  
 OBNUC 13C  
 EXMOD carbon.jxp  
 OBFREQ 100.53 MHz  
 OBSSET 5.35 KHz  
 OBFIN 5.86 Hz  
 POINT 26214  
 FREQU 25125.63 Hz  
 SCANS 294  
 ACQTM 1.0433 sec  
 PD 2.0000 sec  
 PWI 3.40 usec  
 IRNUC 1H  
 CTEMP 20.4 c  
 SLVNT CDCL3  
 EXREF 77.00 ppm  
 BF 0.12 Hz  
 RGAIN 60





single pulse

F:\SAA論文\NMR\muchikan OPiv OPMB ethylefin ue proton-1-1.als

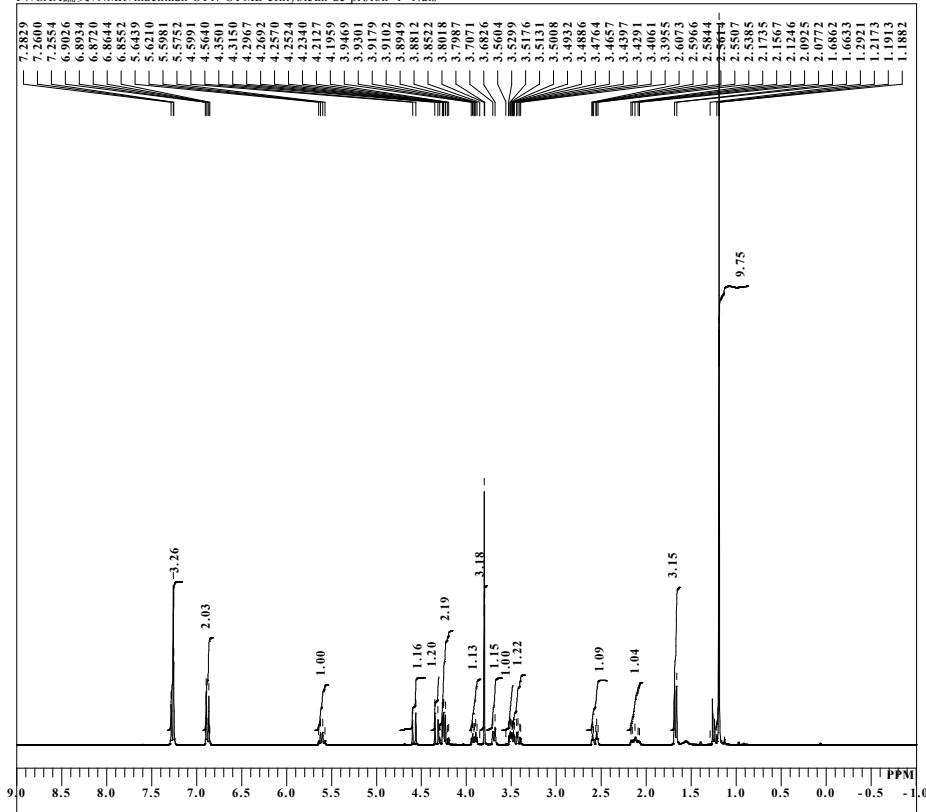

DFILE muchikan OPiv OPMB ethylefin ue\_p  
 COMINT single pulse  
 DATIM 2019-05-29 21:53:58  
 OBNUC 1H  
 EXMOD proton.jsp  
 OBFRO 300.53 MHz  
 OBSSE 1.15 KHz  
 OBFIN 8.57 Hz  
 POINT 13107  
 FREQU 6016.85 Hz  
 SCANS 16  
 ACQTM 2.1784 sec  
 PD 1.0000 sec  
 PWI 5.50 usec  
 BRNUC 1H  
 CTEMP 20.0 c  
 SLVNT CDCL3  
 EXREF 7.26 ppm  
 BF 0.12 Hz  
 RGAIN 38

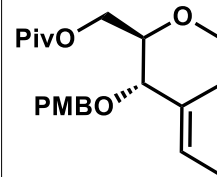

15  
 74% in 2 steps

single pulse decoupled gated NOE

F:\SAA論文\NMR\muchikan OPiv OPMB ethyl-olefin ue carbon-1-1.als

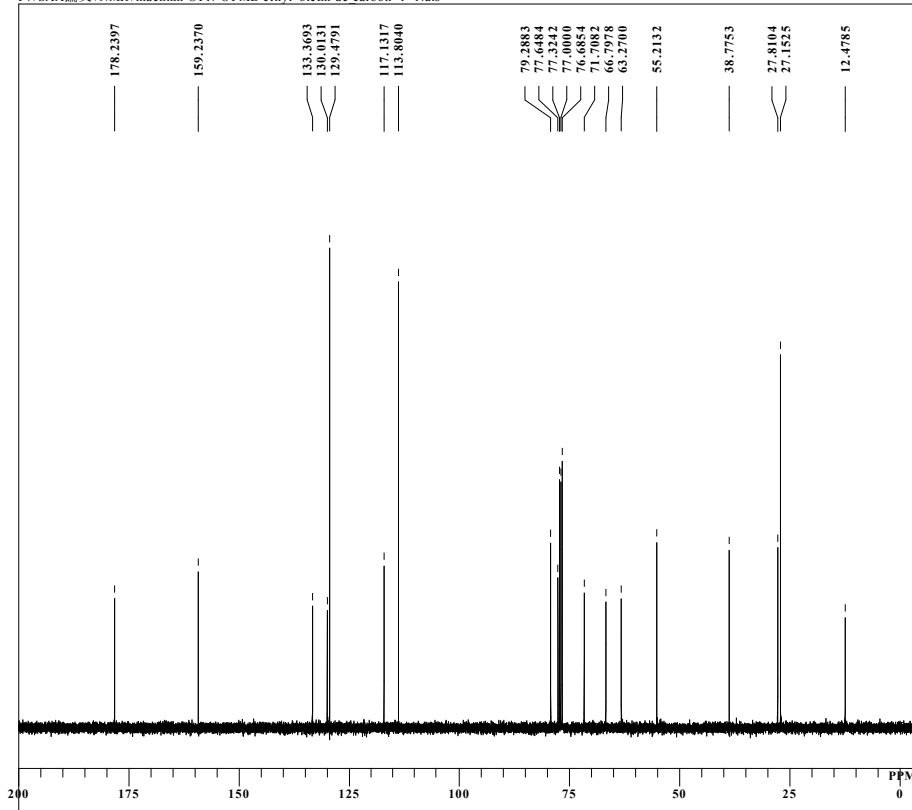

DFILE muchikan OPiv OPMB ethyl-olefin ue\_c  
 COMINT single pulse decoupled gated NOE  
 DATIM 2019-06-10 22:52:42  
 OBNUC 13C  
 EXMOD carbon.jsp  
 OBFRO 100.53 MHz  
 OBSSE 5.35 KHz  
 OBFIN 5.86 Hz  
 POINT 26214  
 FREQU 25125.63 Hz  
 SCANS 85  
 ACQTM 1.0433 sec  
 PD 2.0000 sec  
 PWI 3.17 usec  
 BRNUC 1H  
 CTEMP 21.7 c  
 SLVNT CDCL3  
 EXREF 77.00 ppm  
 BF 0.12 Hz  
 RGAIN 60

single\_pulse

F:\SAA論文\NMR\muchikan OPiv OH ethylepoxy ue proton-1-1.als

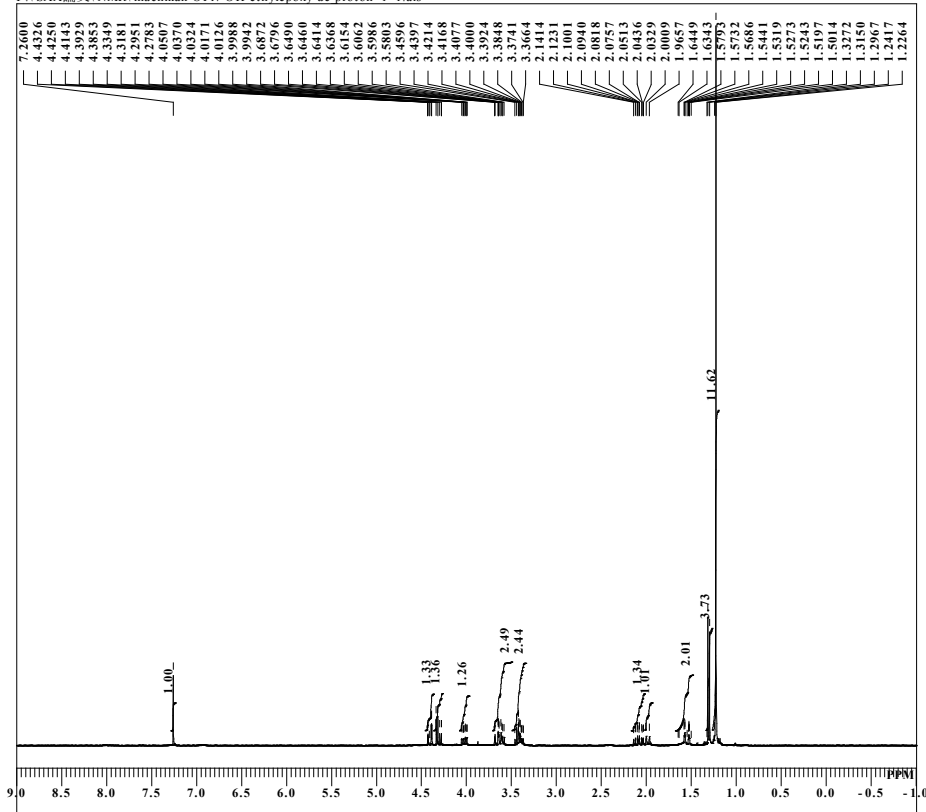

DFILE muchikan OPiv OH ethylepoxy ue\_prot  
COMNT single\_pulse  
DATIM 2019-05-31 20:04:53  
OBNUC 1H  
EXMOD proton.jsp  
OBFRQ 300.53 MHz  
OBSET 1.15 KHz  
OBFIN 8.57 Hz  
POINT 13107  
FREQU 6016.85 Hz  
SCANS 16  
ACQTM 2.1784 sec  
PD 1.0000 sec  
PW1 5.50 usec  
IRNUC 1H  
CTEMP 20.6 c  
SLVNT CDCL3  
EXREF 7.26 ppm  
BF 0.12 Hz  
RGAIN 38

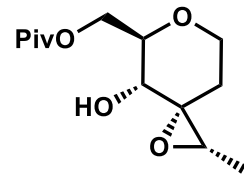

23  
82% in 2 steps

single\_pulse decoupled gated NOE

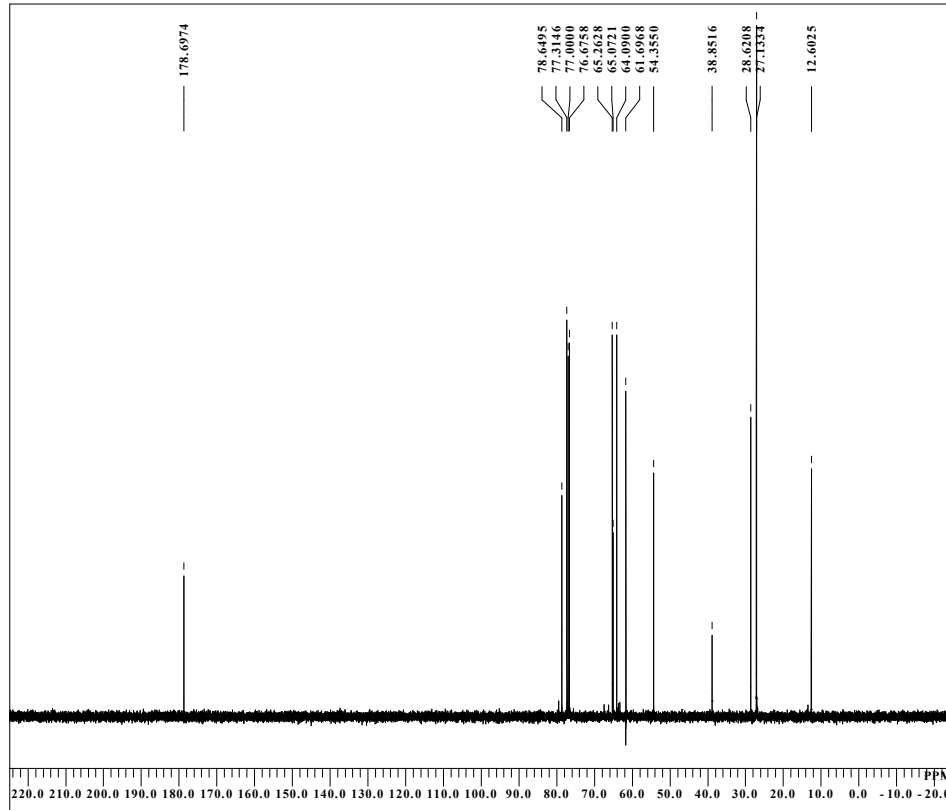

DFILE muchikan OPiv OH etyl epoxy ue\_cai  
COMNT single\_pulse decoupled gated NOE  
DATIM 2019-05-31 20:36:58  
OBNUC 13C  
EXMOD carbon.jsp  
OBFRQ 100.53 MHz  
OBSET 5.35 KHz  
OBFIN 5.86 Hz  
POINT 26214  
FREQU 25125.63 Hz  
SCANS 224  
ACQTM 1.0433 sec  
PD 2.0000 sec  
PW1 3.17 usec  
IRNUC 13C  
CTEMP 21.6 c  
SLVNT CDCL3  
EXREF 77.00 ppm  
BF 0.12 Hz  
RGAIN 60

single\_pulse

F:\SAA論文\NMR\muchikan OH OTBS ethyl epoxy ue proton-1-1.als

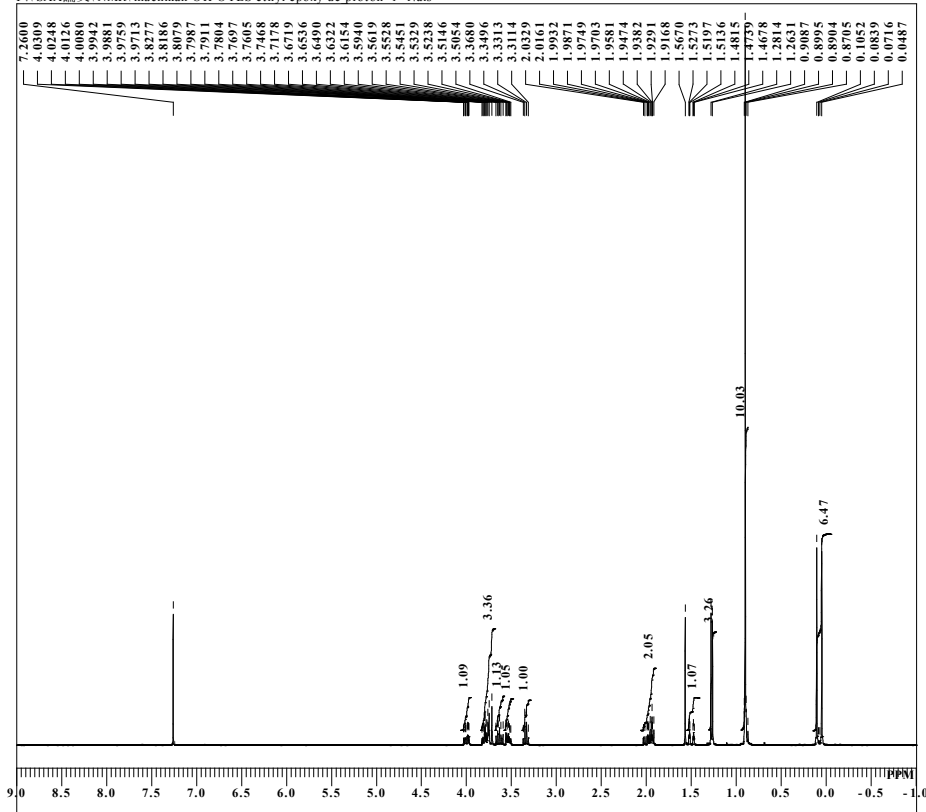

DFILE muchikan OH OTBS ethyl epoxy ue\_pr  
 COMNT single\_pulse  
 DATIM 2019-06-04 22:34:35  
 OBNUC 1H  
 EXMOD proton.jsp  
 OBFRO 300.53 MHz  
 OBSET 1.15 KHz  
 OBFIN 8.57 Hz  
 POINT 13107  
 FREQU 6016.85 Hz  
 SCANS 11  
 ACQTM 2.1784 sec  
 PD 1.0000 sec  
 PW1 5.50 usec  
 IRNUC 1H  
 CTEMP 21.1 c  
 SLVNT CDCL3  
 EXREF 7.26 ppm  
 BF 0.12 Hz  
 RGAIN 40

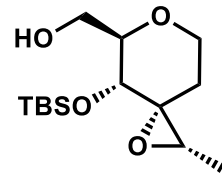

**26**  
 64% in 2 steps

single\_pulse decoupled gated NOE

F:\SAA論文\NMR\muchikan OH OTBS ethylepoxy ue carbon-1-1.als

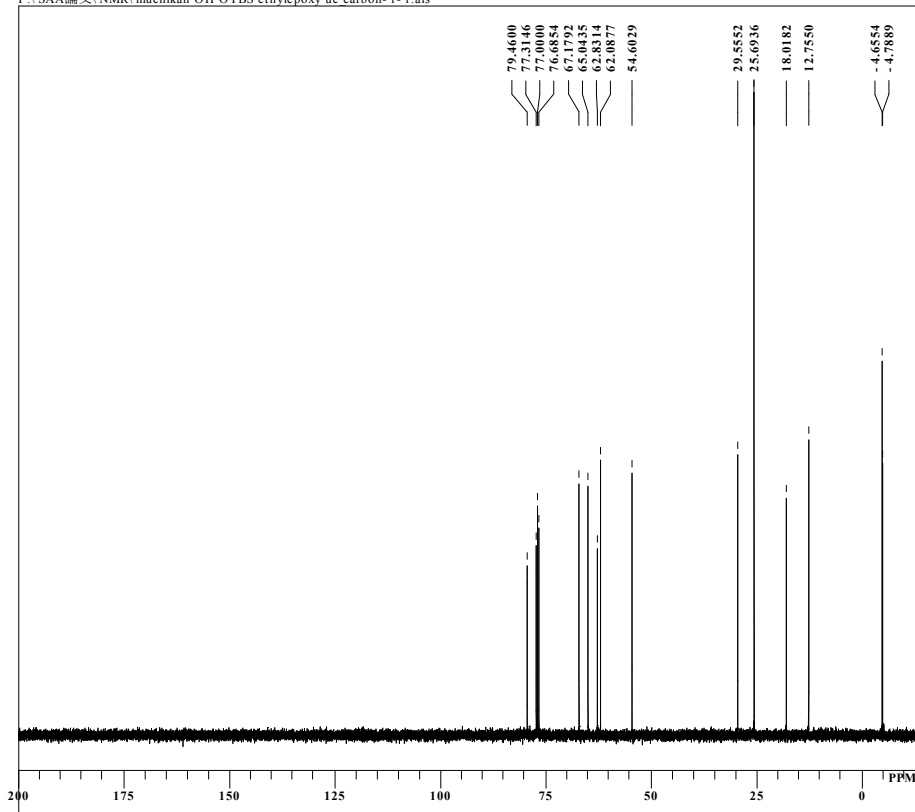

DFILE muchikan OH OTBS ethylepoxy ue\_car  
 COMNT single\_pulse decoupled gated NOE  
 DATIM 2019-06-04 23:07:05  
 OBNUC 13C  
 EXMOD carbon.jsp  
 OBFRO 100.53 MHz  
 OBSET 5.35 KHz  
 OBFIN 5.86 Hz  
 POINT 26214  
 FREQU 25125.63 Hz  
 SCANS 59  
 ACQTM 1.0433 sec  
 PD 2.0000 sec  
 PW1 3.17 usec  
 IRNUC 1H  
 CTEMP 22.0 c  
 SLVNT CDCL3  
 EXREF 77.00 ppm  
 BF 0.12 Hz  
 RGAIN 60

single\_pulse

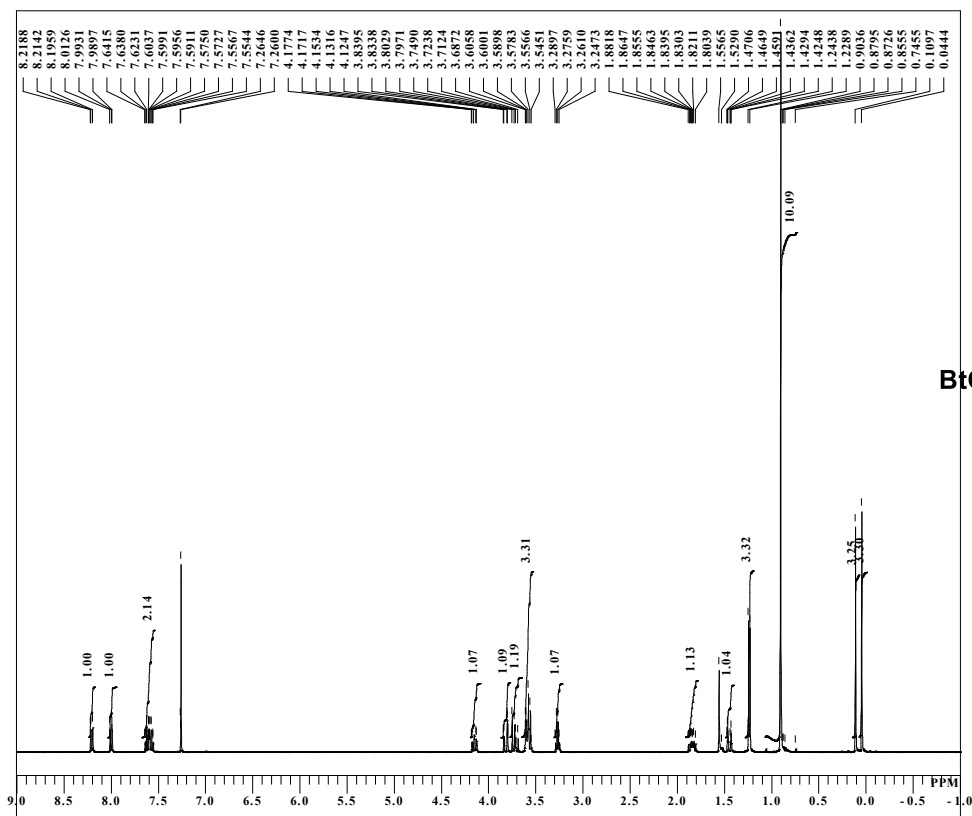

DFILE right\_muchikan\_ue\_So2Bt-OTBS\_epox  
COMINT single\_pulse  
DATIM 2019-12-05 23:13:40  
OBNUC 1H  
EXMOD proton.jxp  
OBFREQ 399.78 MHz  
OBSSET 4.19 KHz  
OBFIN 7.29 Hz  
POINT 13107  
FREQU 6002.40 Hz  
SCANS 7  
ACQTM 2.1837 sec  
PD 2.0000 sec  
PWI 6.65 usec  
IRNUC 1H  
CTEMP 20.6 c  
SLVNT CDCL3  
EXREF 7.26 ppm  
BF 0.12 Hz  
RGAIN 40

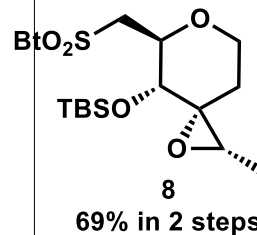

single\_pulse decoupled gated NOE

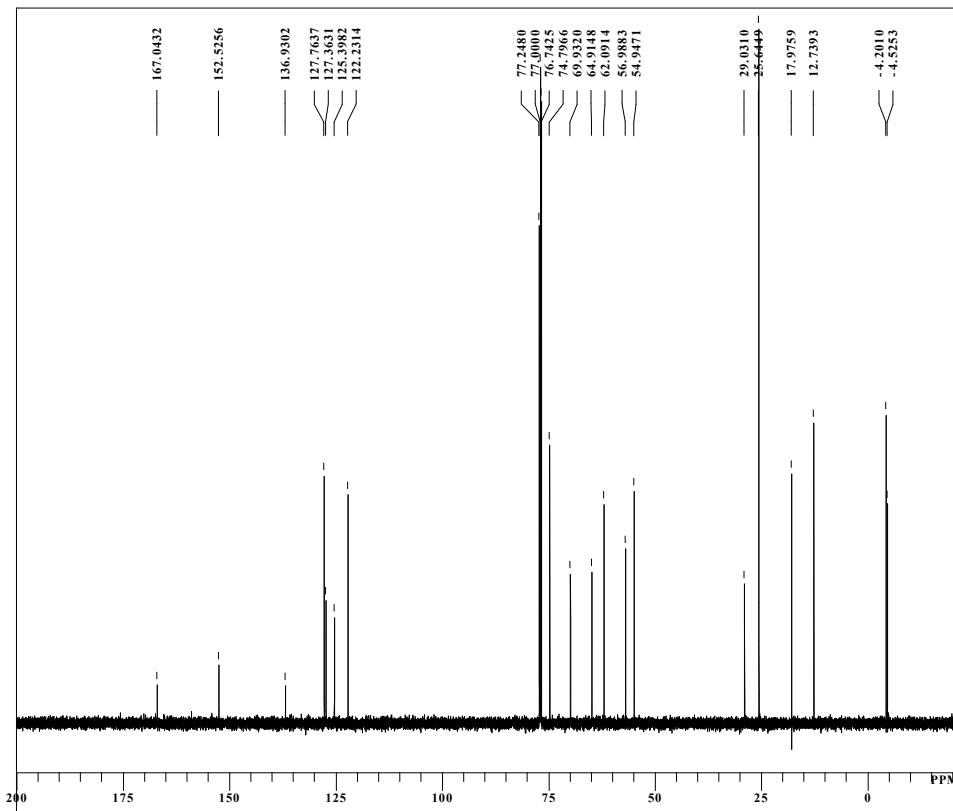

DFILE right\_muchikan\_ue\_So2Bt\_OTBS\_epox  
COMINT single\_pulse decoupled gated NOE  
DATIM 2019-12-05 22:52:51  
OBNUC 13C  
EXMOD carbon.jxp  
OBFREQ 125.77 MHz  
OBSSET 7.87 KHz  
OBFIN 4.21 Hz  
POINT 26214  
FREQU 31446.54 Hz  
SCANS 336  
ACQTM 0.8336 sec  
PD 1.0000 sec  
PWI 3.27 usec  
IRNUC 1H  
CTEMP 21.3 c  
SLVNT CDCL3  
EXREF 77.00 ppm  
BF 0.12 Hz  
RGAIN 60

single\_pulse

F:\SAA論文\NMR\muchikan HCImeOH ue proton-1-1.als

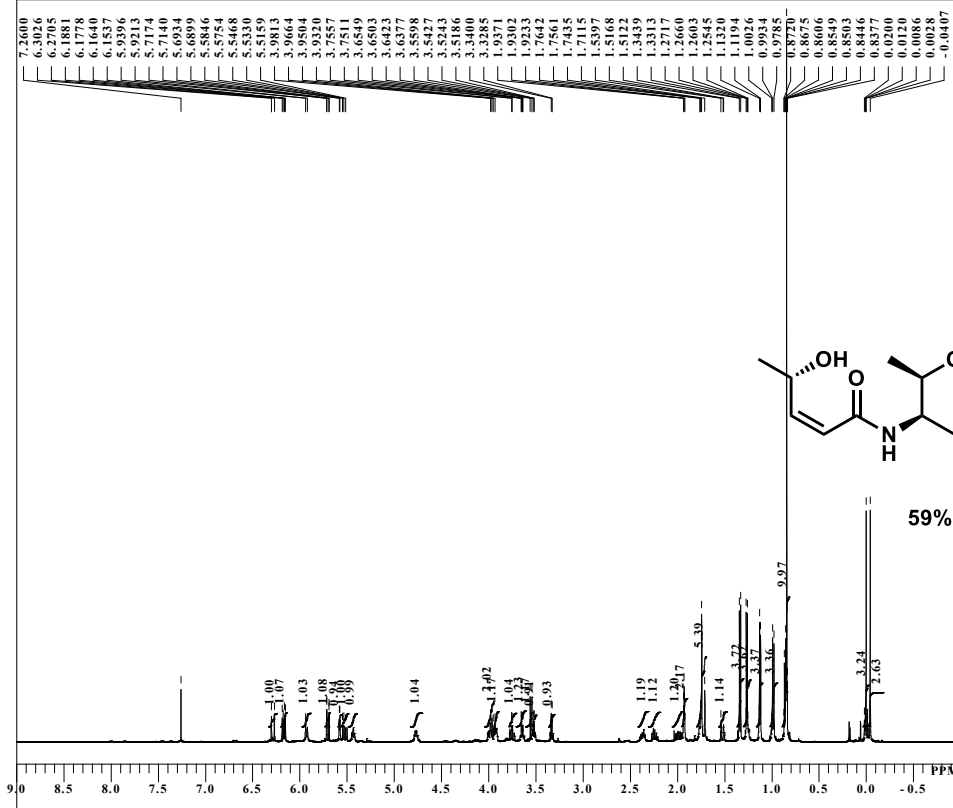

DFILE muchikan HCImeOH ue\_proton-1-1.a  
 COMINT single\_pulse  
 DATUM 2019-09-24 21:54:35  
 OBNUC 1H  
 EXMOD proton.jxp  
 OBFREQ 500.16 MHz  
 OBSSET 2.41 KHz  
 OBFIN 6.01 Hz  
 POINT 13107  
 FREQU 7507.51 Hz  
 SCANS 21  
 ACQTM 1.7459 sec  
 PD 2.0000 sec  
 PWI 6.50 usec  
 IRNUC 1H  
 CTEMP 21.6 c  
 SLVNT CDCL3  
 EXREF 7.26 ppm  
 BF 0.12 Hz  
 RGAIN 34

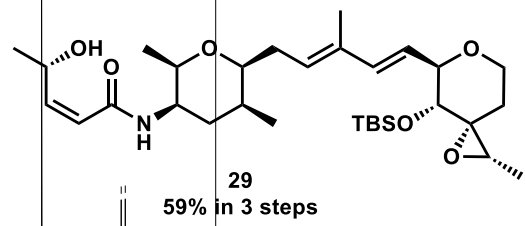

single\_pulse decoupled gated NOE

F:\SAA論文\NMR\muchikan hcImeoh ue Carbon-1-1.als

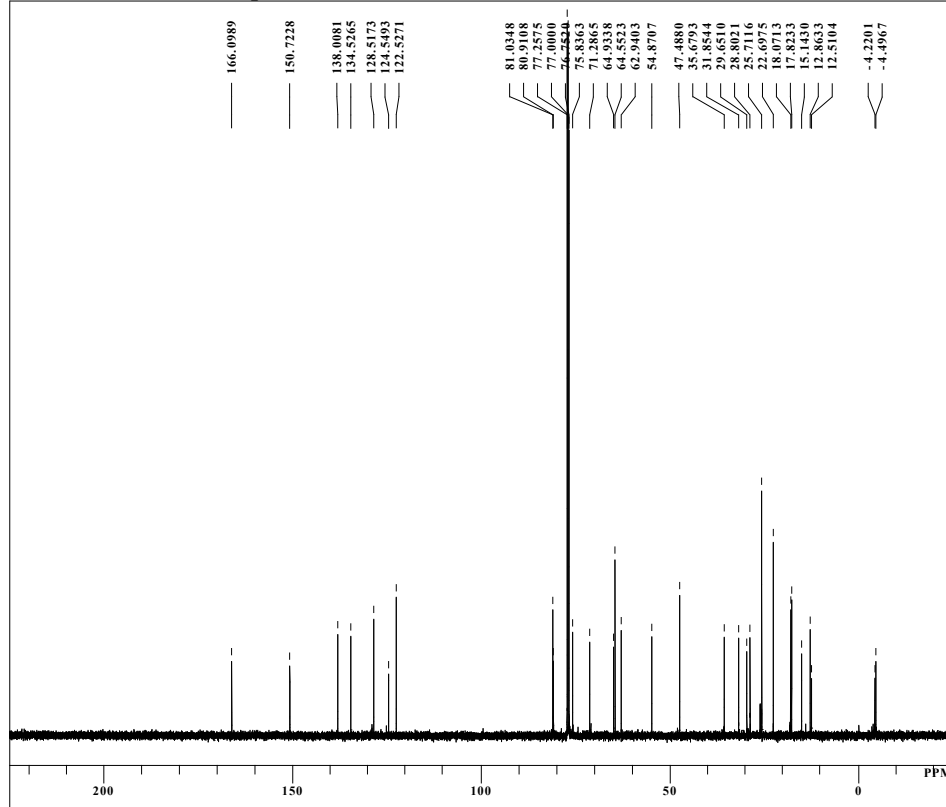

DFILE muchikan hcImeoh ue Carbon-1-1.als  
 COMINT single\_pulse decoupled gated NOE  
 DATUM 2019-09-24 22:09:40  
 OBNUC 13C  
 EXMOD carbon.jxp  
 OBFREQ 125.77 MHz  
 OBSSET 7.87 KHz  
 OBFIN 4.21 Hz  
 POINT 26214  
 FREQU 31446.54 Hz  
 SCANS 1348  
 ACQTM 0.8336 sec  
 PD 1.0000 sec  
 PWI 3.27 usec  
 IRNUC 13C  
 CTEMP 21.1 c  
 SLVNT CDCL3  
 EXREF 77.00 ppm  
 BF 0.12 Hz  
 RGAIN 60

single\_pulse

F:\SAA論文\NMR\muchikan ue yuudoutai proton-1-1.jdf

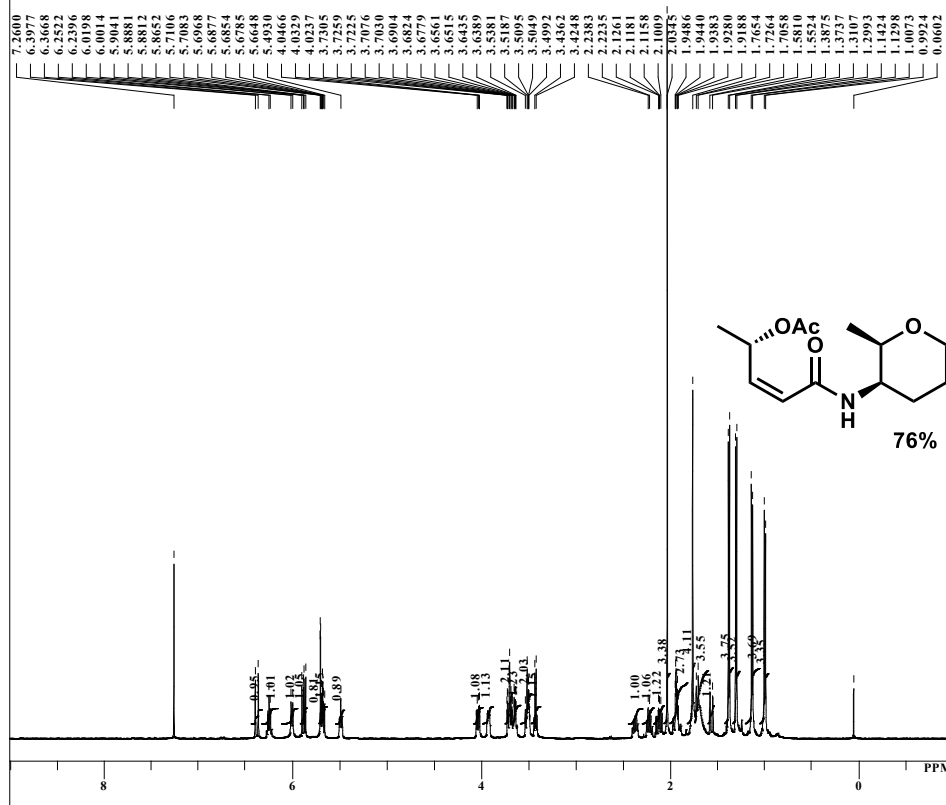

DFILE muchikan ue yuudoutai proton-1-1.jd  
COMINT single\_pulse  
DATUM 2019-09-25 19:03:18  
1H  
EXMOD proton.jxp  
OBFRQ 500.16 MHz  
OBSET 2.41 KHz  
OBFIN 6.01 Hz  
POINT 16384  
FREQU 9384.38 Hz  
SCANS 16  
ACQTM 1.7459 sec  
PD 2.0000 sec  
PWI 6.50 usec  
IRNUC 1H  
CTEMP 20.2 c  
SLVNT CDCL3  
EXREF 7.26 ppm  
BF 0.12 Hz  
RGAIN 40

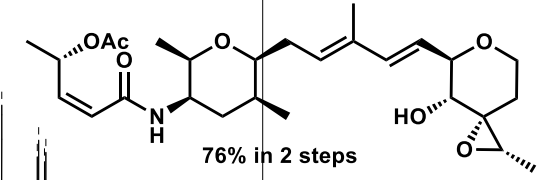

single\_pulse decoupled gated NOE

F:\SAA論文\NMR\muchikan ue yuudoutai Carbon-1-1.jdf

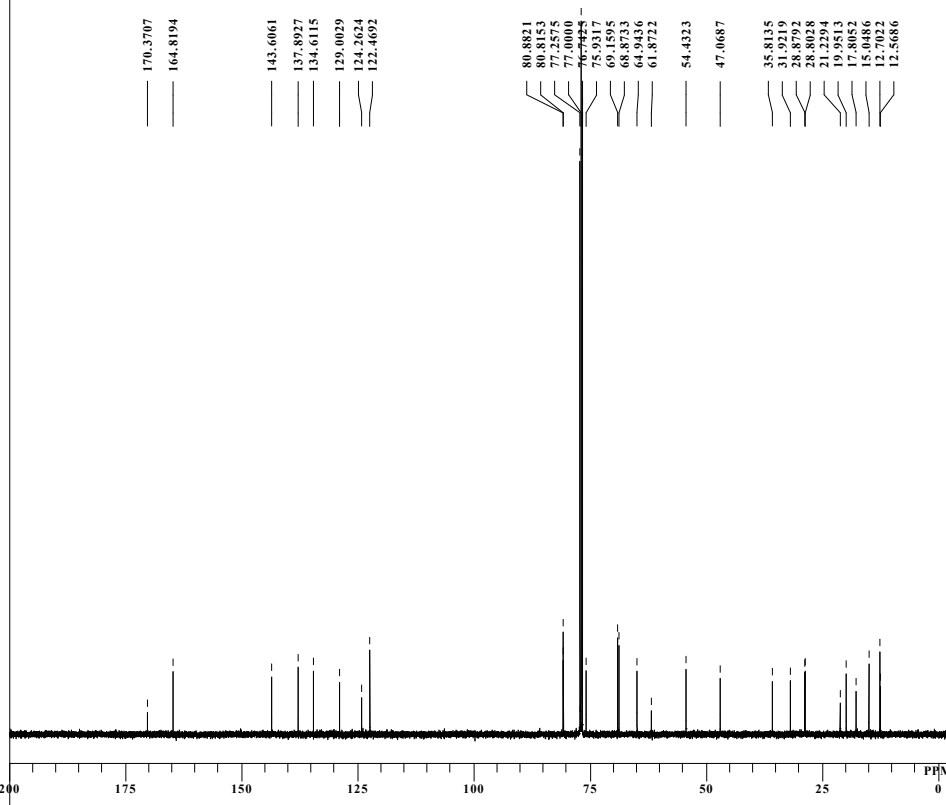

DFILE muchikan ue yuudoutai Carbon-1-1.j  
COMINT single\_pulse decoupled gated NOE  
DATUM 2019-09-25 19:10:04  
13C  
EXMOD carbon.jxp  
OBFRQ 125.77 MHz  
OBSET 7.87 KHz  
OBFIN 4.21 Hz  
POINT 32767  
FREQU 39308.18 Hz  
SCANS 1790  
ACQTM 0.8336 sec  
PD 1.0000 sec  
PWI 3.27 usec  
IRNUC 1H  
CTEMP 20.7 c  
SLVNT CDCL3  
EXREF 77.00 ppm  
BF 0.12 Hz  
RGAIN 60
